# Supplementary material
Source: publisher figshare collection journal article supplement (https://springernature.figshare.com/articles/dataset/_/21334422)

Figure 6C

1. Pro-IL-1 $\beta$

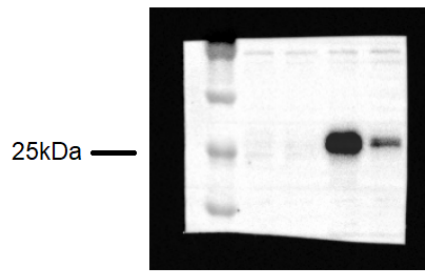

2. IL-6

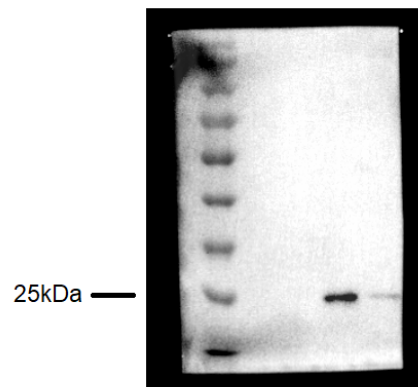

3. SFTSV

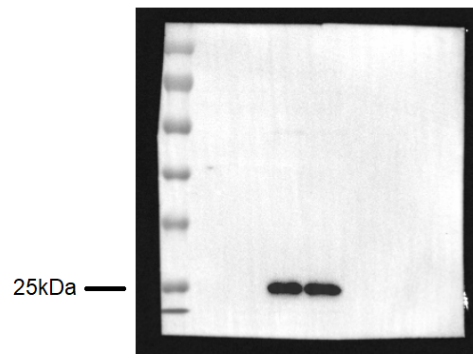

4. Tubulin

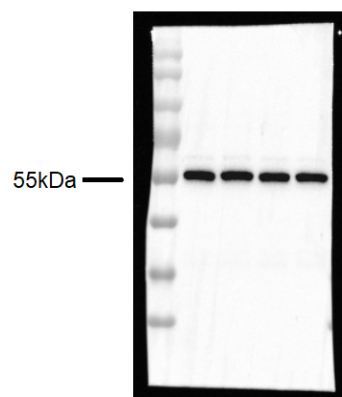

Figure 6F

1. P50 cellular protein

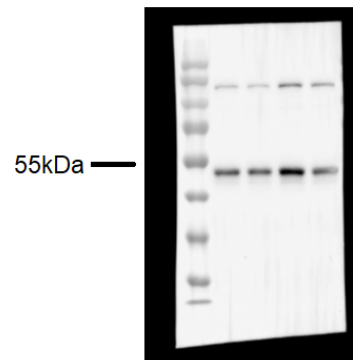

2. P65 cellular protein

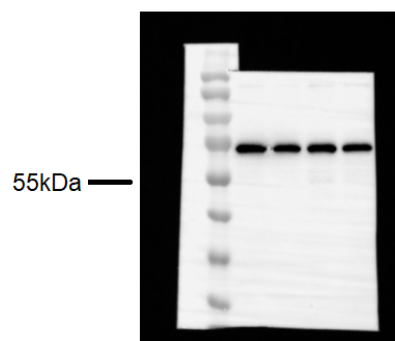

3. P-P65 cellular protein

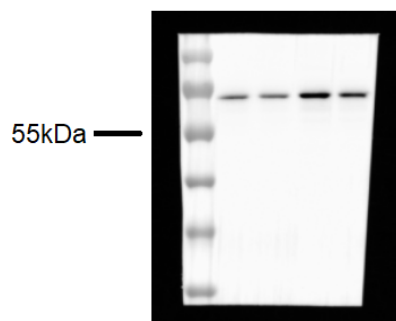

4. Tubulin

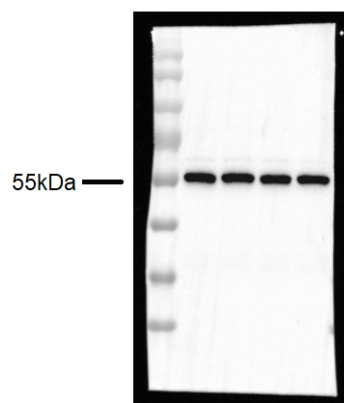

5. P50 cytosolic protein

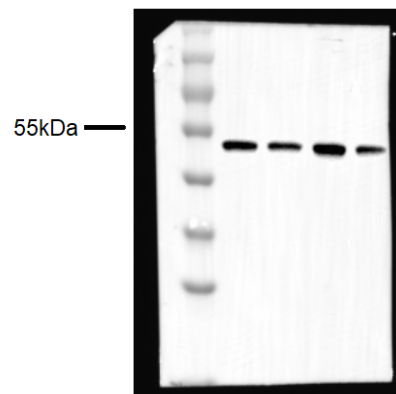

6. P65 cytosolic protein

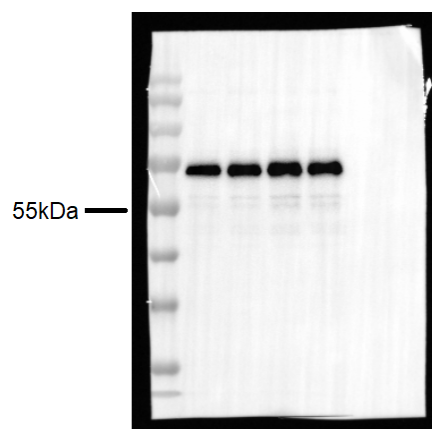

7. P-P65 cytosolic protein

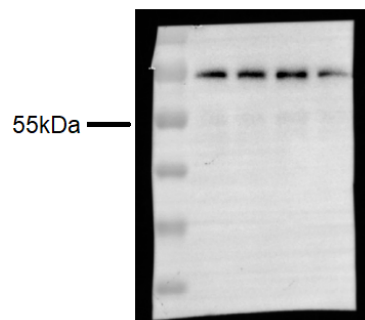

8. Tubulin

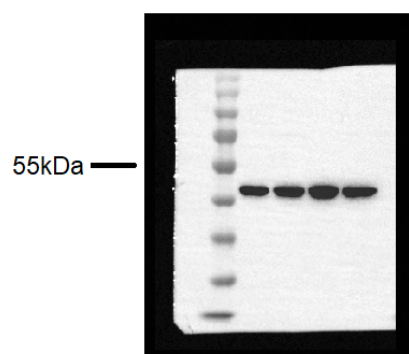

9. P50 nuclear protein

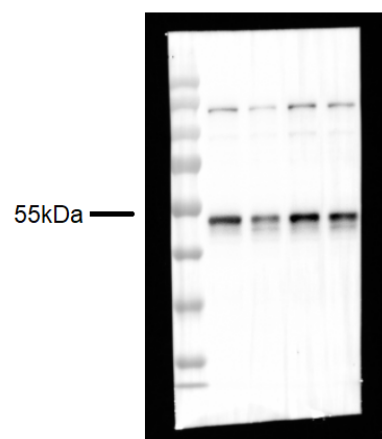

10. P65 nuclear protein

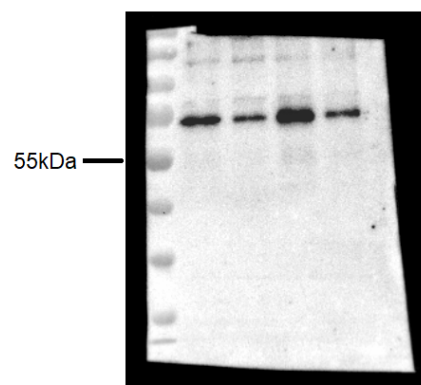

11. P-P65 nuclear protein

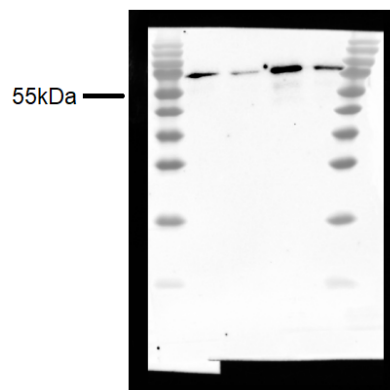

12. PCNA

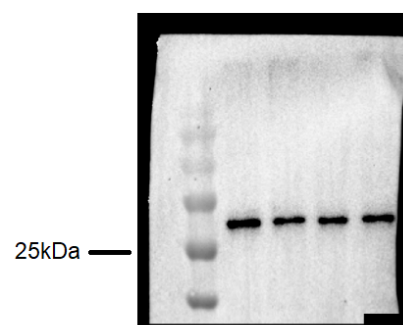

Figure 6H

1. Pro-IL-1 $\beta$

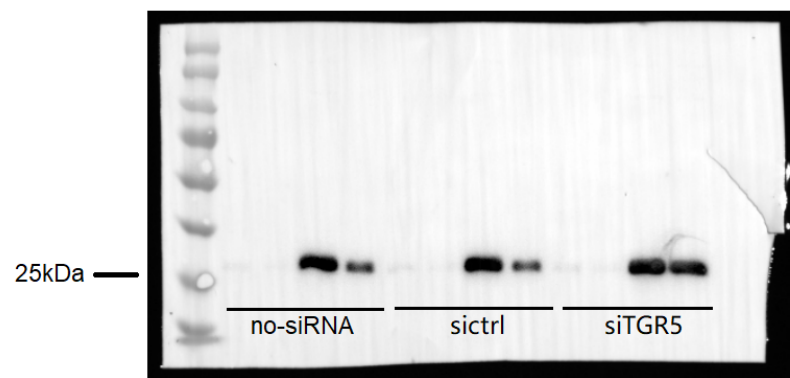

2. TGR5

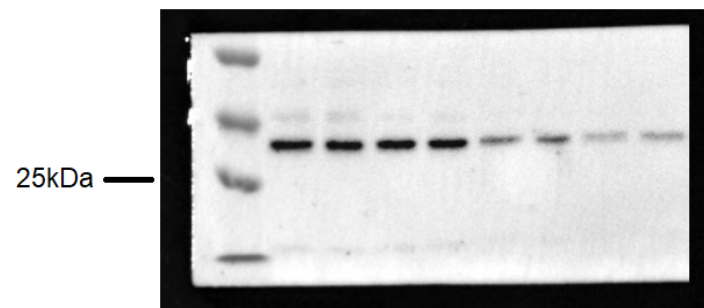

3. P50

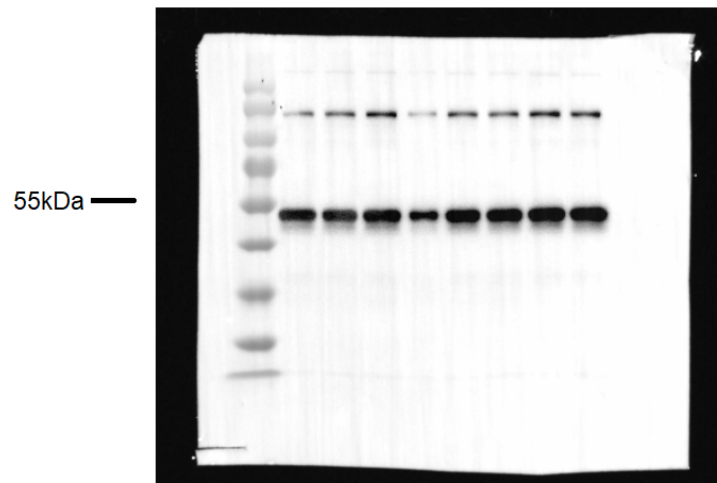

4. P65

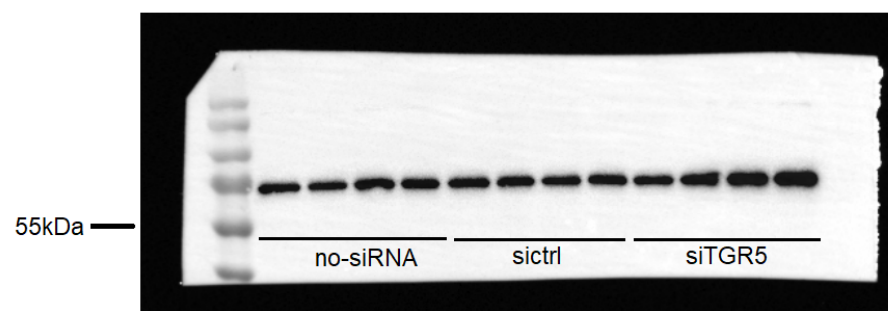

5. P-P65

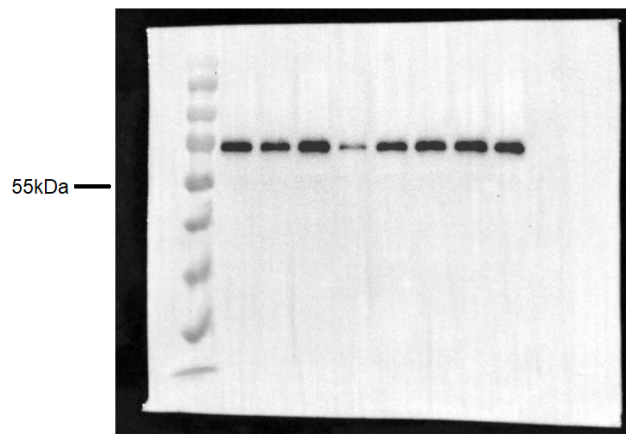

6. Tubulin

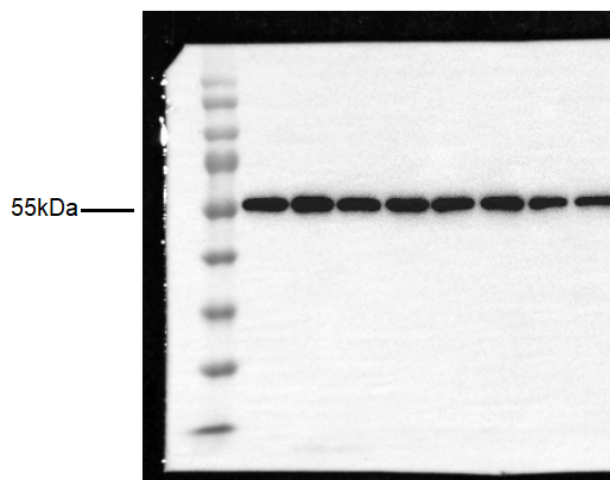

Supplement: Supplementary file 3 [file 1]
