# Supplementary material
Source: publisher figshare collection journal article supplement (https://springernature.figshare.com/articles/dataset/_/21334422)

**Figure 5A**

**1. CYP7A1**

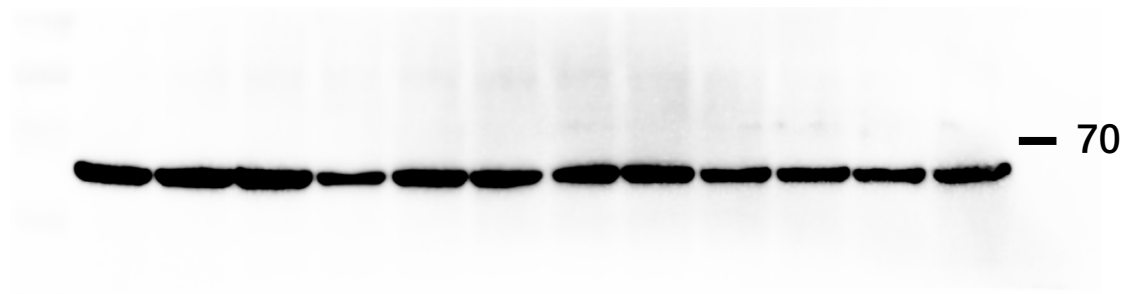

**2. CYP8B1**

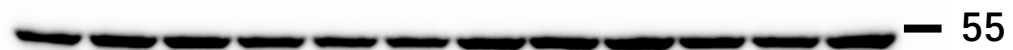

**3. CYP27A1**

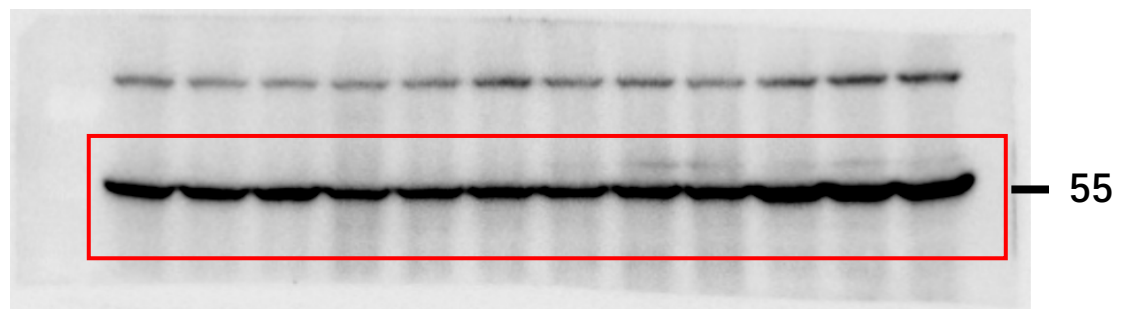

**4. CYP7B1**

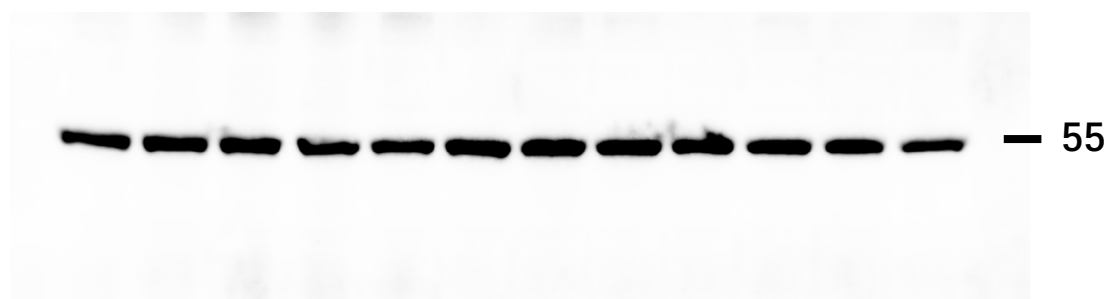

**5. BACS**

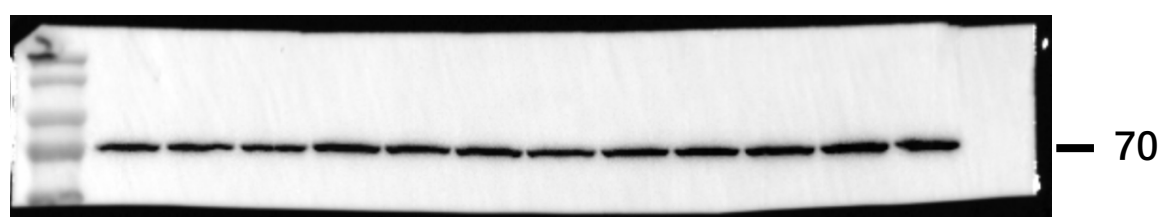

6. BAAT

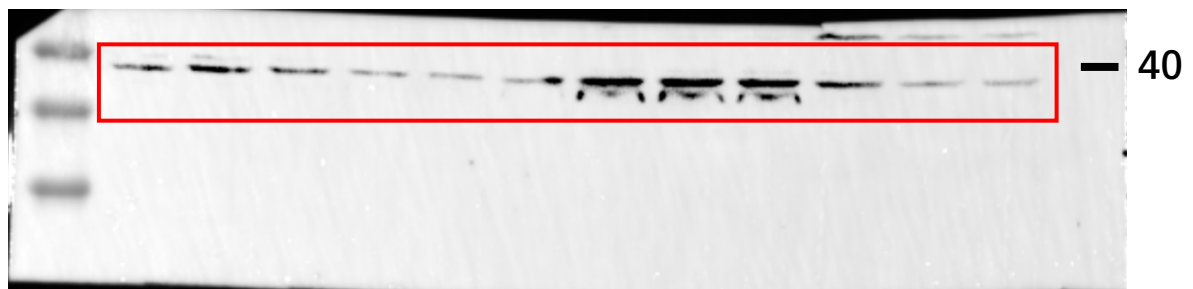

7. actin

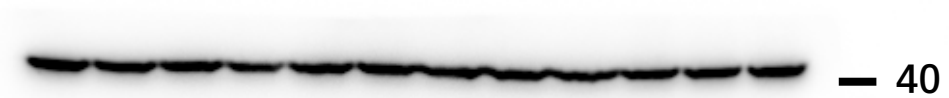

Figure 5B

1. CYP7A1

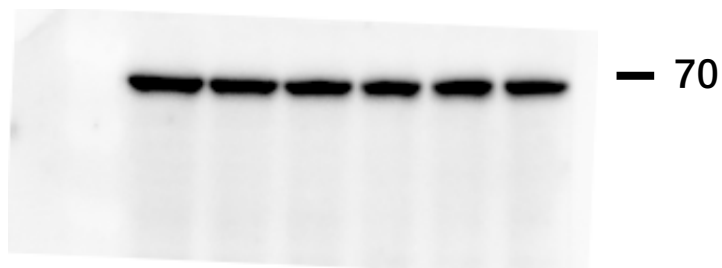

2. CYP8B1

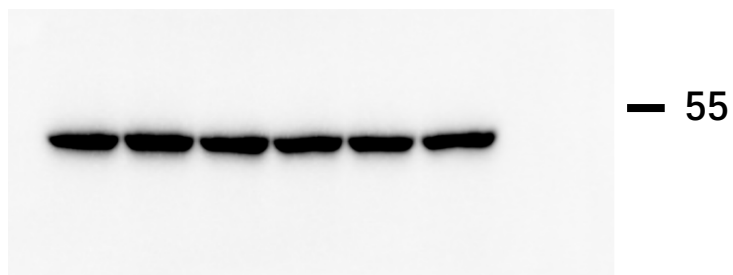

3. CYP27A1

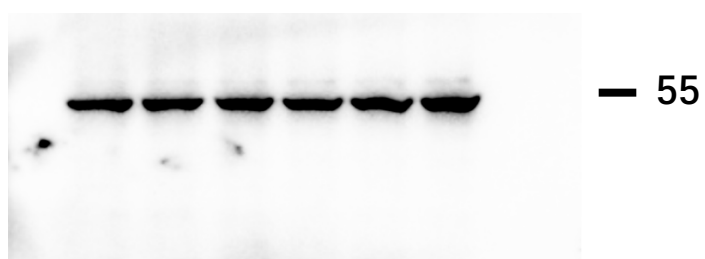

**4. CYP7B1**

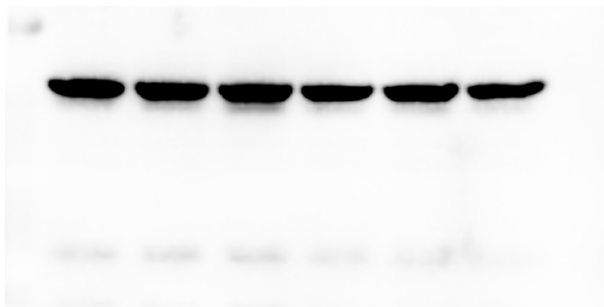

— 55

**5. BACS**

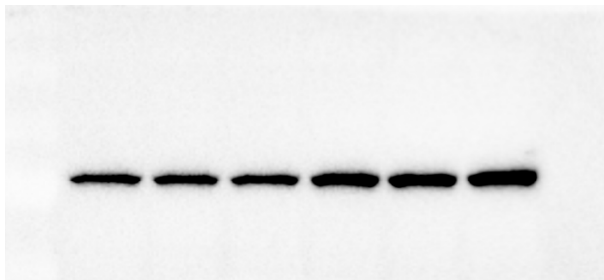

— 70

**6. BAAT**

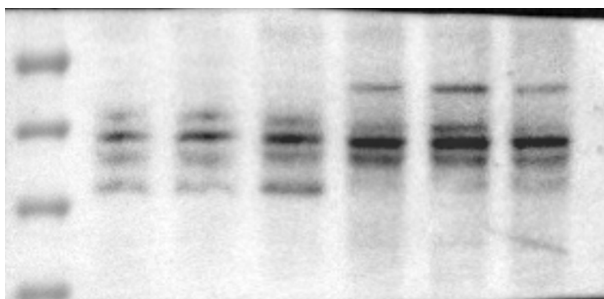

— 40

**7. Tubulin**

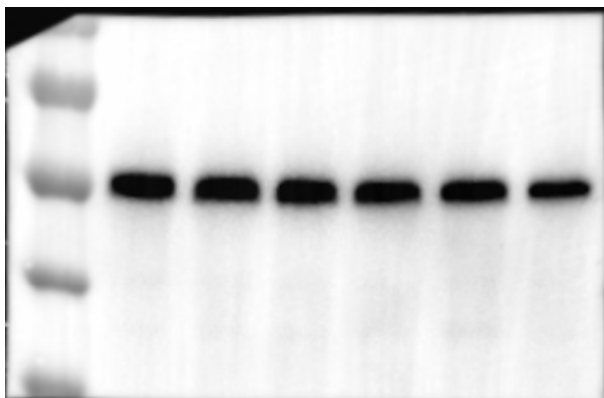

— 55

**Figure 5D**

**1. Baat**

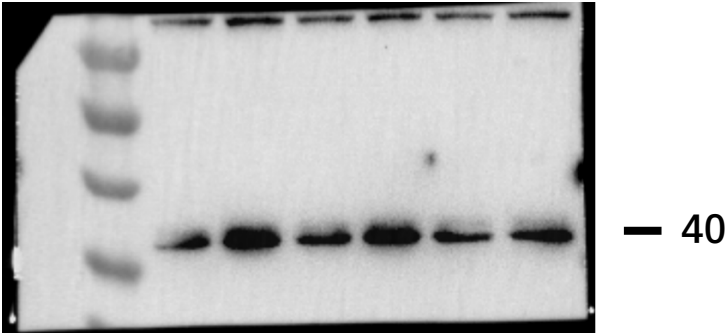

**2. Actin**

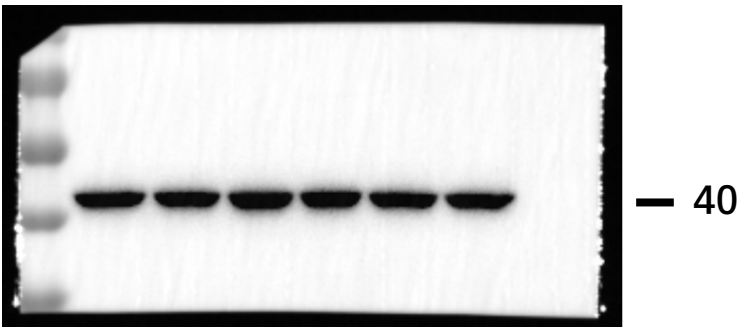



## Figure 5E

### 1. CYP7A1

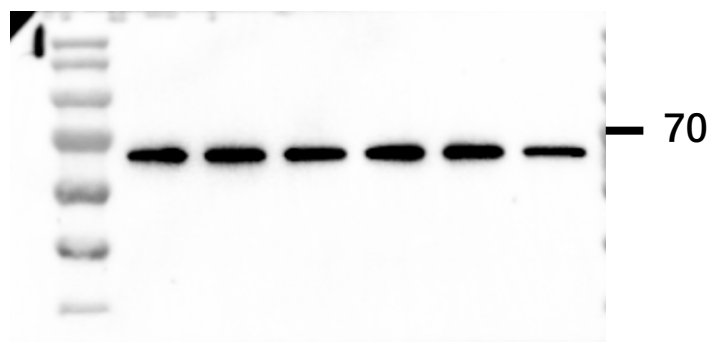

### 2. CYP8B1

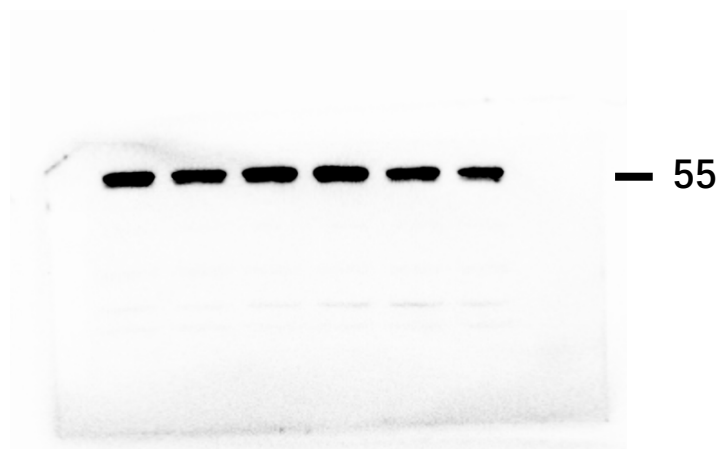

### 3. CYP27A1

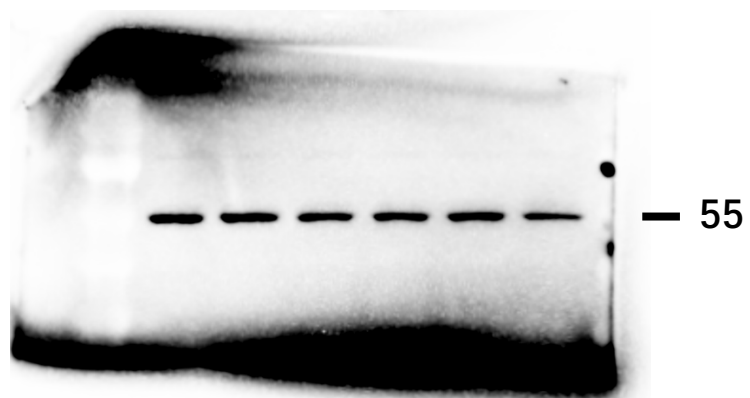

### 4. CYP7B1

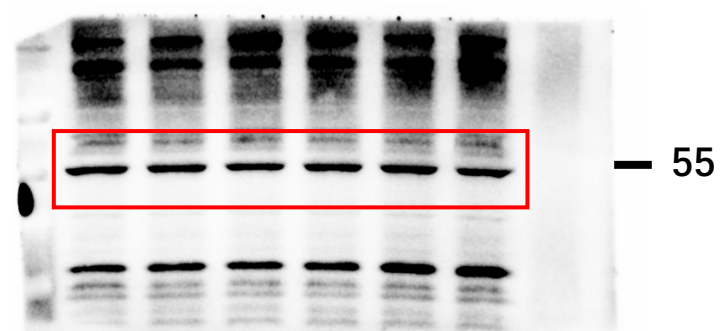

5. BACS

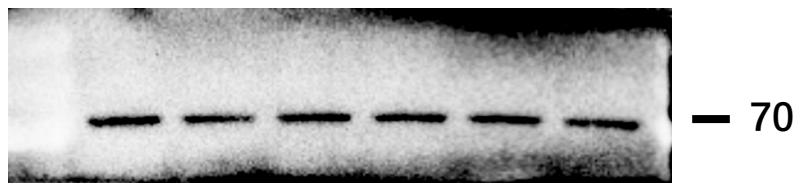

6. BAAT

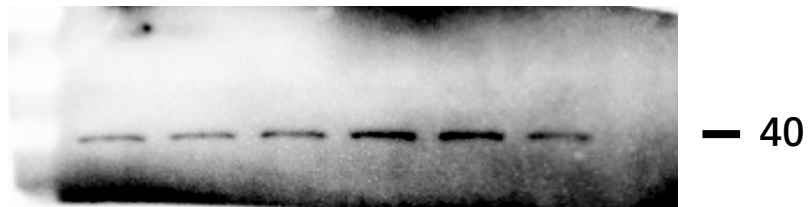

7. Actin

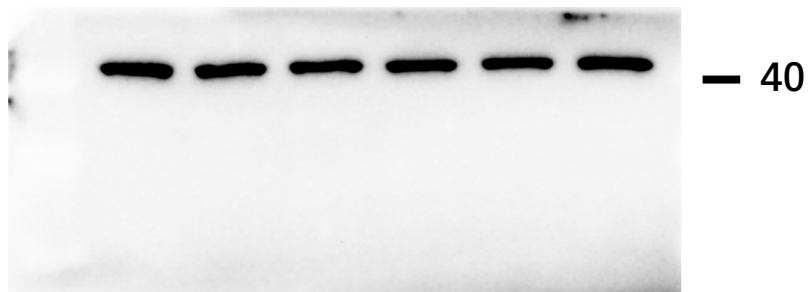

## Figure 5G

### 1. CYP7A1

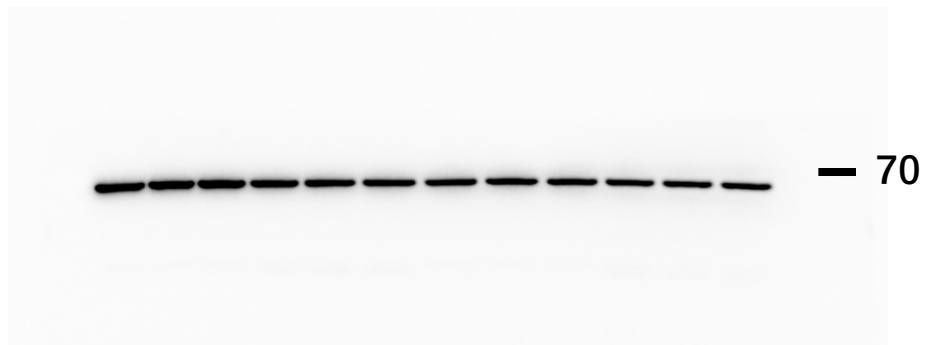

### 2. CYP8B1

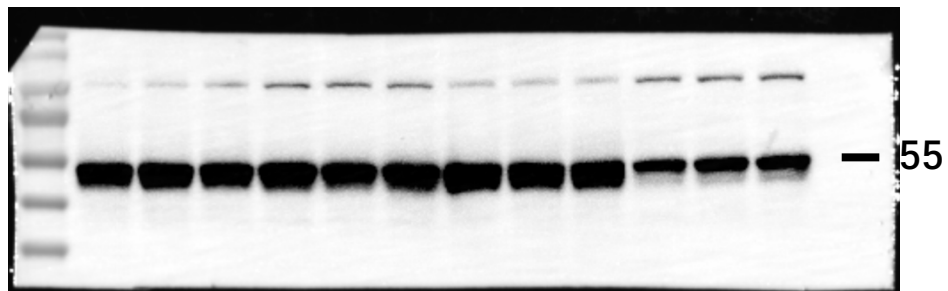

### 3. CYP27A1

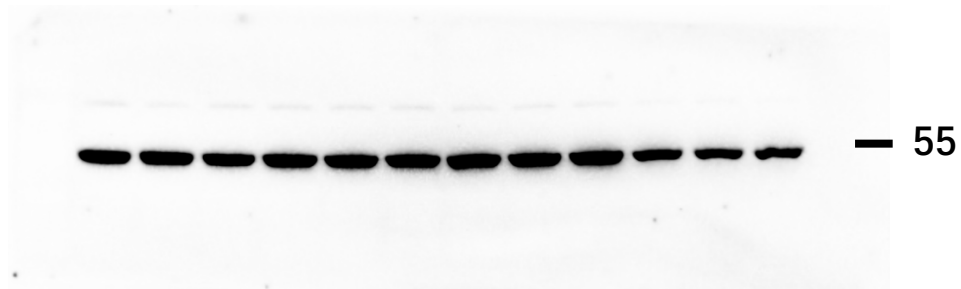

### 4. CYP7B1

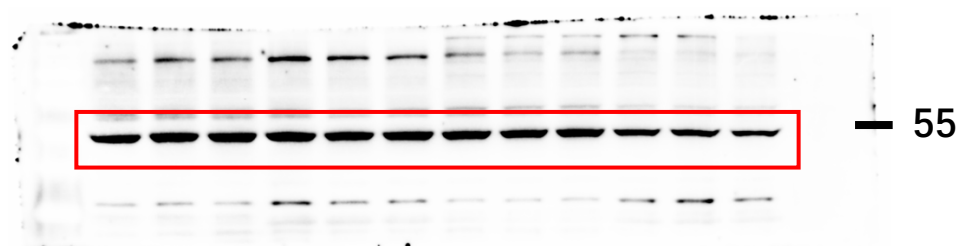

### 5. BACS

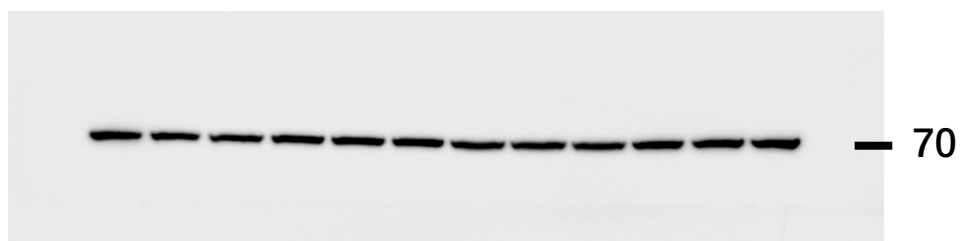

## 6. BAAT

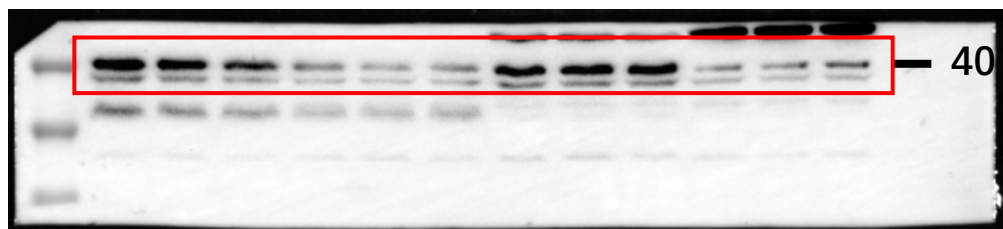

## 7. Actin

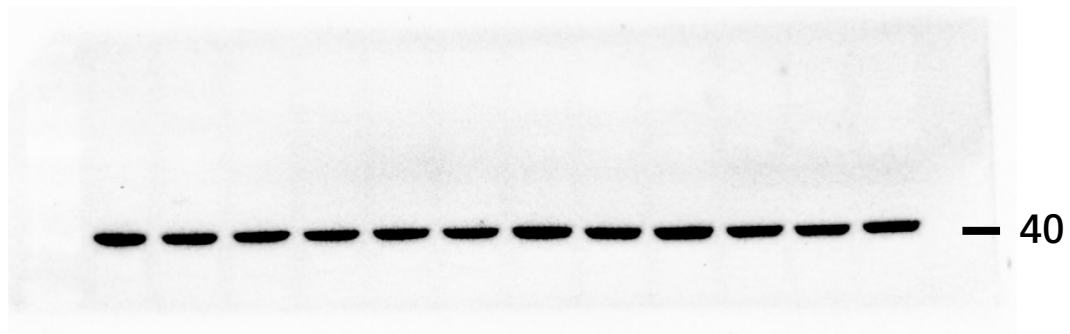

Supplement: Supplementary file 2 [file 1]
