# Supplementary material
Source: publisher figshare collection journal article supplement (https://springernature.figshare.com/articles/dataset/_/21334422)

Figure S10B

1. Pro-IL-1 $\beta$ (shTLR8)

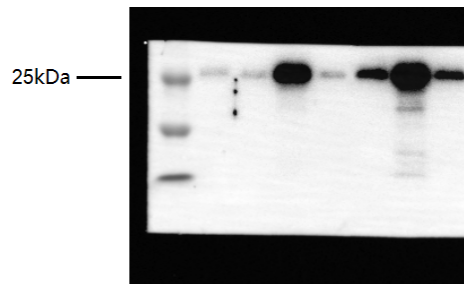

2. TLR8(shTLR8)

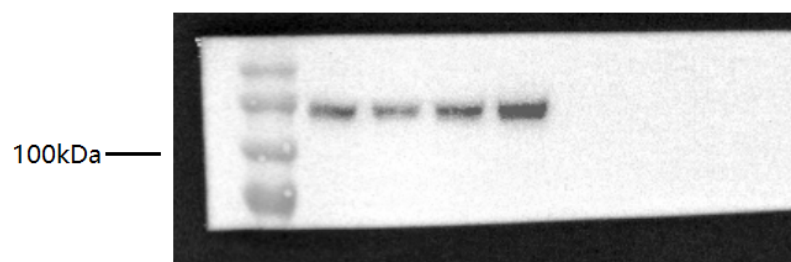

3. Tubulin(shTLR8)

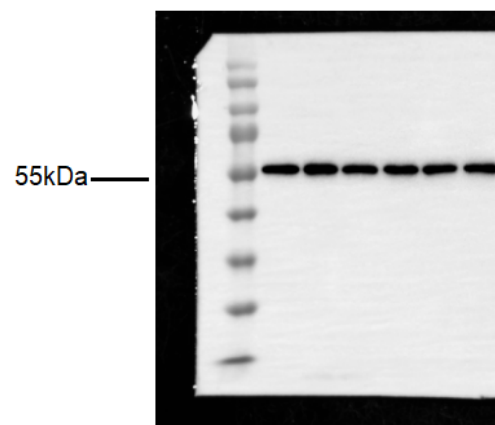

4. Pro-IL-1 $\beta$ (shMyD88)

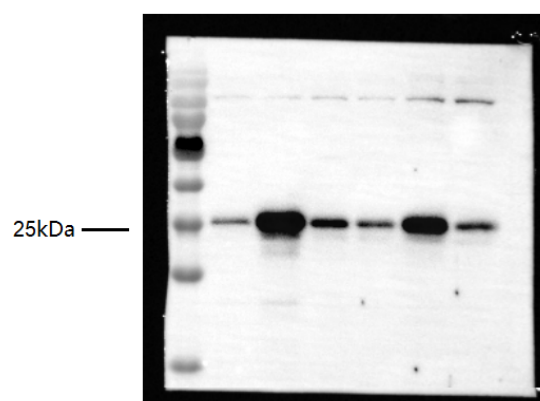

5. MyD88 (shMyD88)

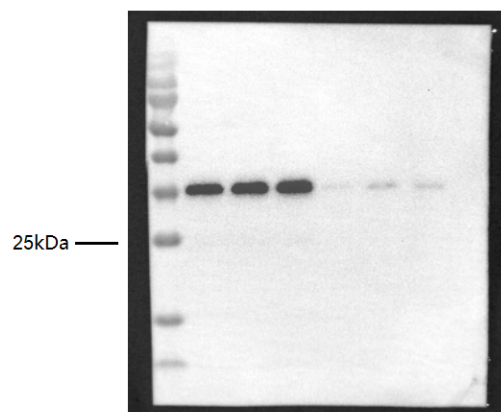

6. Tubulin(shMyD88)

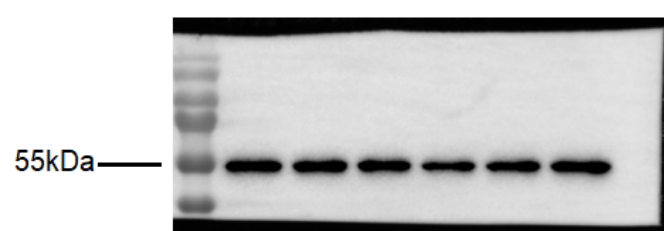

Figure S10D

1. MyD88

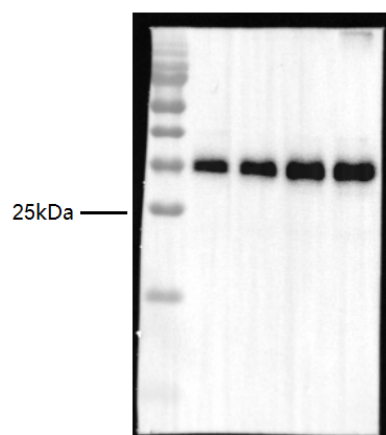

2. IKK $\beta$

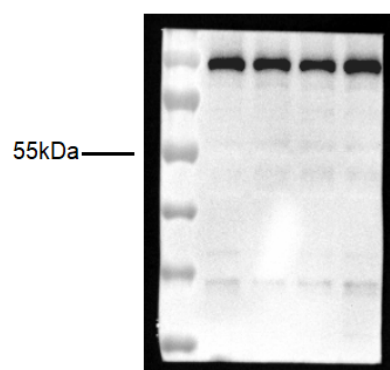

3. NLRP3

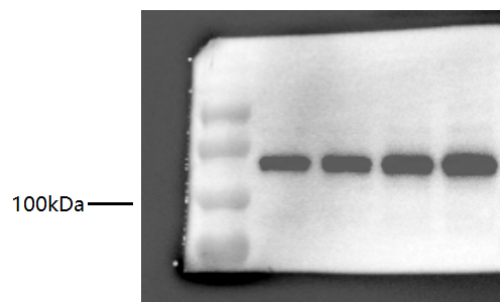

4. ASC

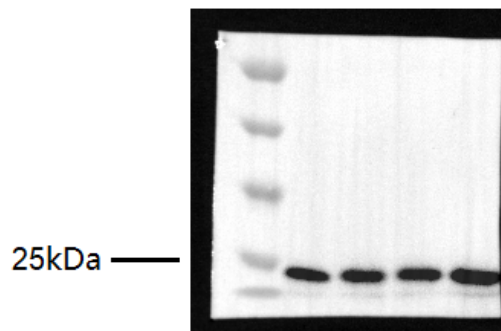

5. CASP1

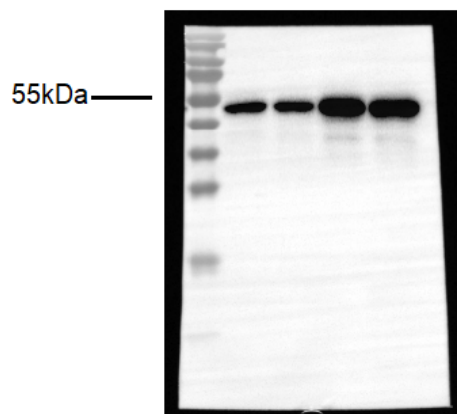

6. Tubulin

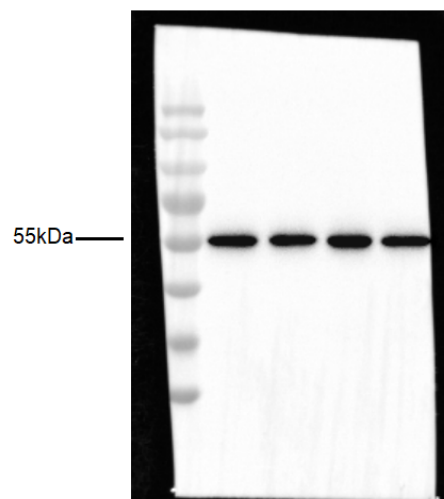

## Figure S10H

### 1. Pro-IL-1 $\beta$

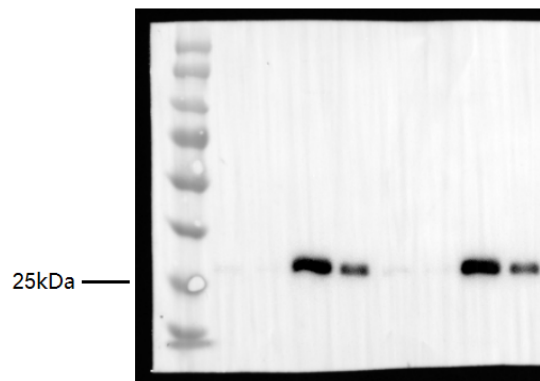

### 2. FXR

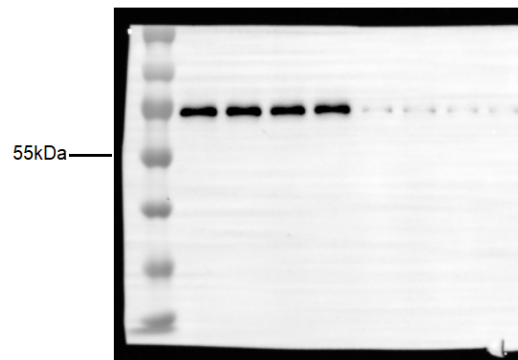

### 3. Tubulin

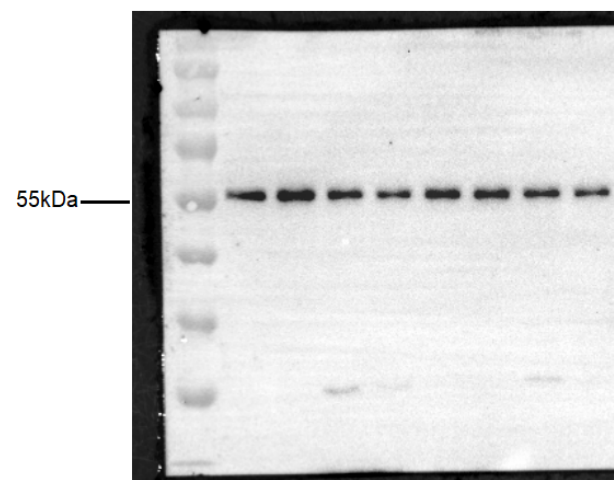

Supplement: Supplementary file 4 [file 1]
