# Supplementary material
Source: publisher figshare collection journal article supplement (https://springernature.figshare.com/articles/dataset/_/21334422)
Supplement: Supplementary file 5 [file 1]

Archive with 19 entries (19 files):
- Source_Data_Extended_Data_Fig3.xlsx
- Source_Data_Figure_1.xlsx
- Source_Data_Extended_Data_Fig5.xlsx
- Source_Data_Extended_Data_Fig6.xlsx
- Source_Data_Figure_4.xlsx
- Source_Data_Extended_Data_Fig1.xlsx
- Source_Data_Figure_6.xlsx
- Source_Data_Extended_Data_Fig8.xlsx
- Source_Data_Figure_2.xlsx
- Source_Data_Extended_Data_Fig2.xlsx
- Source_Data_Figure_3.xlsx
- Source_Data_Extended_Data_Fig7.xlsx
- Source_Data_Figure_5.xlsx
- Source_Data_Extended_Data_Fig8_Unprocessed_western_blots.pdf
- Source_Data_Figure_5_Unprocessed_western_blots.pdf
- Source_Data_Extended_Data_Fig10.xlsx
- Source_Data_Extended_Data_Fig9.xlsx
- Source_Data_Extended_Data_Fig10_Unprocessed_western_blots.pdf
- Source_Data_Figure_6_Unprocessed_western_blots.pdf
