# Supplementary material
Source: publisher figshare collection journal article supplement (https://springernature.figshare.com/articles/dataset/_/21334422)
Supplement: Supplementary file 5 [file 1 › Source_Data_Extended_Data_Fig1.xlsx]

## Sheet: Fig S1A
	HC	Non-SF	SF-S	SF-D
Firmicutes	0.591567	0.550367	0.520764	0.499901
Bacteroidetes	0.209	0.20654	0.225655	0.234954
Proteobacteria	0.150418	0.187784	0.183861	0.217595
Actinobacteria	0.0248287	0.0299602	0.0288276	0.0338338
Verrucomicrobia	0.00225256	0.00254093	0.0249958	0.00218602
Fusobacteria	0.00510284	0.00909275	0.00682941	0.00320159
Tenericutes	0.0136417	0.00437338	0.00286041	0.00337847
Euryarchaeota	0.00039928	0.00112642	0.0027952	0.00101303
Acidobacteria	0.00106314	0.00119822	0.00112457	0.000460392
Thaumarchaeota	1.20265e-05	2.98613e-05	0.000167014	1.43873e-05
Gemmatimonadetes	0.000150331	0.000244603	0.000133572	0.000164184
Chloroflexi	0.000184005	0.000488426	0.000132395	0.0001261
Cyanobacteria	0.000151534	0.000597355	0.000131316	7.87068e-05

## Sheet: Fig S1B
HC	Non-SF	SF-S	SF-D		HC	Non-SF	SF-S	SF-D		HC	Non-SF	SF-S	SF-D
0.00351895	0.00683226	0.0317848	0.0104426		0.0203368	0.0143729	0.0180518	0.0117908		0.00063981	0.00242214	0.00153097	0.0165894
0.000274204	0.00269634	0.0105569	0.18879		2.28504e-05	0.00470717	0.0129104	0.0117908		0	0.00267349	0.00139387	0.0170692
0.0145328	0.00137102	0.00383886	0.00751777		0.027489	0.00402166	0.025501	0.0259809		2.28504e-05	0.00203368	0.00123392	0.00333615
0.00198798	0.000822613	0.00523273	0.102141		0.00438727	0.00470717	0.0393255	0.0381601		0.000274204	0.00141672	0.000914014	0.00708361
0.0219363	0.0111053	0.0502936	0.00191943		0.0126362	0.0467975	0.015264	0.00166808		9.14014e-05	0.00724356	0.176976	0.00187373
0.0030391	0.0152869	0.00383886	0.0477115		0.0130019	0.010237	0.00198798	0.027032		0.000205653	0.0034961	0.00100542	0.0124763
0.00370176	0.0033133	0.00856888	0.00507278		0.00646665	0.022142	0.00379316	0.0107397		0.000205653	0.000251354	0.00287914	0.00427302
0.00338185	0.0097114	0.0193999	0.0256838		0.0204739	0.00605534	0.00520988	0.0143729		0.000205653	0.020611	0.00185088	0.0274661
0.0570345	0.00196513	0.023513	0.161552		0.01924	0.015424	0.00868313	0.0155611		0.00333615	0.00244499	0.00438727	0.0224847
0.0029934	0.00534698	0.00527843	0.00827183		0.0351895	0.022599	0.0607591	0.0159724		0.000685511	0.0621301	0.0234902	0.00301625
0.00210223	0.00655805	0.0583598	0.0367662		0.0367434	0.0328817	0.0247698	0.0126591		0.00683226	0.011151	0.00815758	0.000936864
0.00409021	0.00422732	0.00402166	0.0649864		0.0108768	0.00950575	0.0110367	0.00518703		0.000114252	0.00415876	0.000548408	0.55668
0.00171378	0.0714988	0.00610104	0.0735553		0.00539268	0.0210223	0.00776912	0.0268035		0.000936864	0.00329045	0.074675	0.0120193
0.00351895	0.0111281	0.0034504	0.00324475		0.0117679	0.0132761	0.0432557	0.071613		0.000319905	0.0493796	0.00930009	0.00461577
0.00194228	0.00221648	0.00459292	0.00153097		0.00996275	0.0234445	0.0180518	0.0229418		0.000274204	0.00237644	0.00452437	0.00802047
0.0168407	0.00514133	0.00333615	0.00562119		0.0155382	0.0119507	0.00786052	0.00114252		0.000182803	0.0031305	0.672577	0.000959715
0.00196513	0.010694	0.0103055	0.00891164		0.00605534	0.00233074	0.0171606	0.0238786		0.000114252	0.0320362	0.00383886	0.00203368
0.0178461	0.0029477	0.0118136	0.00854603		0.0179375	0.00683226	0.0168636	0.00457007		0.00477572	0.00109682	0.0168864	0.00779197
0.00914014	0.0103055	0.00495853	0.00175948		0.033293	0.0175948	0.00196513	0.0220506		0.00820328	0.00212508	0.0659004	0.000365606
	0.00262779	0.00680941	0.00555264			0.00996275	0.00694651	0.0248383			0.0228275	0.00719786	0.000799762
	0.00390741	0.00726641	0.0307566			0.0029477	0.0121792	0.164523			0.217764	0.0238558	0.0486027
	0.0033133	0.00386171	0.346251			0.129859	0.126705	0.00724356			0.00116537	0.0187601	0.0210452
	0.00244499	0.0294541	0.00578114			0.011608	0.0727555	0.33213			0.00358751	0.0260037	0.220689
	0.00840893	0.00507278	0.0635925			0.103375	0.0288828	0.0316934			0.0213651	0.00568974	0.000914014
	0.00783767	0.0238101	0.0176405			0.0146014	0.00374746	0.027946			0.0668373	0.556497	0.00399881
	0.000959715	0.00811188	0.00838608			0.0062153	0.0098942	0.319745			0.0309394	0.000776912	0.0295455
	0.000594109	0.00310765	0.0101456			0.0162695	0.244407	0.0218906			0.000914014	0.000685511	0.0119507
	0.000479857	0.00498138				0.0156753	0.00244499				0.0183488	0.00109682
	0.000479857	0.00788337				0.00534698	0.00242214				0.0391198	0.00255924
	0.00338185	0.00267349				0.00502708	0.00415876				0.0153783	0.00534698
	0.00877454	0.0098942				0.00548408	0.0179147				0.00201083	0.00342755
	0.00285629	0.00539268				0.018326	0.0107854				0.0314649	0.0100999
	0.00381601	0.00573544				0.0509106	0.00934579				0.00258209	0.0130019
	0.00351895	0.00491283				0.022439	0.0109682				0.00850033	0.0234673
	0.00063981	0.0325161				0.0127505	0.0271691				0.0031762	0.0034504
	0.000457007	0.0252039				0.00111967	0.0150127				0.00116537	0.0171606
	0.00061696	0.0334529				0.000319905	0.0392112				0.713274	0.00365606
	0.0766858	0.0185316				0.00397596	0.00813473				0.00123392	0.00758632
	0.000845463	0.0138473				0.00628385	0.010237				0.0109682	0.0097114
	0.00207938	0.00262779				0.0119964	0.0198798				0.00409021	0.00370176
	0.00383886	0.0383657				0.0102141	0.0231931				0.0229418	0.0209081
	0.00338185	0.00760917				0.034207	0.0139159				0.00646665	0.0066266
	0.00201083	0.00884309				0.018326	0.0403309				0.000822613	0.00132532
	0.00409021	0.0164294				0.000548408	0.133103				0.0185316	0.0185316
	0.00205653	0.0555949				0.0502479	0.0162695				0.00125677	0.00552979
	0.0180518	0.00217078				0.0112881	0.167219				0.0157439	0.11953
	0.00164523	0.0310079				0.0133446	0.0336814				0.00127962	0.0204968
	0.00150812	0.00527843				0.00580399	0.063981				0.0029934	0.0111738
	0.150173	0.0113795				0.00171378	0.00132532				0.00148527	0.040468
	0.000411306	0.00452437				0.0324704	0.0909901				0.00130247	0.00690081
	0.0142586	0.00834038				0.00141672	0.0124991				0.00226218	0.00536983
	0.0226676	0.208921				0.0450837	0.0115851				0.00402166	0.0219592
	0.0207938	0.0146242				0.0316249	0.010534				0.00418161	0.0176862
	0.258118	0.0199941				0.00733496	0.0174805				0.00358751	0.0234673
	0.0109453	0.0164066				0.00706076	0.0254781				0.000525558	0.373283
	0.0146928	0.00516418				0.0239243	0.00271919				0.00157667	0.000251354
	0.0130247	0.0838836				0.00749492	0.01435				0.00358751	0.00162238
	0.0238101	0.00319905				0.00415876	0.0233074				0.01908	0.000799762
	0.00159952	0.0548637				0.0160638	0.00365606				0.000868313	0.0032676
	0.00251354	0.00904874				0.00285629	0.0209309				0.00185088	0.596806
	0.00287914	0.0179375				0.0165437	0.00904874				0.000822613	0.0121335
	0.00527843	0.045655				0.0107854	0.00815758				0.00171378	0.00285629
	0.000982565	0.0033133				0.0168864	0.0368576				0.000228504	0.0112652
	0.0099856	0.112104				0.0884766	0.0758632				0.0102827	0.00255924
	0.156296	0.436807				0.0132304	0.0296369				0.0423189	0.00102827
	0.0031762	0.00130247				0.00776912	0.0166579				0.0148756	4.57007e-05
	0.00258209	0.00822613				0.0426388	0.000479857				0.00859173	0.766606
	0.0126134	0.0327217				0.0198341	0.025341				0.0235359	0.1528
	0.00191943	0.0273976				0.0340699	0.0126591				0.00692366	0.339213
	0.0119507	0.0111967				0.00678655	0.0110139				0.00244499	0.0114937
	0.0203597	0.0222105				0.00399881	0.000571259				0.00265064	0.00201083
	0.0179147	0.439869				0.00770057	0.00338185				0.00207938	0.0122706
	0.0171149	0.0135731				0.0173663	0.0442383				0.00550694	0.00379316
	0.0573315	0.0386856				0.0189429	0.0155839				0.00619245	0.030391
	0.00733496	0.0160866				0.0101913	0.013139				0.000754062	0.0130247
	0.00850033	0.144323				0.00166808	0.0596166				0.0124991	0.00863743
	0.0121335	0.0124077				0.0218906	0.023056				0.00491283	0.000159952
	0.027946	0.00178233				0.104632	0.00797477				0.000982565	2.28504e-05
	0.00555264	0.00664945				0.0377945	0.0164523				0.000868313	0.00466147
	0.0159952	0.000137102				0.06734	0.0155382				0.00139387	4.57007e-05
	0.549917	0.0100313				0.0117222	0.0243128				0.00203368	0.00589539
	0.0065352	0.0113566				0.00459292	0.120124				0.00365606	0.00406736
	0.00511848	0.0268949				0.00473002	0.017252				0.0205425	0.0849576
	0.012819	0.0236044				0.03359	0.0178461				0.0099856	0.00664945
	0.00982565	0.0215707				0.0305052	0.0284944				0.00066266	0.0062153
	0.00226218	0.00900304				0.00600964	0.00573544				0.000548408	0.00242214
	0.0064438	0.00427302				0.00527843	0.00210223				0.0098485	0.000182803
	0.00950575	0.0773027				0.0538811	0.0155839				0.00799762	0.00274204
	0.00790622	0.0709046				0.0958115	0.00393026				0.00175948	0.00445582
	0.00516418	0.00776912				0.0256381	0.0315106				0.00109682	0.034047
	0.0233759	0.000319905				0.0184631	0.0527158				0.000754062	0.000434157
	0.148824	0.00221648				0.00495853	0.00977995				0.0318077	0.00226218
	0.0190343	0.014967				0.00690081	0.00719786				0.0093915	0.00111967
	0.0236501	0.0129104				0.00251354	0.00936864				0.00306195	0.0135046
	0.233462	0.0447181				0.00066266	0.00802047				0.0404223	0.00564404
	0.00315335	0.0033133				0.0204511	0.042753				0.00744922	0.000457007
	0.00271919	0.148984				0.021525	0.0225761				0.000594109	0.0106254
	0.00242214	0.00470717				0.0201997	0.0034047				0.000228504	0.045358
	0.00434157	0.0301625				0.0145785	0.00678655				0.00694651	0.0383886
	0.0122935	0.00534698				0.00683226	0.025341				0.158056	0.00431872
	0.00278774	0.00310765				0.0100542	0.0266664				0.00201083	0.00214793
	0.0111281	0.0435985				0.0162466	0.00358751				0.00363321	0.0098028
	0.00536983	0.193771				0.0270777	0.00514133				0.00356466	0.0414048
	0.027032	0.0659918				0.0107854	0.00443297				0.00150812	0.0119279
	0.00580399	0.0273976				0.00386171	0.0115623				0.0034047	0.00962
	0.00141672	0.0098942				0.0150584	0.0480086				0.00111967	0.00287914
	0.00834038	0.0697621				0.00297055	0.00927724				0.00118822	0.32203
	0.00217078	0.0219135				0.00127962	0.00895734				0.000525558	0.0117451
	0.00377031	0.0171149				0.00916299	0.0031305				0.0121335	0.000228504
	0.000137102	0.00153097				0.0295684	0.00333615				0.00233074	0.000274204
	0.0172977	0.0138473				0.00251354	0.0878596				0.00102827	0.0108996
	0.00221648	0.0100313				0.0139159	0.0115623				0.00539268	0.00219363
	0.00201083	0.00589539				0.00493568	0.0797477				4.57007e-05	0.00214793
	0.00584969	0.0117451				0.0423417	0.0111053				0.00500423	0.0324932
	0.0263236	0.0168179				0.0156982	0.0520988				0.0173891	0.00532413
	0.0672257	0.0702648				0.00900304	0.0116994				0.000525558	0.0035418
	0.286612	0.0123849				0.0032676	0.0155611				0.00063981	0.0318762
	0.000548408	0.137582				0.0129333	0.00518703				0.00473002	0.00164523
	0.00258209	0.118113				0.0153554	0.0605534				0.000571259	0.0100085
	0.00226218	0.0110367				0.00591824	0.00559834				0.00123392	0.120261
	0.0254781	0.0200169				0.0715673	0.00397596				0.0156296	0.031305
	0.00845463	0.0935722				0.00116537	0.0105797				0.0301853	0.0101913
	0.00114252	0.00536983				0.0144414	0.0032676				0.00164523	0.00415876
	0.000479857	0.0099399				0.00543838	0.00578114				0.00235359	0.0185773
	0.000914014	0.00434157				0.00109682	0.0324018				0.81786	0.0119736
	0.00249069	0.00783767				0.00792907	0.0661746				0.575737	0.0134817
	0.00719786	0.000685511				0.00431872	0.0137559				0.00882024	0.00212508
	0.000525558	0.010534				0.039097	0.0556635				0.00701506	0.00781482
	0.0093915	0.0151269				0.0443525	0.119644				0.0032676	0.376003
	0.000891164	0.00146242				0.0356694	0.0339099				0.00450152	0.00196513
	0.0138473	0.00223933				0.0857802	0.00902589				0.103306	0.00207938
	0.00105112	0.0308708				0.00781482	0.0174805				0.0147842	0.010694
	0.00418161	0.0102141				0.0160181	0.0159495				0.020154	0.0154925
	0.00134817	0.0155611				0.0095286	0.252382				0.00278774	0.00726641
	0.016795	0.0142586				0.0233302	0.00637525				0.00253639	0.00740351
	0.00920869	0.000548408				0.0520303	0.0465005				0.00217078	0.000822613
	0.0231017	0.0391198				0.0267349	0.0180061				0.00061696	0.00655805
	0.00205653	0.00425017				0.0141215	0.0135046				0.00100542	0.0266207
	0.00246784	0.0322647				0.0462034	0.0194228				0.00143957	0.0330873
	0.00589539	0.00123392				0.0238558	0.0104655				0.000159952	0.000845463
	0.000297055	0.00706076				0.00712931	0.0233988				0.000274204	0.00934579
	0.00125677	0.00397596				0.0382972	0.0320133				0.000571259	0.00255924
	0.00772342	0.0698078				0.00457007	0.0098942				0.000685511	0.00619245
	0.00466147	0.00420446				0.0704933	0.071613				0.000799762	0.000228504
	0.000754062	0.00612389				0.140964	0.0241985				0.00463862	0.00230789
	0.00125677	0.016498				0.0188744	0.0349839				0.000959715	0.00271919
	0.00977995	0.00356466				0.00660375	0.00719786				0.000274204	0.0035418
	0.00356466	0.0153097				0.0419075	0.0109682				0.00509563	0.000571259
	0.0134132	0.0065352				0.0114252	0.026118				0.0988506	0.000159952
	0.00150812	0.00130247				0.003359	0.0137559				0.00162238	0.000159952
	0.000959715	0.00404451				0.0614446	0.0287686				0.630853	0.00148527
	0.000708361	0.000914014				0.0227133	0.00751777				0.0123163	0.000388456
	0.00063981	0.00333615				0.00607819	0.0699221				0.00137102	0.0231017
	0.000731211	0.00477572				0.0592738	0.0438955				0.0032219	0.000411306
	0.00879739	0.000731211				0.0775998	0.14334				0.0739437	0.000182803
	0.00219363	0.00610104				0.0905331	0.349565				0.00155382	0.00804332
	0.00418161	0.00383886				0.0135503	0.0182346				0.279597	0.00130247
	0.690195	0.0032676				0.00379316	0.137216				0.0065809	0.0573544
	0.0206567	0.00683226				0.00678655	0.0318534				0.00655805	0.00105112
	0.078788	0.00361036				0.0175262	0.0335443				0.00271919	0.000891164
	0.0956516	0.00265064				0.000365606	0.0343441				0.00319905	0.0393712
	0.00566689	0.00422732				0.012522	0.0522131				0.00767772	0.00877454
	0.00600964	0.0061696				0.00859173	0.0212051				0.00116537	0.0200626
	0.000982565	0.00683226				0.0284487	0.149921				0.000297055	0.00173663
	0.40797	0.00815758				0.00365606	0.0616503				0.0339099	0.0113566
	0.0114252	0.0231703				0.035738	0.019697				0.00310765	0.567032
	0.0063067	0.0441012				0.00669515	0.0330873				0.0110824	0.00555264
	0.00150812	0.0118365				0.0367662	0.0237187				0.00061696	0.000731211
	0.109727	0.00760917				0.0116537	0.0165437				0.00879739	0.0146242
	0.00178233	0.00674085				0.0368805	0.220346				0.00180518	0.308114
	0.00788337	0.0119279				0.00591824	0.0468204				0.00541553	0.0372232
	0.00518703	0.0381372				0.00381601	0.0878368				0.00470717	0.000251354
	0.000388456	0.0117908				0.0065352	0.0138016				0.00127962	0.017252
	0.000959715	0.0703334				0.00795192	0.00276489				0.0747664	0.0146928
	0.0111053	0.0206339				0.0128876	0.0483742				0.27064	0.0473231
	0.00463862	0.0096657				0.0310079	0.0138016				0.00763202	0.000548408
		0.022439					0.250828					0.015721
		0.0127048					0.108745					0.00566689
		0.0112424					0.00370176					0.00509563
		0.0351667					0.0136645					0.0173206
		0.00333615					0.0094372					0.00306195
		0.0620844					0.00710646					0.006718
		0.0138473					0.0353723					0.00249069
		0.0235359					0.00518703					0.00664945
		0.00870598					0.0662889					0.000594109
		0.0158124					0.00514133					0.00196513
		0.0358751					0.0147613					0.000457007
		0.259923					0.0116308					0.00863743
		0.00173663					0.0237187					0.00116537
		0.0262322					0.00637525					0.0199484
		0.0116765					0.0111053					0.00306195
		0.00217078					0.00265064					0.00134817
		0.0506821					0.00607819					0.103375
		0.00738066					0.0101456					0.00153097
		0.017869					0.0142815					0.00447867
		0.0166808					0.00854603					0.48132
		0.0742865					0.00278774					0.0104655
		0.0145557					0.00118822					0.23216
		0.0109225					0.00475287					0.0245641
		0.0346868					0.0145328					0.0137102
		0.0166579					0.0114023					0.00255924
		0.000525558					0.0591824					0.00153097
		0.00536983					0.0264607					0.00610104
		0.0065352					0.0204968					0.0358522
		0.0246327					0.0371547					0.00584969
		0.048717					0.00815758					0.0178233
		0.0419075					0.0127276					0.0248383
		0.00164523					0.0320362					0.00191943
		0.00669515					0.0348468					0.172794
		0.00377031					0.00680941					0.00139387
		0.0029934					0.0111053					0.00187373
		0.0099399					0.0359436					0.288691
		0.00559834					0.0249069					0.0328131
		0.027786					0.00717501					0.00230789
		0.00813473					0.0112652					0.00548408
		0.014053					0.00756347					0.0109453
		0.017869					0.0259123					0.342413
		0.003359					0.0300254					0.00235359
		0.00201083					0.0101456					0.754016
		0.00178233					0.0672486					0.00182803
		0.00898019					0.0178004					0.00265064
		0.00930009					0.083518					0.00518703
		0.00111967					0.111921					0.00121107
		0.00827183					0.0133218					0.0252268
		0.0581313					0.0117451					0.000685511
		0.0177547					0.00377031					0.000982565
		0.0269177					0.021982					0.00614674
		0.00242214					0.0638439					0.000251354
		0.0294541					0.0587254					0.000228504
		0.00171378					0.0063067					0.00642095
		0.174348					0.000228504					0.00258209
		0.00381601					0.0795649					0.00164522
		0.00228504					0.022142					0.000388456

## Sheet: Fig S1C
HC	Non-SF	SF-S	SF-D		Akkermansia relative abundance (log10-transformed)	TNF-α (log10 pg/ml)
24.219	12.42	82.485	75.789		-0.647142	1.5346
17.262	11.475	68.211	196.803		-2.67262	1.83385
21.222	18.243	78.489	36.855		-2.82156
16.281	15.3	77.994	195.282		-2.36927	1.89206
22.221	20.727	79.119	110.025		-1.07573	1.89828
15.3	39.258	118.539	64.152		-2.82156	2.07386
16.281	37.701	34.245	36.909		-2.39559	1.91637
10.539	47.034	151.65	161.946		-3.14975	2.18084
18.738	22.221	40.068	79.119		-1.43971	1.6028
23.715	28.233	54.549	49.599		-2.02832
	11.943	92.214	66.51		-2.49498	1.9648
	17.262	53.064	145.719		-1.7051	1.7248
	18.243	70.299	313.785		-2.24666	1.84695
	15.3	40.851	350.946		-2.08844	1.6112
	17.1	51.57	39.285		-3.13596
	32.247	47.097	70.299		-2.90871	1.67299
	16.281	151.2	39.285		-3.19395	2.17955
	25.218	131.67	75.789		-1.21917	1.5346
	58.95	105.93	39.285		-2.82819	2.02502
	19.728	82.485	93.753		-1.91113	1.91637
	20.223	86.868	44.235		-4.03905
	25.218	59.391			-2.99765	1.77372
	26.226	36.108			-2.71683	1.5576
	19.728	40.851			-3.09704	1.6112
	11.475	34.245			-4.03905	2.11949
		102.825			-4.34008	2.0121
		58.95			-1.3451	1.77048
		53.307			-1.45556	1.72678
		73.458			-2.22781	1.86604
		60.399			-2.71169	1.78103
		117.054			-2.18779	2.06839
		61.119			-3.64111	1.78618
		43.299			-3.43699	1.63648
		104.904			-2.9251	2.02079
		52.695			-3.59971	1.72177
		122.967			-1.15298	2.08979
		59.391			-2.56556
		60.399			-3.16399	1.41977
		26.289			-3.22613	1.78103
		68.841			-2.27938	1.83785
		59.985			-2.99765	1.77804
		94.95			-2.95091
		30.285			-1.03462	1.48123
		67.68			-3.56193	1.83046
		125.892			-2.91683	1.88575
		76.869			-3.86296	2.1
		192.69			-3.2609	2.28486
		76.869			-1.58573	1.88575
		45.504			-3.27938	1.65805
		81.351			-2.61992	1.91036
		42.417			-4.64111
		48.348			-3.34008	1.68438
		51.462			-4.34008
		34.245			-4.34008
		73.458			-4.03905	1.92774
		43.299			-1.90471	1.63648
		84.672			-1.99864
		68.913			-2.68207	1.64311
		43.965			-2.87026	1.65512
		45.198			-3.34008	1.78103
		60.399			-1.90952	1.7124
		51.57			-4.34008
		53.307			-3.52716	1.51725
		32.904			-4.16399
		143.874			-4.34008	1.75565
		56.97			-3.49498	1.68992
		48.969			-3.02832	1.3931
		24.723			-3.03905	1.84695
		70.299			-3.17871	1.7248
		53.064			-3.86296	2.49962
		48.195			-3.20974	1.93
		85.113			-3.46502	1.0228
		10.539			-2.83493	1.89481
		78.489			-2.81503	1.51522
		32.751			-1.78559
					-3.12259	1.683
		315.954			-2.9251	1.7248
		53.064			-1.57478	1.61539
		41.247			-2.55832	1.97947
		25.722			-3.73802	1.89226
		95.382			-2.39559	1.98448
		78.03			-3.41066	1.32679
		96.489			-2.01682	1.91982
		21.222			-2.70159	1.37502
		83.142			-3.46502	1.58273
		23.715			-2.82819	1.66478
		38.259			-3.17871
		46.215			-2.44245	1.76333
		52.128			-2.53052	1.5472
		57.987			-0.442725	1.74838
		35.253			-0.354808	1.71707
		56.025			-1.91847	1.70882
		52.128			-2.24666	1.4947
		51.147			-3.94214
		31.239			-3.2609	2.01956
		18.243			-0.444793	1.67241
		104.607			-2.47085	1.79479
		47.034			-2.10963	1.50849
		62.343			-1.06615	1.77048
		32.247			-1.3924	1.55944
		124.902			-2.31682	1.94307
		36.261			-0.917323	1.65805
		87.714			-2.26636	2.09657
		45.504			-0.927617	1.92774
		58.95			-1.89447	1.72678
		84.672			-1.84039	1.71707
		53.307			-2.37159
		52.128			-2.06592	1.2611
					-4.16399	2.15798
					-3.52716
					-1.42919	1.71707
					-3.2609
					-3.13596
					-3.38583
					-2.40306
					-3.94214
					-2.49498
					-3.27938
					-4.16399
					-2.30867
					-3.56193
					-3.29868
					-1.48912
					-4.16399
					-1.28127	1.72678
					-3.43699
					-3.41066
					-4.16399
					-3.14975
					-3.86296
					-3.12259
					-3.41066
					-0.176558	1.73679
					-2.82156
					-2.56193
					-1.76953	1.89481
					-2.64547
					-2.97835
					-1.59618	1.8383
					-1.15227	1.71149
					-2.94214	1.5346
					-0.60205	1.7124
					-2.16399
					-2.11606
					-3.10963
					-3.14975
					-3.64111
					-2.89292
					-2.76029
					-4.03905
					-1.99372
					-1.95003
					-1.16996	1.93886
					-2.45926
					-0.710617
					-2.95091
					-0.841147	1.77372
					-2.04341
					-2.56193
					-2.91683
					-1.35645	1.62754
					-3.49498
					-2.08844
					-3.02832
					-3.0848
					-4.64111
					-4.64111
					-3.79601
					-1.40913	1.97749
					-2.47974
					-1.93782
					-3.73802
					-2.79601
					-2.5339
					-2.76605
					-3.86296
					-1.12049
					-2.71683
					-3.2609
					-2.64547
					-3.09704
					-2.64988
					-2.65434
					-3.68686
					-3.64111
					-1.3658
					-1.2273
					-2.9251
					-3.0848
					-1.32682
					-3.94214
					-2.58803
					-1.22247
					-3.64111
					-2.87026
					-1.1014
					-3.38583
					-3.46502
					-3.34008
					-3.52716
					-4.03905
					-4.03905
					-3.05004
					-3.52716
					-3.36235
					-1.91438
					-4.16399
					-4.64111
					-3.52716
					-2.04782
					-2.78985
					-2.59971
					-0.593521
					-0.569299
					-3.46502
					-3.49498
					-2.59189
					-2.421
					-3.22613
					-1.31151
					-3.79601
					-1.24648
					-2.63679
					-2.84872
					-3.16399
					-3.34008
					-3.07291
					-0.605797
					-3.73802
					-0.751413
					-1.20718
					-2.47675	2.29066
					-3.14975	1.64577
					-3.59971	1.87961
					-2.29671	1.5665
					-4.03905
					-3.94214	2.20937
					-2.67262
					-2.87768	1.89828
					-3.0848	1.69547
					-2.47085
					-2.95987	1.82289
					-4.34008	2.16352
					-3.41066	2.04149
					-2.91683	1.84695
					-2.42362	1.59423
					-4.34008	2.54524
					-2.55832	1.59423
					-3.20974	1.87961
					-2.27375	1.97199
					-2.22447	1.59423
					-3.52716	2.29403
					-3.86296
					-1.72835	1.56713
					-4.34008	2.49663
					-3.10963
					-4.34008
