# Supplementary material
Source: publisher figshare collection journal article supplement (https://springernature.figshare.com/articles/dataset/_/21334422)
Supplement: Supplementary file 5 [file 1 › Source_Data_Extended_Data_Fig2.xlsx]

## Sheet: Fig S2A
Bacterial copies /mg faeces
PBS	Abx	FMT-S	FMT-D
7.51317	3.29329	4.38608	3.90033
8.19462	3.41521	4.30746	4.18964
6.9297	3.31382	4.30001	3.97572
8.71808	2.6303	4.54019	4.53192
7.46404	2.99745	4.14381	4.48356
7.71616	3.52133	4.02419	4.33605

## Sheet: Fig S2B
IL1b (Fold change)			IL6 (Fold change)			Viral load
Abx	M-FMT		Abx	M-FMT		Abx	M-FMT
19.93	14.88		39.72	23.9		4.90051	4.78859
15.16	13.14		49.43	30.53		4.70639	4.89596
34.55	1.38		55.96	1.25		5.14805	4.74255
40.88	14.83		112.3	52.26		5.09326	4.53107
70.39	6.38		55.04	31.57		4.72764	4.99456
12.02	13.63		62.29	41.89		5.32554	4.8719

## Sheet: Fig S2D
Bacterial copies /mg faeces
PBS.0d.s	PBS.0d.d	PBS.3d.s	PBS.3d.d
5.282	6.5862	8.22774	6.26517
5.65946	6.67964	6.647	5.70403
7.5814	5.75959	7.65435	5.03087
5.61445	5.20168	7.77054	7.34581

## Sheet: Fig S2E
Bacterial copies /mg faeces				Bacterial copies /mg faeces			Bacterial copies /mg faeces
Abx	A. muciniphila	p-A. muciniphila		Abx	L. reuteri		Abx	E. faecalis
2.24927	7.75062	6.20601		2.97818	6.02262		1.71925	7.36173
3.00348	8.11675	5.83585		2.65	5.98647		1.79089	7.17609
3.14955	8.1791	6.68603		2.65	5.17174		1.57441	7.04139
3.49703	7.68457	6.07481		2.65	6.12268		2.279	7.11394
				2.65	5.75824		1.94562	7.39794

## Sheet: Fig S2F
spleen log (genomic RNA copies/mg)
	PBS								ABX								AKK
3 dpi	3.99175	3.76057	3.75758	4.31397	4.3836	4.28559	3.77859	4.03167	4.4546	3.9113	4.23589	4.48204	4.16459	3.78508	4.47202	3.78877	3.97282	3.79359	3.4386	3.7401	3.81765	3.90555	3.5746	3.65008
5 dpi	4.03639	4.23904	4.56703	4.22074	4.78094	4.10479	4.1234	4.36544	4.65861	4.54619	5.08827	5.30825	4.5693	5.20769	4.5503	4.80258	4.3924	4.18484	3.95583	4.17145	3.77219	3.88591	4.24044	4.19162
Liver log (genomic RNA copies/mg)
	PBS								ABX								AKK
3 dpi	1.92757	2.33446	1.77509	1.95612	1.94584	1.93422	2.4975	2.3763	3.01452	2.49118	2.51181	2.77489	2.54018	1.96374	2.53253	2.23559	2.08811	1.9497	2.21529	1.93482	2.01485	2.11912	2.2214	1.907
5 dpi	3.93468	3.75433	4.11033	4.08774	3.30732	4.29717	4.23887	3.44735	3.49775	3.99741	4.26618	3.71259	4.39457	4.53395	3.32536	3.37536	3.99487	3.64057	3.44586	3.55937	3.42259	3.79349	4.15302	3.35028
lung log (genomic RNA copies/mg)
	PBS								ABX								AKK
3 dpi	1.7	1.90885	1.7	1.7	1.7	2.26904	1.7	2.28154	2.3968	2.29571	2.85296	2.01746	2.18994	1.94948	2.98667	1.7	2.04497	2.04805	1.7	1.7	1.91962	1.7	1.7	1.7
5 dpi	2.64301	2.93414	2.84594	4.05448	2.76236	4.03685	2.94129	3.31413	2.02452	2.45118	2.64791	4.33346	3.016	3.00102	3.15973	2.07203	2.53445	2.89408	2.11718	2.81366	2.67635	3.02981	2.87292	3.61234
