# Supplementary material
Source: publisher figshare collection journal article supplement (https://springernature.figshare.com/articles/dataset/_/21334422)
Supplement: Supplementary file 5 [file 1 › Source_Data_Extended_Data_Fig3.xlsx]

## Sheet: Fig S3A
IL-1B			IL-6
CDCA	GCDCA		CDCA	GCDCA
2.32	0.64		1.13	0.95
2.35	0.24		1.72	1.68
2.88	0.79		1.74	1.13

## Sheet: Fig S3B
IL-1B							IL-6
100μM CDCA	100μM GCDCA	SFTSV	100μM CDCA+SFTSV	100μM GCDCA+SFTSV			100μM CDCA	100μM GCDCA	SFTSV	100μM CDCA+SFTSV	100μM GCDCA+SFTSV
1.77	0.02	21.94	7.78	1.65			1.07	2.13	2.72	1.21	0.69
0.58	0.06	101.6	31.31	15.03			1.69	2.94	3.6	0.49	3.97
0.76	0.11	28.09	32.36	5.07			0.38	1.2	1.88	0.65	0.43
	0.19	79.7		17.89				1.32	2.57		3.05
	0.16	108.04		10.87				2.29	4.37		3.83
