# Supplementary material
Source: publisher figshare collection journal article supplement (https://springernature.figshare.com/articles/dataset/_/21334422)
Supplement: Supplementary file 5 [file 1 › Source_Data_Extended_Data_Fig5.xlsx]

## Sheet: Fig S5A
IL1b (Fold change)							IL6 (Fold change)
SFTSV	TCDCA+SFTSV	GCDCA+SFTSV	TCA+SFTSV	TDCA+SFTSV	T-α-MCA		SFTSV	TCDCA+SFTSV	GCDCA+SFTSV	TCA+SFTSV	TDCA+SFTSV	T-α-MCA+SFTSV
134.42	36.62	23.48	61.47	89.54	120.009		6.86	2.41	1.92	3.65	5.98	11.3066
177.93	40.4	45.09	68.29	48.75	117.082		5.4	3.78	1.93	4.25	4.88	12.1765
82.27	41.54	22.66	97.34	38.21	99.1462		6.39	3.45	2.71	5.81	5.34	11.2775
158.3	39.89	24.01	110.19	53.85	114.092		9.08	2.4	1.68	4.03	4.42	10.9351
					101.88		4.48	2.49	1.67	5.33	4.46	11.2159
					113.388		5.17	2.51	2.27	5.68	4.18	9.80219

## Sheet: Fig S5B
viral load (log10-transformed copies/ml)
SFTSV	TCDCA+SFTSV	GCDCA+SFTSV	TCA+SFTSV	TDCA+SFTSV	T-α-MCA+SFTSV
5.49322	5.14558	5.31991	5.34175	5.25289	5.15301
5.30014	5.20869	5.34378	5.20463	5.33133	5.05369
5.34677	5.1733	5.34378	5.23726	5.30349	5.30238
5.41243	5.30166	5.42189	5.29594	5.40361	5.17607
5.41255	5.29336	5.40977	5.2893	5.39755	5.01451
5.43346	5.36607	5.3365	5.22176	5.37351	4.81866

## Sheet: Fig S5C
IL1b (Fold change)						IL6 (Fold change)						Tnfa (Fold change)
SFTSV	1 uM TCDCA	10 uM TCDCA	50 uM TCDCA	100 uM TCDCA		SFTSV	1 uM TCDCA	10 uM TCDCA	50 uM TCDCA	100 uM TCDCA		SFTSV	1 uM TCDCA	10 uM TCDCA	50 uM TCDCA	100 uM TCDCA
40.75	34.15	26.79	17.84	12.72		532.87	557.69	439.47	401.28	256.4		10.66	9.02	7.85	9.17	7.08
25.48	27.73	23.67	14.16	14.44		609.96	586.82	526.32	383.79	295.62		8.92	9.78	7.99	7.21	6.63
33.08	32.15	22.9	17.55	16.75		469.74	635.08	511.57	428.81	290.77		11.05	10.28	8.29	7.54	6.1
31.34	30.51	22.44	19.51	11.22		561.79	439.9	371.01	412.12	209.9		9.91	9.92	10.98	9.41	7.11

## Sheet: Fig S5D
viral load (log10-transformed copies/ml)
SFTSV	1 uM TCDCA	10 uM TCDCA	50 uM TCDCA	100 uM TCDCA
4.94735	4.76384	4.74332	4.71954	4.69839
4.73533	4.88995	4.65419	4.58741	4.75651
4.66763	4.67613	4.74603	4.43196	4.64108
4.6717	4.68461		4.66252	4.65896

## Sheet: Fig 5E
TCDCA Content(ng/ml)
Abx	Abx+TCDCA
74.5977	439.843
49.5046	439.958
63.2657
72.3926

## Sheet: Fig 5F
liver log (genomic RNA copies/mg)
	Abx							Abx-TCDCA
3 dpi	2.44799	2.8323	3.21097	1.81646	1.85695	1.74756	1.85882	2.70628	2.21026	2.97898	2.8556	2.72389	2.21327	1.70401	2.43662
5 dpi	3.32403	3.31476	3.82547	2.22847	2.545			3.31486	3.94161	3.32637	3.86327	3.26199	2.71766	3.00868
spleen log (genomic RNA copies/mg)
3 dpi	4.37974	4.94516	4.97759	4.52984	4.76638	3.90174	5.15987	5.12672	4.27601	4.87295	5.0696	4.71133	3.97303	4.79452	4.94458	4.00069	4.93292
5 dpi	4.64029	4.85716	5.64378	4.17136	4.15233			4.54591	4.71455	4.79319	5.10141	4.57942	4.54896	5.0766
