# Supplementary material
Source: publisher figshare collection journal article supplement (https://springernature.figshare.com/articles/dataset/_/21334422)
Supplement: Supplementary file 5 [file 1 › Source_Data_Extended_Data_Fig6.xlsx]

## Sheet: Fig S6A
TCH μmol/g liver
PBS	Abx	A. muciniphila
12.0822	13.0723	19.94
8.92657	16.1043	17.6979
12.1304	10.5705	10.6498
12.6322	15.5043	10.3659
10.5785		13.0062

## Sheet: Fig S6B
Asbt (Fold change)
PBS	Abx	A. muciniphila
0.87	2.68	1.88
1.21	2.47	2.25
1.16	2.11	1.54
0.82	2.99	2.72
1.45	2.75	4.25

## Sheet: Fig S6C
Baat (Fold change)
PBS	Abx	A. muciniphila	L. reuteri
1.33	1.22	1.44	0.96
0.93	0.63	1.42	0.69
0.98	1.13	1.4	1.1
0.85	0.64	1.4	1.09
0.96	0.85	1.68	0.79

## Sheet: Fig S6D
Relative amount of protein
	PBS			Abx			AKK			L. Reuteri
CYP7A1	0.784131	1	0.989757	0.795636	0.859333	0.810873	0.838988	1.03386	0.849438	0.843994	0.733144	0.897998
CYP8B1	0.727335	1	0.94137	1.23836	0.705228	0.691627	0.959343	1.08721	1.21384	1.08202	1.01517	1.2285
CYP27A1	0.964907	1	1.05102	1.3855	0.901549	0.977017	0.980113	1.24334	1.30899	1.81056	1.6246	1.75793
CYP7B1	0.797907	1	0.959305	1.21185	0.762133	0.966005	1.03116	1.11798	1.17775	1.08056	0.944447	0.762446
BACS	0.769584	1	0.964822	1.94392	1.15881	1.28204	1.16663	1.52363	1.75548	2.10511	2.30288	1.84966
BAAT	1	2.41673	2.08538	1.2048	1.03057	0.932648	6.24343	6.16159	6.35793	3.56003	2.41952	2.14964

## Sheet: Fig S6E
Baat (Fold change)
GF	A. muciniphila
0.91	1.18
0.74	1.02
1.04	1.39
0.81	1.11
1.01	1.08
0.9	1.14

## Sheet: Fig S6F
Relative amount of protein
	GF			AKK
CYP7A1	1	0.828646	0.834927	0.694736	0.793216	0.949161
CYP8B1	1	1.09022	1.04177	0.958386	0.915606	1.26953
CYP27A1	0.978065	0.93958	1	0.908109	1.03797	1.54675
CYP7B1	1	1.06912	1.14271	1.13241	1.08809	1.05887
BACS	1	0.962131	1.02893	1.36213	1.41862	2.19382
BAAT	1	1.72968	3.44859	4.84363	6.20524	5.83432

## Sheet: Fig S6G
Content(ng/ml)
	Abx						A. muciniphila						L. reuteri
CA	4.0716	3.60025	4.14636	4.14304			1.88887	2.66621	2.24014	1.54584			3.28	8.63	1.91	4.89
CDCA							11.4958	16.1395	17.4819
α-MCA	8.9966	8.12481	2.34887	4.83193			2.01378	4.03494	1.25573	4.53824			6.3	28.28
β-MCA	5.42617	2.73603	2.23485	2.66663	2.82579		5.63063	6.61953	5.20308	4.57959			13.4583	10.2526	12.2282
T-α-MCA	51.1017	49.6026	41.9754	34.5063			102.17	265.017	174.407	109.065			84.8411	59.6091	120.399
TCA	198.958	207.701	179.422	177.622			210.58	427.428	379.266	286.75			240.603	201.262	215.14
TCDCA	74.4592	92.5387	39.7856	41.5318			135.729	120.699	94.7515	118.767	105.907		14.1238	12.8262	16.74

## Sheet: Fig S6H
Baat (Fold change)
BHI	100KDa	50-100KDa	10-50KDa	10KDa	S-AKK
0.84	0.96	1.01	0.99	1.62	1.56
0.92	0.81	0.94	1.55	1.69	1.6
0.91	1.67	0.93	1.17	2.42	1.56
1.29	1.17	1.18	0.95	1.5	2.17
1.12	1.11	1.33	1.37	1.51	1.73
1.29	1.23	1.13	1.09	1.69	1.83

## Sheet: Fig S6I
Proteinase K treatment
Baat (Fold change)					Baat (Fold change)
BHI	10 ug/ml 10 KDa	100 ug/ml 10 KDa	1 mg/ml 10 KDa		BHI	10 ug/ml 10 KDa	100 ug/ml 10 KDa	1 mg/ml 10 KDa
1.02	1.45	1.02	1.49		1.18	1.23	1.68	1.95
0.93	1.17	1.15	1.87		1.29	0.86	2.6	2.97
1.06	1.16	1.48	1.45		0.97	0.97	1.97	3.59
0.66	0.84	1.59	2.05		0.86	1.9	1.65	1.74
1.2	0.83	1.59	1.34		1.19	0.94	1.45	1.08
0.82	0.91	1.24	1.56		1.03	1.12	1.48	2.01

## Sheet: Fig S6J
Content (mmol/L)
Acetate	Propionate
9.71	2.12
10.37	3.61
15.53	2.72
12.67	2.94
