# Supplementary material
Source: publisher figshare collection journal article supplement (https://springernature.figshare.com/articles/dataset/_/21334422)
Supplement: Supplementary file 5 [file 1 › Source_Data_Extended_Data_Fig7.xlsx]

## Sheet: Fig S7A
Compound_ID	Name	Formula	Molecular Weight	RT [min]	m/z	mzCloud_Results	mzVault_Results	MassList_Results	neg_BHI	neg_AKK_10KDa		Compound_ID	Name	Formula	Molecular Weight	RT [min]	m/z	mzCloud_Results	mzVault_Results	MassList_Results	pos_BHI	pos_AKK_10KDa
Com_1363_neg	4-((5-(4-Nitrophenyl)oxazol-2-yl)amino)benzonitrile	C16 H10 N4 O3	306.078	5.011	305.07	Invalid mass	No results	No results	626368	6.17646e+08		Com_6958_pos	20-Dihydro 6α-methylprednisone	C22 H30 O5	374.207	13.113	375.214	Invalid mass	No results	No results	117483	7.15912e+07
Com_1814_neg	13,14-dihydro-15-keto Prostaglandin D1	C20 H34 O5	390.212	3.402	389.204	Invalid mass	No results	No results	1.76515e+06	4.42221e+08		Com_2065_pos	Harmaline	C13 H14 N2 O	214.111	10.313	215.118	Full match	No results	No results	2.60434e+06	3.35625e+08
Com_82_neg	3,8,9-trihydroxy-10-propyl-3,4,5,8,9,10-hexahydro-2H-oxecin-2-one	C12 H20 O5	245.138	1.98	244.13	Invalid mass	No results	No results	3.92523e+07	9.68932e+09		Com_3409_pos	3-methylcrotonylglycine	C7 H11 N O3	157.074	8.433	158.081	Full match	No results	No results	2.39698e+06	1.82437e+08
Com_258_neg	Prolylleucine	C11 H20 N2 O3	228.148	3.478	227.14	Full match	No results	Full match	1.73481e+07	3.56889e+09		Com_227_pos	DL-2-(acetylamino)-3-phenylpropanoic acid	C11 H13 N O3	207.089	9.511	208.097	Full match	Full match	Full match	5.29944e+07	4.03269e+09
Com_2492_neg	Xanthosine	C10 H12 N4 O6	284.076	2.513	283.068	Full match	Full match	Full match	1.52471e+06	3.03168e+08		Com_3201_pos	4-(Diethylamino)salicylaldehyde	C11 H15 N O2	193.11	9.758	194.118	Full match	No results	No results	2.89885e+06	1.96152e+08
Com_1275_neg	Phytic acid	C6 H18 O24 P6	659.862	1.065	328.924	Full match	No results	No results	3.4189e+06	6.65174e+08		Com_344_pos	N-Acetylmethionine	C7 H13 N O3 S	191.062	7.402	192.069	No results	Full match	Full match	4.22081e+07	2.64468e+09
Com_4677_neg	Syringic acid	C9 H10 O5	198.053	3.135	197.046	Full match	Full match	Full match	859118	1.44462e+08		Com_5189_pos	Cer-NS (d18:1/24:0)	C42 H83 N O3	649.637	14.46	650.645	No results	Full match	No results	1.97585e+06	1.06688e+08
Com_2583_neg	Ouabain	C29 H44 O12	630.287	3.732	629.279	Invalid mass	No results	No results	1.83773e+06	2.91994e+08		Com_8476_pos	1-(1-isopropyl-4-piperidyl)-1H-1,2,3-benzotriazole	C14 H20 N4	244.167	12.9	245.174	Invalid mass	No results	No results	1.0761e+06	5.42561e+07
Com_3674_neg	N-[4-(2-methyl-1,3-thiazol-4-yl)phenyl]-2-thiophenecarboxamide	C15 H12 N2 O S2	300.042	3.722	299.034	Invalid mass	No results	No results	1.32131e+06	1.95007e+08		Com_31549_pos	6-(7-methyloctyl)-1H,3H,4H,6H-furo[3,4-c]furan-1-one	C15 H24 O3	252.17	12.98	253.177	Invalid mass	No results	No results	86169.1	3.47283e+06
Com_5_neg	N-Acetyl-D-alloisoleucine	C8 H15 N O3	127.1	6.896	126.093	Invalid mass	Invalid mass	No results	8.16158e+08	9.13212e+10		Com_12677_pos	SM (d14:1/29:0)	C48 H97 N2 O6 P	828.708	16.018	829.716	No results	Full match	No results	741024	2.95425e+07
Com_1462_neg	D(-)-Amygdalin	C20 H27 N O11	457.159	7.919	456.152	Full match	No results	No results	5.53866e+06	5.68894e+08		Com_26256_pos	4-(5-pentylpyrimidin-2-yl)benzonitrile	C16 H17 N3	251.142	12.231	252.149	Full match	No results	No results	197668	6.6229e+06
Com_8_neg	N-Acetyl-L-phenylalanine	C11 H13 N O3	207.09	7.578	206.082	Full match	Full match	Full match	4.85247e+08	4.37465e+10		Com_18272_pos	Ip7G	C16 H23 N5 O5	365.17	10.986	366.177	No results	No results	Full match	474933	1.54423e+07
Com_25_neg	N-Acetyl-L-methionine	C7 H13 N O3 S	191.062	4.581	190.055	Full match	Full match	Full match	2.6696e+08	2.38496e+10		Com_4348_pos	N-(2-morpholinophenyl)-2-furamide	C15 H16 N2 O3	272.119	2.166	273.127	Invalid mass	No results	No match	4.83016e+06	1.34468e+08
Com_3667_neg	2-Hydroxycinnamic acid	C9 H8 O3	164.048	4.035	163.04	Full match	Full match	Full match	2.32662e+06	1.95659e+08		Com_972_pos	N-Acetyl-DL-valine	C7 H13 N O3	159.09	7.584	160.097	No results	Full match	Full match	3.09839e+07	8.34484e+08
Com_6782_neg	Uric acid	C5 H4 N4 O3	168.029	1.497	167.021	Full match	Full match	Full match	1.16822e+06	9.06108e+07		Com_15682_pos	6,7,8-trimethoxy-2-(2-phenoxy-3-pyridyl)-4H-3,1-benzoxazin-4-one	C22 H18 N2 O6	444.076	16.732	445.083	Invalid mass	No results	No results	787498	2.06087e+07
Com_3208_neg	2-Isopropylmalic acid	C7 H12 O5	176.069	2.465	175.061	Full match	Full match	Full match	3.09374e+06	2.2957e+08		Com_190_pos	Glutaric Acid	C5 H8 O4	132.042	2.536	133.05	No results	No results	Full match	2.36479e+08	4.68022e+09
Com_1763_neg	2-Hydroxy-4-methylthiobutanoic acid	C5 H10 O3 S	150.035	2.418	149.028	Full match	No results	No results	7.21783e+06	4.54423e+08		Com_14410_pos	4-(2,3-dihydro-1,4-benzodioxin-6-yl)butanoic acid	C12 H14 O4	222.089	11.438	223.096	Full match	No results	Full match	1.25503e+06	2.38302e+07
Com_3998_neg	5-Methyldeoxycytidine	C10 H15 N3 O4	241.106	2.521	240.099	Full match	No results	Full match	3.17547e+06	1.75203e+08		Com_555_pos	Methylmalonate	C4 H6 O4	118.027	2.549	119.034	No results	No results	Full match	8.53314e+07	1.61233e+09
Com_8617_neg	Thymidine 5'-monophosphate	C10 H15 N2 O8 P	322.057	2.066	321.05	Full match	Full match	Full match	1.2963e+06	6.64983e+07		Com_31439_pos	TPH	C15 H23 N5 O5	335.163	12.458	336.17	Invalid mass	No results	No results	202678	3.51934e+06
Com_404_neg	N-Acetyl-L-leucine	C8 H15 N O3	173.105	6.459	172.098	Full match	Full match	Full match	5.48528e+07	2.23414e+09		Com_17160_pos	Taurocholic acid	C26 H45 N O7 S	515.292	9.921	516.299	No results	No results	Full match	1.04926e+06	1.74928e+07
Com_203_neg	Mevalonic acid	C6 H12 O4	148.074	2.011	147.067	Full match	No results	Full match	1.37838e+08	4.5766e+09		Com_11293_pos	DL-Panthenol	C9 H19 N O4	205.132	5.489	206.139	No results	No results	Full match	2.45627e+06	3.53269e+07
Com_11891_neg	2-(2-pyridyl)-2-{2-[4-(trifluoromethoxy)phenyl]hydrazono}acetonitrile	C14 H9 F3 N4 O	306.078	5.19	305.07	Invalid mass	No results	No results	1.29332e+06	4.24773e+07		Com_28924_pos	Lidocaine N-oxide	C14 H22 N2 O2	250.168	11.77	251.175	Full match	No results	No results	343407	4.78731e+06
Com_7583_neg	Citraconic acid	C5 H6 O4	130.027	2.174	129.02	No results	No results	Full match	2.50891e+06	7.85967e+07		Com_3453_pos	2,3,5,6-Tetramethylpyrazine	C8 H12 N2	136.1	10.04	137.107	Full match	No results	No results	1.47201e+07	1.79769e+08
Com_5273_neg	Nitrazepam-d5	C15 H6 [2]H5 N3 O3	286.11	1.983	285.103	Full match	No results	No results	3.98386e+06	1.24512e+08		Com_16984_pos	Pilocarpine	C11 H16 N2 O2	208.121	11.364	209.128	Full match	No results	No results	1.48141e+06	1.78073e+07
Com_2712_neg	Gibberellic acid	C19 H22 O6	346.138	5.701	345.131	Invalid mass	No results	No results	8.92066e+06	2.75974e+08		Com_28982_pos	(S,S)-2,6-bis-(4-isopropyl-4,5-dihydro-1,3-oxazol-2-yl)pyridine	C17 H23 N3 O2	301.179	12.59	302.186	Full match	No results	No results	438982	4.86794e+06
Com_19612_neg	5-S-cysteinyldopaquinone	C12 H14 N2 O6 S	314.056	2.29	313.049	No results	No results	Full match	727550	1.92917e+07		Com_32828_pos	Oxytetracycline	C22 H24 N2 O9	482.126	15.388	483.133	Invalid mass	No results	No results	259282	2.84595e+06
Com_5788_neg	Isoproterenol	C11 H17 N O3	211.121	8.134	210.114	No results	No results	Full match	4.2327e+06	1.10446e+08		Com_3151_pos	4-(1-adamantyl)-2-methyl-1,3-thiazole	C14 H19 N S	233.126	3.629	234.134	Invalid mass	No results	No results	2.01869e+07	2.00511e+08
Com_4602_neg	JWH 018 N-pentanoic acid metabolite	C24 H21 N O3	407.133	2.573	406.126	Invalid mass	No results	No results	5.7349e+06	1.47684e+08		Com_11208_pos	[4-(tert-butyl)phenyl](1H-imidazol-2-yl)methanone	C14 H16 N2 O	228.126	11.171	229.134	Full match	No results	No results	3.9248e+06	3.56567e+07
Com_25874_neg	HBMP (18:2-22:6-22:5)	C68 H107 O11 P	1130.76	16.743	1129.75	No results	Full match	No results	458323	1.11686e+07		Com_905_pos	N1-[4-hydroxy-6-(methoxymethyl)pyrimidin-2-yl]acetamide	C8 H11 N3 O3	197.08	1.521	198.087	Full match	Full match	Full match	1.03568e+08	8.97625e+08
Com_8113_neg	4-Hydroxybenzoic acid	C7 H6 O3	138.032	2.261	137.025	No results	No results	Full match	3.0897e+06	7.21244e+07
Com_6125_neg	L-Carnitine	C7 H15 N O3	161.105	1.467	160.098	No results	No results	Full match	4.42388e+06	1.02545e+08
Com_6809_neg	2,3-dihydro-5-nitro-2-spiro(cyclohexyl)benzimidazole	C12 H15 N3 O2	251.127	10.527	232.109	Invalid mass	No results	No results	4.15678e+06	9.00624e+07
Com_4228_neg	Gly-Phe	C11 H14 N2 O3	222.101	4.57	221.093	No results	No results	Full match	7.55773e+06	1.63121e+08
Com_8530_neg	Androsterone glucuronide	C25 H38 O8	466.255	8.15	465.247	Full match	No results	No results	3.15882e+06	6.73622e+07
Com_859_neg	DL-4-Hydroxyphenyllactic acid	C9 H10 O4	182.058	2.276	181.051	Full match	Full match	Full match	5.04335e+07	9.92304e+08
Com_5405_neg	Tetradecanedioic acid	C14 H26 O4	258.184	11.517	257.176	Full match	No results	Full match	6.01843e+06	1.14601e+08
Com_149_neg	N-Acetyl-DL-norvaline	C7 H13 N O3	159.09	3.805	158.082	Full match	Full match	Full match	3.33593e+08	6.08237e+09
Com_8793_neg	4-Hydroxy-3-methylbenzoic acid	C8 H8 O3	152.048	2.822	151.04	No results	No results	Full match	3.88703e+06	6.47397e+07
Com_28_neg	Succinic acid	C4 H6 O4	118.027	1.269	117.02	Full match	Full match	Full match	1.51855e+09	2.28068e+10
Com_3548_neg	Raffinose	C18 H32 O16	564.191	1.539	563.183	No results	Invalid mass	No results	1.36819e+07	2.04154e+08
Com_5760_neg	Azelaic acid	C9 H16 O4	188.105	5.545	187.098	Full match	Full match	Full match	6.48993e+06	9.31509e+07
Com_18855_neg	D-3-Phenyllactic acid	C9 H10 O3	166.063	4.909	165.056	No results	No results	Full match	1.75668e+06	2.06617e+07
Com_1459_neg	2-(acetylamino)-3-(1H-indol-3-yl)propanoic acid	C13 H14 N2 O3	246.101	7.77	245.094	Full match	Full match	Full match	5.17138e+07	5.69509e+08
Com_3672_neg	Indole-3-lactic acid	C11 H11 N O3	169.098	6.721	168.091	Invalid mass	Invalid mass	No results	1.94858e+07	1.95212e+08

## Sheet: Fig S7B
A. muciniphila (x109 CFU)	HAL (ng/mL)
0	0
2	0.529914
6	1.58546

## Sheet: Fig S7C
Baat (Fold change)
Huh-7	0.1 uM HAL	1 uM HAL	10 uM HAL	20 uM HAL	100 uM acetate
1.04	1.37	1.49	1.39	1.86	0.85
1.01	1.47	1.45	1.66	2.36	0.97
1.17	1.22	1.3	1.23	2.24	1.02
1.05	1.35	1.42	1.46	1.74	0.98
1	1.28	1.83	1.21	1.46	1.03

## Sheet: Fig S7D
Baat (Fold change)
MPH	0.1 uM HAL	1 uM HAL	10 uM HAL	20 uM HAL	100 uM Acetate
0.72	2.01	1.23	3.23	0.71	1.37834
1.53	2.25	2.83	2.38	1.52	1.19289
0.46	2.08	1.8	2.81	0.82	1.12282
0.68	1.33	1.34	2.88	0.72	1.11247
0.79	1.48	1.75	4.56	2.71	1.09175

## Sheet: Fig S7E
Baat (Fold change)
siNC	siBAAT
0.93	0.59
1.22	0.64
0.88	0.45
1.11	0.4
0.99	0.39
1.08	0.42

## Sheet: Fig S7F
Baat (Fold change)
PBS	Abx	HAL	Acetate
1.05	0.77	2.93	1.56
0.93	0.82	3.13	1.75
1.19	0.88	2.56	1.9
1.13	0.69	2.3	1.49
0.97	1.12	2.35	1.05
0.91	1.57	2.35	0.83

## Sheet: Fig S7G
Relative amount of protein
	PBS			Abx			HAL			Acetate
CYP7A1	0.97023	1	1.0562	0.972797	0.924584	0.968217	0.744469	0.843086	0.697381	0.713999	0.747338	0.68296
CYP8B1	0.926204	1	0.946316	1.12917	1.00634	1.2229	1.04273	1.03033	0.895247	0.605559	0.7088	0.694112
CYP27A1	0.881631	1	0.934211	1.17135	1.17997	1.35358	1.13614	1.20723	1.08859	0.878689	0.81484	0.729681
CYP7B1	0.809144	1	1.02137	1.07476	0.960925	1.0528	0.781039	0.808806	0.725529	0.640124	0.715212	0.549182
BACS	1	0.824677	0.827793	0.982836	0.98306	1.03346	0.783516	0.917753	0.783741	1.0406	1.16495	1.11107
BAAT	4.21538	3.49742	2.73492	1	0.524073	1.12727	3.29437	3.76118	3.0015	0.548288	0.677474	0.872522
