# Supplementary material
Source: publisher figshare collection journal article supplement (https://springernature.figshare.com/articles/dataset/_/21334422)
Supplement: Supplementary file 5 [file 1 › Source_Data_Extended_Data_Fig8.xlsx]

## Sheet: Fig S8A
Content(ng/ml)
	Abx								HAL
CA	2.94447	3.34937	1.30079	2.28286					4.8341	9.05059	4.93084	9.37196	8.95432	8.39952	4.81326
CDCA									11.8807	1.09386	3.9974	8.03761	29.0598	30.6437
α-MCA	8.9966	6.95512	4.24217	2.43335					4.40754	21.8392	11.7562	28.1428	16.9671	18.5405	5.6734
β-MCA	5.57265	2.29815	88.1428	65.0788	3.04516				95.2076	445.192	147.073	132.976	338.891	162.464	180.135	60.0921
T-α-MCA	85.3907	91.2327	154.332	106.057					253.776	314.899	225.861	331.258	241.336	251.961
TCA	290.772	111.219	137.592	349.225					409.91	425.255	259.685	464.608	329.727	332.113
TCDCA	0.218537	0.100088	45.4651	85.1322	0.213443				32.492	253.867	410.878	129.27	332.162	249.406	226.54	71.9999

## Sheet: Fig S8B
Content(ng/ml)
	GF								A. muciniphila								HAL
CA	1.0506	5.60229	0.894398						2.23325	0.942639	0.692016	2.62802	0.60854	0.554204			1.48656	3.11575	0.773983	1.24911
CDCA	0.881503	3.92922	5.32407	4.34452	7.24671	4.871	5.20677		6.05404	5.76715	5.59379	3.37548	2.8455	1.58231			12.6122
α-MCA	0.563645	1.97278	5.90703	4.14135	5.39294	2.71255	9.75366	3.99355
β-MCA	9.07443	28.5258	38.0111	21.8173		10.9878	23.3469		41.2467	6.41596	22.9921	32.1606	19.3039	10.635	4.70959	8.53975	26.2356	17.0704	18.5504	23.5236	11.125	5.37402	15.7095
T-α-MCA	42.6471	155.734	151.156	64.8326		34.0578	90.1683		16.2397	178.318	151.559	101.084	59.1408	23.0323	27.2967		172.321	53.537	95.1933	80.8367	44.4417	26.5107	67.889
TCA	369.655	1800.85	1592.84	863.557		345.442			2390.61	3069.82	2344.34	1602.58	451.336	315.275	516.494		3507.94	1155.35	1150.19	1292.14	1121.15	266.595	517.907
TCDCA	10.7292	9.52376	9.47141						191.115	132.424	131.054	161.927	204.264				15.9204	12.3641	19.1756	13.1157

## Sheet: Fig S8C
HAL Content(ng/ml)
PBS	Abx	A. muciniphila	L. reuteri	HAL
NA	NA	0.845226	NA	10.4209
NA	NA	0.85946	NA	10.7734
NA	NA	0.1	NA	7.21131

## Sheet: Fig S8D
HAL Content(pg/ml)
HC	SFTS
9.92	9.19
6.84	11.45
7.3	10.38
7.4	9.96
5.46	9.63
5.75	7.85
6.21352	7.26
6.83778	6.57
7.30246	10.36
7.39534	7.31
8.09861	8.61
9.30225	14.62
9.92282	11.81

## Sheet: Fig S8G
	DMSO						Pre-HAL						HAL
IL6	388.34	335.44	436.61	290.3	349.25	458.43	480.93	402.59	474.39	353.05			316.53	323.39	284.68	299.06	352.3
Ilb	0.25	0.27	0.25	0.28	0.35	0.14	0.15	0.25	0.22	0.37	0.22	0.12	0.12	0.22	0.18	0.16	0.07	0.32
Tnfa	0.29	0.31	0.33	0.29	0.29	0.17	0.16	0.28	0.24	0.46	0.27	0.18	0.16	0.24	0.19	0.19	0.12	0.34
viral load	4.03169	3.78074	3.95754	3.77945	3.95719	4.14108	3.72833	3.66319	3.31275	4.04389	3.90366		4.24252	3.94123	3.92689	3.90831	3.75843
