# Supplementary material
Source: publisher figshare collection journal article supplement (https://springernature.figshare.com/articles/dataset/_/21334422)
Supplement: Supplementary file 5 [file 1 › Source_Data_Extended_Data_Fig9.xlsx]

## Sheet: Fig S9A
IL1B (Fold change)
50uM GCDCA	100uM GCDCA	150uM GCDCA	SFTSV	50μM GCDCA+SFTSV	100μM GCDCA+SFTSV	150μM GCDCA+SFTSV
1.86	2.29	6.45	244.77	150.82	67.06	90.03
1.22	2.07	6.28	101.62	80.24	31.44	34.95
1.58	1.31	3.55	169.5	53.25	22.53	29.2
IL6 (Fold change)
50uM GCDCA	100uM GCDCA	150uM GCDCA	SFTSV	50μM GCDCA+SFTSV	100μM GCDCA+SFTSV	150μM GCDCA+SFTSV
1.59	3.18	12.33	63.14	67.61	15.14	42.63
1.15	3.02	6.06	36.99	58.76	18.48	12.56
2.89	2.88	4.27	80.53	51.48	20.57	14.34

## Sheet: Fig S9B
	IL-1β (Fold change)				IL-6 (Fold change)
	SFTSV	100μM GCDCA+SFTSV			SFTSV	100μM GCDCA+SFTSV
	0.459828	0.199227			0.213915	0.0404115
	1.48139	0.118972			1.51003	0.0944149
	5.68171	0.245718			1.07977	0.0980288

## Sheet: Fig S9C and S9D
IL1B (Fold change)									viral load
10uM CDCA	50uM CDCA	100uM CDCA	SFTSV	10μM CDCA+SFTSV	50μM CDCA+SFTSV	100μM CDCA+SFTSV			SFTSV	10μM CDCA+SFTSV	50μM CDCA+SFTSV	100μM CDCA+SFTSV
2.78	5.97	26.79	160.1	334.68	511.33	566.62			5.43	5.81	5.92	5.91
3.32	7.07	23.86	188.61	321.6	483.21	591.07			5.5	5.54	6.16	5.97
2.58	8.24	18.2	156.32	249.91	162.34	674.6			5.81	5.69	6.52	5.79
									5.86	5.69	5.92	6.07
									5.63	5.6	5.67	5.36
IL6 (Fold change)									5.86	6.05	5.95	5.8
10uM CDCA	50uM CDCA	100uM CDCA	SFTSV	10μM CDCA+SFTSV	50μM CDCA+SFTSV	100μM CDCA+SFTSV
1.27	1.73	2.96	32.41	52.23	56.35	61.45
1.67	1.08	1.49	48.87	70.81	76.16	64.33
1.35	1.13	0.6	21.84	60.17	54.36	21.96
