# Supplementary material
Source: publisher figshare collection journal article supplement (https://springernature.figshare.com/articles/dataset/_/21334422)
Supplement: Supplementary file 5 [file 1 › Source_Data_Extended_Data_Fig10.xlsx]

## Sheet: Fig S10A
IL1B (Fold change)
shctrl+GCDCA	shctrl+SFTSV	shctrl+GCDCA+SFTSV	shTLR8+GCDCA	shTLR8+SFTSV	shTLR8+GCDCA+SFTSV	shMyD88+GCDCA	shMyD88+SFTSV	shMyD88+GCDCA+SFTSV
0.16	34.28	1.96	0.07	25.65	3.05	0.65	1.41	2.8
0.15	19.9	2.6	0.06	21.57	1.28	0.95	6.56	1.96
0.18	25.01	1.91	0.04	15.48	1.22	1.01	7.77	2.72
0.18	48.63	2.53	0.02	7.06	0.92	0.36	4.58	0.73
0.16	19.04	2.66	0.04	4.9	0.62	0.29	6.18	1.05
0.18	26.23	2.27	0.05	10.82	1	0.33	5.49	0.74
IL6 (Fold change)
shctrl+GCDCA	shctrl+SFTSV	shctrl+GCDCA+SFTSV	shTLR8+GCDCA	shTLR8+SFTSV	shTLR8+GCDCA+SFTSV	shMyD88+GCDCA	shMyD88+SFTSV	shMyD88+GCDCA+SFTSV
0.41	18.45	1.86	2.7	44.6	8.05	1.53	11.07	8.9
0.54	11.11	3.58	0.78	12.32	2.38	1.26	6.23	2.53
0.49	11.51	1.89	0.43	3.71	1.64	1.89	2.46	3.34
0.55	15.69	1.86	1.48	37.47	9.03	0.93	2.19	2.33
0.5	8.05	2.2	0.38	19.37	3.25	0.15	0.44	0.79
0.57	15.15	2.72	1.23	43.51	6.04	1.2	9.04	3.52

## Sheet: Fig S10C
P50
	SFTSV			SFTSV+GCDCA
cellular	2.72957	1.16621	1.3567	1.21774	0.809729	1.435
cytosolic	1.92197	0.9608	0.8742	1.0912	0.22227	0.365
nuclear	2.3417	1.2562	1.2647	1.39806	0.253748	0.543
P65
	SFTSV			SFTSV+GCDCA
cellular	1.87445	0.924	1.653	1.92543	1.00887	0.987
cytosolic	1.48651	1.0692	1.567	4.29434	0.545955	0.675
nuclear	2.17681	1.0692	1.778	0.796897	0.545955	0.553
P-P65
	SFTSV			SFTSV+GCDCA
cellular	3.96156	1.95283	2.234	1.95184	1.02271	1.874
cytosolic	3.86914	6.14476	2.879	1.20016	3.60968	1.077
nuclear	1.57003	3.2776	2.124	0.65255	1.46346	0.987

## Sheet: Fig S10E
viral load
sictrl+SFTSV	sictrl+GCDCA+SF	siTGR5+SFTSV	siTGR5+GCDCA+SFTSV
4.63	4.99	4.57	4.34
4.75	4.96	4.71	4.52
4.59	4.61	4.62	4.62
5	5.33	5.04	5.2
4.96	5.33	4.99	5.38
5.04	5.41	5.1	5.22

## Sheet: FigS10F
pro-IL-1β
	SFTSV			SFTSV+GCDCA
TGR5+/+	10.9216	6.92645	8.205	7.57004	2.86401	3.034
TGR5-/-	11.1309	5.14085	7.613	16.2398	4.45459	6.703
TGR5
	SFTSV			SFTSV+GCDCA
TGR5+/+	1.02913	0.874394	1.233	1.17035	0.894652	1.032
TGR5-/-	0.460745	0.401521	1.566	0.497201	0.562193	0.604
P50
	SFTSV			SFTSV+GCDCA
TGR5+/+	0.812219	1.06479	1.267	0.672168	0.768722	0.685
TGR5-/-	2.8184	0.973484	1.867	2.40369	1.10899	0.974
P65
	SFTSV			SFTSV+GCDCA
TGR5+/+	1.12947	0.473021	1.23	1.46196	0.503798	1.388
TGR5-/-	1.18784	1.02364	1.458	1.72664	1.23908	1.233
P-P65
	SFTSV			SFTSV+GCDCA
TGR5+/+	2.7734	1.23372	2.365	0.591498	0.206569	0.723
TGR5-/-	1.5268	1.3441	2.385	1.65195	1.38707	1.678

## Sheet: FigS10G
IL1B (Fold change)
sictrl			siFXR
100μM GCDCA	SFTSV	100μM GCDCA+SFTSV	100μM GCDCA	SFTSV	100μM GCDCA+SFTSV
0.09	10.82	2.12	0.16	3.18	1.13
0.16	26.89	6.33	0.2	3.44	0.87
0.14	6.94	2.16	0.28	4.15	1.65
0.56	9.6	2.84	0.31	4.09	2.23
0.55	8.55	3.35	0.44	11.09	2.97
0.62	8.03	3.36	0.31	3.96	1.98
IL6 (Fold change)
sictrl			siTGR5
100μM GCDCA	SFTSV	100μM GCDCA+SFTSV	100μM GCDCA	SFTSV	100μM GCDCA+SFTSV
0.03	105.53	13.61	1.65	87.52	17.22
0.03	181.12	59.53	0.77	36.01	3.54
0.16	140.12	30.51	3.03	39.85	7.68
1.08	251.2	62.65	0.02	23.37	3.13
0.39	154.03	22.75	0.02	59.29	3.43
0.39	179.24	25.39	0.02	31.5	5.51

## Sheet: FigS10I
HAL Content(ng/ml)
SFTSV	SFTSV+TCDCA
0	293.526

## Sheet: FigS10J
AKK load
ABX	A. muciniphila
3.00348	7.55992
3.14955	7.72973
3.49703	6.0786
