# Supplementary material
Source: publisher figshare collection journal article supplement (https://springernature.figshare.com/articles/dataset/_/21334422)
Supplement: Supplementary file 5 [file 1 › Source_Data_Figure_1.xlsx]

## Sheet: Fig 1A
	HC	Non-SF	SF-S	SF-D
Bacteroides	0.131102	0.138984	0.151429	0.144761
Blautia	0.0471006	0.0584504	0.0549398	0.0449069
Enterococcus	0.00144318	0.0299063	0.0426465	0.0387644
Faecalibacterium	0.0498294	0.0517074	0.036482	0.0357727
Parabacteroides	0.016148	0.02126	0.0318756	0.0479231
Lactobacillus	0.0090295	0.0256885	0.0296602	0.010435
Streptococcus	0.0162634	0.0289755	0.0259996	0.0463752
Akkermansia	0.00220807	0.00242006	0.0249499	0.00216571
Subdoligranulum	0.027946	0.0331434	0.0232535	0.0149145
Lachnoclostridium	0.00685871	0.0147387	0.0208252	0.0108768
Alistipes	0.0144967	0.0156755	0.0198439	0.0133438
Klebsiella	0.0157271	0.0159263	0.0188333	0.00612136
Bifidobacterium	0.0142851	0.0169946	0.0128879	0.00836323

## Sheet: Fig1B
HC	Non-SF	SF-S	SF-D
0.0008	0.0050956	0.22535	0.00333615
0	0.0006398	0.0021251	0.000708361
0.008386	0.0006398	0.0015081	0.000251354
0.001714	0.0020337	0.004273	0.00504993
0.000708	0.0004113	0.0839979	9.14e-05
0.000526	0.0016909	0.0015081	0.000114252
0.000114	0.0007769	0.0040217	0.00212508
0.000297	0.0101913	0.0007084	0.00132532
0.000434	2.29e-05	0.0363321	0.000822613
0.000366	0.0002285	0.0093686	0.00338185
0.006352	0.0004799	0.003199	0.00109682
0.002673	0.0003428	0.0197199	4.57e-05
0.002011	0.0017366	0.0056669	0.000388456
0.005553	0.0002742	0.0081576	0.00121107
0.000571	0.0007541	0.0007312	0.00377031
0.000434	0.0004799	0.0012339	4.57e-05
0.000297	0.0001143	0.0006398	0.00276489
0.000274	0.0003428	0.0603706	0.00061696
0.010443	0.0044101	0.0014853	0.00532413
	0.0002514	0.0122706	0.00596394
	9.14e-05	9.14e-05	0.000297055
	0.0007312	0.0010054	0.000137102
	0.0002057	0.0019194	0.0186916
	0.0133218	0.0007998	4.57e-05
	0.0025592	9.14e-05	4.57e-05
	0.0023079	4.57e-05	0.000776912
	0.0001828	0.0451751	4.57e-05
	0.0007312	0.0350296
	6.86e-05	0.0059182
	0.0069237	0.0019423
	2.29e-05	0.0064895
	4.57e-05	0.0002285
	6.86e-05	0.0003656
	9.14e-05	0.0011882
	0.0002285	0.0002514
	0	0.0703105
	0	0.0027192
	0.0001828	0.0006855
	2.29e-05	0.0005941
	4.57e-05	0.0052556
	0.0012339	0.0010054
	0.0122706	0.0011197
	4.57e-05	0.0923383
	4.57e-05	0.0002742
	0.0023993	0.0012111
	4.57e-05	0.0001371
	0.0022165	0.0005484
	0.0001828	0.025958
	0.0001371	0.0005256
	0.0007312	0.0023993
	0.0003199	2.29e-05
	0.0002057	0.000457
	0.0005484	4.57e-05
	0.0026963	4.57e-05
	0.0025135	0
	0.0020565	9.14e-05
	0.0016681	0.0124534
	0.001828	0.0100313
	0.006718	0.0020794
	0.0010968	0.0013482
	0.0001828	0.000457
	0.0003656	0.0123163
	6.86e-05	4.57e-05
	0.0004799	0.0002971
	0.0013939	6.86e-05
	0.0008912	4.57e-05
	0.0481685	0.0003199
	0.0026963	0.0009369
	0.0004799	0.000914
	0.000457	0.0006627
	0.0002514	0.0001371
	0.0005256	0.000617
	0.0358294	0.0003428
	0.0003656	0.0014624
	0.0002514	0.001531
	0.0003885	0.0163837
	0.0002285	0.0007541
	0.0002514	0.0011882
	0.0002514	0.0266207
	0	0
	0	0.0027649
	0.0004342	0.0001828
	2.29e-05	0.0040217
	0	0.0003885
	0.0002285	0.00962
	2.29e-05	0.001988
	0.000457	0.0003428
	0.0004799	0.0014853
	0.0087745	0.0006627
	0.0002742	0.0036104
	0	0.0029477
	0.0008683	0.360807
	0.0019651	0.441766
	6.86e-05	0.012065
	4.57e-05	0.0056669
	0.002742	0.0001143
	0.0015995	0.0005484
	0.0074264	0.359093
	0.0003885	0.0033819
	0.0010283	0.0077691
	0.0003428	0.0858716
	0.005644	0.0405137
	0.0064209	0.0048214
	0.0089802	0.12097
	0.003976	0.0054155
	0.0008683	0.118136
	0.0045929	0.0127505
	0.0036104	0.0144414
	0.0025821	0.0042502
	0.0034504	0.0085917
	0.0003885	6.86e-05
	0.0276946	0.0002971
	0.0018509	0.0372232
	0.0034276	0.0005484
	0.0007084	0.0007312
	0.0236273	0.0004113
	0.0029705	0.0039531
	0.0002057	0.0001143
	0.0016909	0.003199
	0.0005713	0.0005256
	0.0002057	6.86e-05
	0.0001371	0.0049128
	0.0014853	0.0002742
	0.0091401	0.0005027
	9.14e-05	0.0324247
	0.0013025	6.86e-05
	0.0009826	0.0523273
	4.57e-05	0.0003656
	0.00016	0.0003885
	0	6.86e-05
	0.0001371	0.0007084
	0.00016	0.0001371
	0.0033362	0.0007541
	0.0005941	0.0003885
	0.0074949	0.665951
	0.0005256	0.0015081
	0.0010283	0.002742
	0.001531	0.0170007
	0.0053241	0.0022622
	0.0007769	0.0010511
	0.0001828	0.025341
	0.0014853	0.0704248
	0	0.0011425
	0.0002285	0.250006
	0.0012111	0.0068551
	0.0021479	0.0076549
	0.007335	0.0007769
	0.0071979	0.0007084
	0.0016224	0.0002285
	0.0029248	0.0012796
	0.0004799	0.0017366
	6.86e-05	9.14e-05
	0.0001828	0.0101456
	0.0005256	0.0112195
	4.57e-05	0.0676142
	0.0001143	0.0034733
	0.0001143	0.194708
	0.0001828	0.0011197
	0.0025364	0.144163
	0.001988	0.0090487
	0	0.002742
	0.000457	0.0012111
	0.0018966	0.0440098
	0.0019194	0.0003199
	0.0007312	0.0081576
	0.0007312	0.0009369
	0.0018737	0.0008226
	0.0026963	2.29e-05
	0.0270091	2.29e-05
	0.0002971	0.00016
	0.000617	0.0389827
	0.0003885	0.0033133
	0.0002285	0.0115394
	2.29e-05	0.0001828
	0.0001143	0.0015995
	0.0002514	0.0029248
		0.0017138
		0.0001371
		0.0757718
		0.0019194
		0.0005484
		0.0022622
		0.0007998
		0.0022393
		0.0022165
		0.0002057
		0.0002285
		0.0430729
		0.059251
		0.0011882
		0.0008226
		0.0471174
		0.0001143
		0.0025821
		0.0599136
		0.0002285
		0.0013482
		0.0791765
		0.0004113
		0.0003428
		0.000457
		0.0002971
		9.14e-05
		9.14e-05
		0.0008912
		0.0002971
		0.0004342
		0.0121792
		6.86e-05
		2.29e-05
		0.0002971
		0.0089573
		0.0016224
		0.0025135
		0.254964
		0.269589
		0.0003428
		0.0003199
		0.0025592
		0.0037932
		0.0005941
		0.0488084
		0.00016
		0.0566917
		0.0023079
		0.0014167
		0.0006855
		0.000457
		0.0008455
		0.247858
		0.0001828
		0.17725
		0.0620616

## Sheet: Fig1C
Non-SF				SF-S
≤5	6-10	>10		≤5	6-10	>10
0.00064	0.001737	6.86e-05		0.00212508	0.0839979	0.00347325
0.00064	0.000274	4.57e-05		0.00150812	0.0015081	0.194708
0.002034	0.000754	0.000183		0.00427302	0.0056669	0.000822613
0.000411	0.00048	0.000731		0.00402166	0.0081576	2.28504e-05
0.001691	0.000114	0.000297		0.00070836	0.0007312	0.000183
0.000777	0.000343	0.000251		0.0363321	0.0012339	0.000137102
0.010191	9.14e-05			0.00936864	0.0603706	0.0757718
2.29e-05	0.000731			0.00319905	0.0019194	0.000114252
0.000229	2.29e-05			0.0197	0.0007998	0.00134817
0.00048	4.57e-05			0.00063981	0.0451751	0.0791765
0.000343	0			0.00148527	0.0350296	0.000411306
0.00441	0.000183			0.0122706	0.0059182	0.000342755
0.000251	2.29e-05			9.1401e-05	0.0064895	0.000297
0.000731	4.57e-05			0.00100542	0.0011882	0.000891164
0.000206	4.57e-05			9.1401e-05	0.0027192	6.85511e-05
0.013322	4.57e-05			4.5701e-05	0.0005941	0.00895734
0.002559	0.002216			0.00194228	0.0011197	0.00162
0.002308	0.000183			0.0002285	0.0001371	0.00251354
0.000183	0.00032			0.00036561	0.0023993	0.269589
6.86e-05	0.000548			0.00025135	0.000457	0.00255924
0.00692	0.002514			0.0703	0	0.0566917
6.86e-05	0.00206			0.00068551	9.14e-05	0.000845463
9.14e-05	0.006718			0.00525558	0.0020794	0.22535
0.000229	0.001097			0.00100542	0.0013482	0.250006
0	6.86e-05			0.0923383	0.000457	0.0620616
4.57e-05	0.00046			0.0002742	4.57e-05	0.442
0.001234	0.000526			0.00121107	0.0002971
0.012271	0.000229			0.00054841	4.57e-05
0.002399	0.000434			0.025958	0.0009369
0.000137	2.29e-05			0.000526	0.000914
0.000731	0			2.285e-05	0.0001371
0.000206	0.00048			4.57e-05	0.000617
0.002696	0.008775			4.57e-05	0.0003428
0.001668	0.000274			0.0125	0.0014624
0.001828	0			0.01	0.001531
0.000183	0.000868			0.0123163	0.0007541
0.000366	0.001965			6.8551e-05	0.0011882
0.00048	6.86e-05			0.0003199	0.0266207
0.001394	4.57e-05			0.00066266	0
0.000891	0.000343			0.0164	0.0027649
0.048169	0.006421			0.000183	0.001988
0.002696	0.003976			0.00402166	0.0003428
0.00048	0.002582			0.00038846	0.0014853
0.000251	0.000708			0.00962	0.0036104
0.035829	0.023627			0.000663	0.360807
0.000366	0.000206			0.0029477	0.359093
0.000251	0.001691			0.012065	0.0033819
0.000388	9.14e-05			0.00566689	0.0048214
0.000251	0.000983			0.00011425	0.12097
0.000251	0			0.00054841	0.118136
0	0.000137			0.00776912	0.0042502
0	0.003336			0.0858716	0.00859
0.000229	0.007495			0.0405137	6.855e-05
2.29e-05	0.000526			0.00541553	0.000548
0.000457	0.005324			0.0127505	0.000731
0.002742	0.007198			0.0144414	0.003199
0.0016	0.001622			0.00029705	0.0005256
0.007426	0.002925			0.0372232	6.86e-05
0.000388	0.00048			0.00041131	0.0049128
0.001028	0.000183			0.00395311	0.0005027
0.005644	0.000526			0.00011425	6.855e-05
0.00898	0.000114			0.0002742	0.0523273
0.000868	0.000114			0.0324246	0.0003885
0.004593	0.002536			0.000366	0.0007541
0.00361	0.001988			6.8551e-05	0.000388
0.00345	0			0.00070836	0.665951
0.000388	0.000457			0.0001371	0.0170007
0.027695	0.001897			0.00150812	0.00105
0.001851	0.001919			0.00274204	0.00114
0.003428	0.000731			0.00226218	0.0068551
0.002971	0.001874			0.025341	0.0007769
0.000571	0.002696			0.0704248	0.0002285
0.000206	0.027009			0.00765487	0.0012796
0.000137	0.000617			0.00070836	0.0017366
0.001485	0.000388				9.14e-05
0.00914	0.000229				0.0101
0.001302	2.29e-05				0.0112195
4.57e-05	0.000114				0.0676
0.00016					0.0011197
0.00016					0.144163
0.000594					0.0090487
0.001028					0.002742
0.001531					0.0012111
0.000777					0.0440098
0.000183					0.0003199
0.001485					0.0081576
0					0.0009369
0.000229					2.285e-05
0.001211					0.00016
0.002148					0.0389827
0.007335					0.0033133
					0.0115394
					0.0015995
					0.0029248
					0.0017138
					0.0019194
					0.0005484
					0.0022622
					0.0007998
					0.0022393
					0.0022165
					0.0002057
					0.0002285
					0.0430729
					0.059251
					0.0011882
					0.0008226
					0.0471174
					0.0025821
					0.0599136
					0.0002285
					0.000457
					9.14e-05
					9.14e-05
					0.0002971
					0.0004342
					0.0121792
					2.285e-05
					0.0002971
					0.254964
					0.0003428
					0.0003199
					0.00379
					0.000594
					0.0488084
					0.00016
					0.0023079
					0.0014167
					0.0006855
					0.000457
					0.248
					0.0001828
					0.17725

## Sheet: Fig 1D
SF-S	SF-D		Akkermansia relative abundance (log10-transformed)	Viral load (log10-transformed copies/ml)		<6	6-7	≥7
3.3	6.17085		-0.647142	6.17085		0.002125	0.22535	0.004273
5.81022	7.06077		-2.67262	5.81022		0.001508	0.0015081	0.0839979
6.84024	8.14009		-2.82156	6.84024		0.036332	0.0040217	0.0056669
7.16455	8.7005		-2.36927	7.16455		0.009369	0.0007084	0.0122706
7.31504	8.50332		-1.07573	7.31504		0.003199	0.0081576	0.0019194
5.51445	5.37694		-2.82156	5.51445		0.01972	0.0007312	9.14e-05
6.64306	7.0011		-2.39559	6.64306		0.060371	0.0012339	0.0059182
6.08265	7.3799		-3.14975	6.08265		0.001485	0.0006398	0.0011882
5.22646	6.74165		-1.43971	5.22646		0.001005	9.14e-05	0.0027192
5.55077	5.68949		-2.02832	5.55077		4.57e-05	0.0007998	0.0005941
5.60785	5.3055		-2.49498	5.60785		0.045175	0.0350296	0.0023993
5.7713	6.2499		-1.7051	5.77131		0.000251	0.0019423	0.0124534
7.54335	5.74916		-2.24666	7.54335		0.000686	0.0064895	4.57e-05
6.72349	5.53901		-2.08844	6.72349		0.000548	0.0002285	0.144163
6.30837	4.86184		-3.13596	6.30837		0.025958	0.0003656	0.0003199
6.33172	5.46377		-2.90871	6.33172		0.000457	0.0703105	0.0009369
6.31875	7.42141		-3.19395	6.31875		4.57e-05	0.0052556	0.0008226
5.97627	9.15454		-1.21917	5.97627		0	0.0010054	0.0029248
3.3	7.96885		-2.82819	3.3		0.010031	0.0011197	0.00016
7.29169	7.27612		-1.91113	7.29169		0.000457	0.0923383	0.0033362
6.29799	6.56263		-4.03905	6.29799		0.012316	0.0002742	0.0007084
5.27057	6.93624		-2.99765	5.27057		0.000297	0.0012111	0.0002514
7.25277	6.28242		-2.71683	7.25277		6.86e-05	0.0001371	0.0050499
6.59636	7.5731		-3.09704	6.59636		4.57e-05	0.0005256	0.0001143
8.12452	5.93597		-4.03905	8.12452		0.00032	2.29e-05	0.0013253
5.28613	7.24879		-4.34008	5.28613		0.000937	4.57e-05	0.0027649
5.9607	6.42512		-1.3451	5.9607		0.000914	9.14e-05	0.000617
6.45885			-1.45556	6.45885		0.000663	0.0020794	0.0053241
7.22163			-2.22781	7.22163		0.000617	0.0013482	0.0059639
6.44588			-2.71169	6.44588		0.000343	0.0001371	0.0007769
6.78576			-2.18779	6.78576		0.001462	0
6.14751			-3.64111	6.14751		0.001531	0.0036104
6.70273			-3.43699	6.70273		0.016384	0.0005484
8.0882			-2.9251	8.0882		0.000754	6.86e-05
5.54039			-3.59971	5.54039		0.001188	0.0005484
6.765			-1.15298	6.765		0.026621	0.0011425
7.20607			-2.56556	7.20607		0.002765	0.0034733
5.94254			-3.16399	5.94254		0.000183	0.194708
7.17753			-3.22613	7.17753		0.004022	0.0090487
6.05411			-2.27938	6.05411		0.000388	0.002742
6.09043			-2.99765	6.09043		0.00962	0.0440098
6.32393			-2.95091	6.32393		0.001988	0.0081576
6.29799			-1.03462	6.29799		0.000343	2.29e-05
6.15529			-3.56193	6.15529		0.001485	2.29e-05
6.6716			-2.91683	6.6716		0.000663	0.0389827
6.79613			-3.86296	6.79613		0.002948	0.0001828
3.3			-3.2609	3.3		0.360807	0.0015995
3.3			-1.58573	3.3		0.441766	0.0757718
6.70273			-3.27938	6.70273		0.012065	0.0019194
7.01667			-2.61992	7.01667		0.005667	0.0022165
6.96218			-4.64111	6.96218		0.000114	0.0002285
5.02149			-3.34008	5.02149		0.359093	0.0791765
6.11378			-4.34008	6.11378		0.003382	6.86e-05
5.34581			-4.34008	5.34581		0.007769	0.0016224
5.26278			#NUM!	5.26278		0.085872	0.254964
6.47442			-4.03905	6.47442		0.040514	0.269589
8.12452			-1.90471	8.12452		0.004821	0.0003428
3.3			-1.99864	3.3		0.12097	0.0037932
6.36285			-2.68207	6.36285		0.005416	0.0023079
6.27983			-2.87026	6.27983		0.118136	0.0008226
5.2524			-3.34008	5.2524		0.01275	4.57e-05
5.33802			-1.90952	5.33802		0.014441	0.0002971
7.53816			-4.34008	7.53816		0.00425	0.0001371
4.48045			-3.52716	4.48045		0.008592	0.0186916
4.50121			-4.16399	4.50121		0.000297	4.57e-05
4.09906			-4.34008	4.09906		0.037223
5.51566			-3.49498	5.51566		0.000731
3.3			-3.02832	3.3		0.000411
5.13427			-3.03905	5.13427		0.003953
5.87629			-3.17871	5.87629		0.000114
6.74805			-3.86296	6.74805		0.003199
5.75954			-3.20974	5.75954		0.000526
5.46636			-3.46502	5.46636		6.86e-05
5.1628			-2.83493	5.16281		0.004913
5.57274			-2.81503	5.57274		0.000274
4.99157			-1.78559	4.99157		0.000503
5.27437			-3.12259	5.27437		0.032425
4.21322			-2.9251	4.21322		6.86e-05
4.72174			-1.57478	4.72174		0.052327
6.89853			#NUM!	6.89853		0.000366
5.28475			-2.55832	5.28475		0.000388
4.55569			-3.73802	4.55569		6.86e-05
4.93189			-2.39559	4.93189		0.000708
4.67504			-3.41066	4.67504		0.000137
3.562			-2.01682	3.562		0.000754
4.51937			-2.70159	4.51937		0.000388
4.93449			-3.46502	4.93449		0.665951
5.03048			-2.82819	5.03049		0.001508
4.66725			-3.17871	4.66725		0.002742
6.30698			-2.44245	6.30698		0.017001
4.82292			-2.53052	4.82293		0.002262
3.305			-0.442725	3.305		0.001051
5.26659			-0.354808	5.26659		0.025341
4.52196			-1.91847	4.52196		0.070425
4.51937			-2.24666	4.51937		0.250006
5.41188			-3.94214	5.41188		0.006855
6.36665			-3.2609	6.36666		0.007655
3.728			-0.444793	3.728		0.000777
5.13427			-2.47085	5.13427		0.000708
3.3			-2.10963	3.3		0.000229
3.98749			-1.06615	3.98749		0.00128
4.21581			-1.3924	4.21581		0.001737
4.90336			-2.31682	4.90335		9.14e-05
3.3			-0.917323	3.3		0.010146
3.3			-2.26636	3.3		0.01122
5.21988			-0.927617	5.21988		0.067614
5.80624			-1.89447	5.80624		0.00112
3.3			-1.84039	3.3		0.001211
4.91373			-2.37159	4.91373		0.00016
4.88519			-2.06592	4.88519		0.003313
6.44968			-4.16399	6.44968		0.011539
4.80217			-3.52716	4.80217		0.001714
3.34146			-1.42919	3.34146		0.000137
6.36665			-3.2609	6.36666		0.000548
4.27808			-3.13596	4.27808		0.002262
4.26251			-3.38583	4.26251		0.0008
3.3			-2.40306	3.3		0.002239
3.7514			-3.94214	3.75139		0.000206
5.15762			-2.49498	5.15762		0.000229
5.8244			-3.27938	5.8244		0.043073
5.72841			-4.16399	5.72841		0.059251
3.60351			-2.30867	3.60351		0.001188
5.3522			-3.56193	5.3522		0.000823
4.75028			-3.29868	4.75028		0.047117
3.70469			-1.48912	3.70469		0.000114
5.3522			-4.16399	5.3522		0.002582
5.31588			-1.28127	5.31588		0.059914
4.73731			-3.43699	4.73731		0.001348
4.89298			-3.41066	4.89298		0.000411
4.54531			-4.16399	4.54531		0.000343
3.3			-3.14975	3.3		0.000457
4.34035			-3.86296	4.34035		0.000297
4.44672			-3.12259	4.44672		9.14e-05
5.14464			-3.41066	5.14464		9.14e-05
5.4015			-0.176558	5.4015		0.000891
5.16799			-2.82156	5.16799		0.000297
4.46748			-2.56193	4.46748		0.000434
4.23916			-1.76953	4.23916		0.012179
4.2677			-2.64547	4.2677		2.29e-05
4.47267			-2.97835	4.47267		0.000297
4.96562			-1.59618	4.96562		0.008957
4.91892			-1.15227	4.91892		0.002514
6.80253			-2.94214	6.80253		0.00032
4.4337			-0.60205	4.4337		0.002559
4.67504			-2.16399	4.67504		0.000594
4.51418			-2.11606	4.51418		0.048808
3.70988			-3.10963	3.70988		0.056692
4.58942			-3.14975	4.58942		0.001417
4.63872			-3.64111	4.63872		0.000686
5.32626			-2.89292	5.32626		0.000457
5.84256			-2.76029	5.84257		0.000845
4.71915			-4.03905	4.71914		0.247858
5.02789			-1.99372	5.02789		0.000183
5.51566			-1.95003	5.51566		0.17725
3.94598			-1.16996	3.94598		0.062062
6.05151			-2.45926	6.05151		9.14e-05
6.604			-0.710617	6.604		0.002125
5.28354			-2.95091	5.28354		0.003382
7.70421			-0.841147	7.70421		0.001097
6.1034			-2.04341	6.1034		0.000388
6.36026			-2.56193	6.36026		0.001211
5.10711			-2.91683	5.10711		0.00377
6.37064			-1.35645	6.37064		4.57e-05
7.69383			-3.49498	7.69383		4.57e-05
6.66381			-2.08844	6.66381
7.1412			-3.02832	7.1412
7.83913			-3.0848	7.83913
6.41993			-4.64111	6.41993
6.40436			-4.64111	6.40436
5.75574			-3.79601	5.75574
6.73127			-1.40913	6.73127
4.94625			-2.47974	4.94625
5.72201			-1.93782	5.72201
6.91548			-3.73802	6.91548
6.79354			-2.79601	6.79354
7.82615			-2.5339	7.82615
4.64131			-2.76605	4.64131
5.98007			-3.86296	5.98007
6.33033			-1.12049	6.33033
6.52233			-2.71683	6.52233
5.75954			-3.2609	5.75954
4.11981			-2.64547	4.11981
3.65021			-3.09704	3.65021
4.37148			-2.64988	4.37148
6.47822			-2.65434	6.47822
5.65836			-3.68686	5.65836
5.36518			-3.64111	5.36518
5.78289			-1.3658	5.78289
4.68801			-1.2273	4.68801
5.93597			-2.9251	5.93597
3.94079			-3.0848	3.94079
5.00195			-1.32682	5.00195
4.15614			-3.94214	4.15614
4.00825			-2.58803	4.00825
5.26659			-1.22247	5.26659
6.88815			-3.64111	6.88815
5.4482			-2.87026	5.4482
6.65205			-1.1014	6.65205
5.55457			-3.38583	5.55458
5.66355			-3.46502	5.66354
4.46488			-3.34008	4.46488
5.18097			-3.52716	5.18097
5.05384			-4.03905	5.05384
4.94487			-4.03905	4.94487
4.96043			-3.05004	4.96043
5.27956			-3.52716	5.27956
5.90224			-3.36235	5.90224
5.11351			-1.91438	5.11351
6.02159			-4.16399	6.02159
5.95413			-4.64111	5.95413
5.5442			-3.52716	5.5442
5.98007			-2.04782	5.98007
6.13315			-2.78985	6.13315
5.34442			-2.59971	5.34442
6.21877			-0.593521	6.21877
6.57422			-0.569299	6.57422
6.22136			-3.46502	6.22136
4.22878			-3.49498	4.22878
5.86851			-2.59189	5.86851
6.07866			-2.421	6.07867
5.76473			-3.22613	5.76473
5.45598			-1.31151	5.45598
7.1943			-3.79601	7.1943
5.27437			-1.24648	5.27437
6.02418			-2.63679	6.02418
5.62982			-2.84872	5.62982
4.02122			-3.16399	4.02122
4.53753			-3.34008	4.53753
4.22878			-3.07291	4.22878
5.0019			-0.605797	5.0019
5.74657			-3.73802	5.74657
3.3			-0.751413	3.3
3.3			-1.20718	3.3
			-2.47675	7.06077
			-3.14975	8.14009
			-3.59971	8.7005
			-2.29671	8.50332
			-4.03905	5.37694
			-3.94214	7.0011
			-2.67262	3.3
			-2.87768	7.3799
			-3.0848	6.74165
			-2.47085	5.68949
			-2.95987	5.3055
			-4.34008	6.2499
			-3.41066	5.74916
			-2.91683	5.53901
			-2.42362	4.86184
			-4.34008	5.46377
			-2.55832	7.42141
			-3.20974	9.15454
			-2.27375	7.96885
			-2.22447	7.27612
			-3.52716	6.56263
			-3.86296	6.93624
			-1.72835	6.28242
			#NUM!	7.5731
			-4.34008	5.93597
			-3.10963	7.24879
			-4.34008	6.42512

## Sheet: Fig 1E
HC	Non-SF	SF-S	SF-D		Akkermansia relative abundance (log10-transformed)	IL1B (log10 pg/ml)
2.34	0.999	6.111	63.3045		-0.647142	0.600646
1.863	0.999	8.793	28.6965		-2.67262	0.944137
2.025	1.422	3.618	15.9495		-2.82156
1.71	1.863	8.856	19.215		-2.36927	0.947238
1.566	1.278	4.437	12.6		-1.07573	0.647089
0.864	3.69	5.292	34.9335		-2.82156	0.72362
1.134	4.896	4.752	30.5235		-2.39559	0.676876
1.422	6.723	12.735	22.575		-3.14975	1.105
1.944	2.673	3.987	53.1615		-1.43971	0.592732
2.34	3.402	4.293	15.9495		-2.02832
	1.566	3.915	13.65		-2.49498	0.786112
	0.864	4.896	11.865		-1.7051	0.689841
	2.817	6.57	10.395		-2.24666	0.817565
	1.863	7.335	14.721		-2.08844	0.689841
	2.115	3.987	14.9205		-3.13596
	2.34	6.111	19.3725		-2.90871	0.786112
	1.863	2.664	10.6155		-3.19395	1.0807
	2.178	8.253	5.67		-1.21917	0.67108
	5.031	8.865	20.013		-2.82819	0.947679
	0.882	12.042	7.4025		-1.91113	0.73456
	0.945	6.453	5.46		-4.03905
	6.08	4.896			-2.99765	0.689841
	1.134	5.652			-2.71683	0.8654
	1.422	4.356			-3.09704	0.809762
	1.215	7.407			-4.03905	0.869642
		5.805			-4.34008	1.10684
		5.427			-1.3451	0.425534
		15.228			-1.45556	0.632761
		11.349			-2.22781	1.05496
		3.105			-2.71169	0.804889
		11.214			-2.18779	1.04976
		4.356			-3.64111	1.09538
		10.242			-3.43699	1.01038
		7.479			-2.9251	0.873844
		6.381			-3.59971	1.18264
		5.877			-1.15298	0.769156
		1.872			-2.56556
		6.111			-3.16399	0.786112
		8.028			-3.22613	0.904607
		5.832			-2.27938	0.765818
		5.022			-2.99765	0.700877
		3.303			-2.95091
		12.456			-1.03462	0.752202
		5.832			-3.56193	0.765818
		9.279			-2.91683	0.967501
		8.721			-3.86296	0.940566
		8.442			-3.2609	0.926445
		5.832			-1.58573	0.765818
		5.04			-3.27938	0.702431
		6.039			-2.61992	0.780965
		5.652			-4.64111
		5.562			-3.34008	0.745231
		7.137			-4.34008
		4.689			-4.34008
		3.951			#NUM!	0.352183
		9.135			-4.03905	0.960709
		8.028			-1.90471	0.904607
		5.427			-1.99864
		8.64			-2.68207	0.936514
		11.772			-2.87026	1.07085
		7.794			-3.34008	0.89176
		3.987			-1.90952	0.878522
		4.617			-4.34008
		4.752			-3.52716	0.676876
		7.488			-4.16399
		4.437			-4.34008	1.00732
		9.414			-3.49498	0.973774
		2.25			-3.02832	0.853516
		16.326			-3.03905	1.21288
		6.111			-3.17871	0.786112
		7.758			-3.86296	0.88975
		3.033			-3.20974	0.916612
		7.407			-3.46502	0.869642
		6.723			-2.83493	0.827563
		21.528			-2.81503	0.853516
					-1.78559
		9.936			-3.12259	0.997212
		3.321			-2.9251	0.740284
		5.499			-1.57478	0.521269
		5.202			#NUM!	0.492062
		6.075			-2.55832	0.783546
		10.944			-3.73802	1.03918
		4.437			-2.39559	0.647089
		5.904			-3.41066	0.771146
		9.972			-2.01682	0.998782
		15.417			-2.70159	1.188
		12.789			-3.46502	0.763802
		11.385			-2.82819	1.05633
		2.988			-3.17871
		10.782			-2.44245	1.0327
		5.121			-2.53052	0.709355
		10.17			-0.442725	0.451172
		2.826			-0.354808	0.272306
		3.825			-1.91847	0.647089
		5.031			-2.24666	0.701654
		4.437			-3.94214
		10.674			-3.2609	1.02833
		7.137			-0.444793	0.66436
		4.509			-2.47085	0.65408
		7.182			-2.10963	0.856245
		7.56			-1.06615	0.600646
		4.437			-1.3924	0.647089
		8.73			-2.31682	0.941014
		4.68			-0.917323	0.670246
		9.792			-2.26636	0.990871
		2.736			-0.927617	0.437116
		5.958			-1.89447	0.7751
		6.255			-1.84039	0.796227
					-2.37159
					-2.06592	0.639088
					-4.16399	1.333
					-3.52716
					-1.42919	0.518909
					-3.2609
					-3.13596
					-3.38583
					-2.40306
					-3.94214
					-2.49498
					-3.27938
					-4.16399
					-2.30867
					-3.56193
					-3.29868
					-1.48912
					-4.16399
					-1.28127	0.639088
					-3.43699
					-3.41066
					-4.16399
					-3.14975
					-3.86296
					-3.12259
					-3.41066
					-0.176558	0.582631
					-2.82156
					-2.56193
					-1.76953	0.558469
					-2.64547
					-2.97835
					-1.59618	0.600646
					-1.15227	0.71617
					-2.94214	0.874366
					-0.60205	0.647089
					-2.16399
					-2.11606
					-3.10963
					-3.14975
					-3.64111
					-2.89292
					-2.76029
					-4.03905
					-1.99372
					-1.95003
					-1.16996	0.596707
					-2.45926
					-0.710617
					-2.95091
					-0.841147	0.475381
					-2.04341
					-2.56193
					-2.91683
					-1.35645	0.481872
					-3.49498
					-2.08844
					-3.02832
					-3.0848
					-4.64111
					-4.64111
					-3.79601
					-1.40913	0.73456
					-2.47974
					-1.93782
					-3.73802
					-2.79601
					-2.5339
					-2.76605
					-3.86296
					-1.12049
					-2.71683
					-3.2609
					-2.64547
					-3.09704
					-2.64988
					-2.65434
					-3.68686
					-3.64111
					-1.3658
					-1.2273
					-2.9251
					-3.0848
					-1.32682
					-3.94214
					-2.58803
					-1.22247
					-3.64111
					-2.87026
					-1.1014
					-3.38583
					-3.46502
					-3.34008
					-3.52716
					-4.03905
					-4.03905
					-3.05004
					-3.52716
					-3.36235
					-1.91438
					-4.16399
					-4.64111
					-3.52716
					-2.04782
					-2.78985
					-2.59971
					-0.593521
					-0.569299
					-3.46502
					-3.49498
					-2.59189
					-2.421
					-3.22613
					-1.31151
					-3.79601
					-1.24648
					-2.63679
					-2.84872
					-3.16399
					-3.34008
					-3.07291
					-0.605797
					-3.73802
					-0.751413
					-1.20718
					-2.47675	1.28719
					-3.14975	1.20275
					-3.59971	1.20275
					-2.29671	0.753583
					-4.03905
					-3.94214	1.54324
					-2.67262	1.07427
					-2.87768	1.35363
					-3.0848	1.10037
					-2.47085
					-2.95987	1.13513
					-4.34008	1.48463
					-3.41066	1.30131
					-2.91683	1.16794
					-2.42362	1.17378
					-4.34008	1.80143
					-2.55832	1.02594
					-3.20974	1.28364
					-2.27375	1.01682
					-2.22447	0.869378
					-3.52716	1.45783
					-3.86296
					-1.72835	0.737193
					#NUM!
					-4.34008	1.7256
					-3.10963
					-4.34008

## Sheet: Fig 1F
HC	Non-SF	SF-S	SF-D		Akkermansia relative abundance (log10-transformed)	IL6 (log10 pg/ml)
0.954	0.954	13.014	138.069		-0.647142	-0.0204516
0.954	0.954	8.622	33.696		-2.67262	0.935608
0.954	0.954	3.771	30.663		-2.82156
0.954	0.954	9.576	44.298		-2.36927	0.981184
0.954	0.954	7.488	29.808		-1.07573	0.874366
0.954	0.954	0.954	102.447		-2.82156	0.935608
0.954	3.051	5.787	88.515		-2.39559	0.762453
1.674	4.455	21.726	44.253		-3.14975	1.33698
1.008	2.844	7.515	116.649		-1.43971	0.875929
0.954	0.954	8.622	36.414		-2.02832
	7.983	9.81	27.108		-2.49498	0.991669
	0.954	7.515	63.792		-1.7051	0.875929
	3.978	4.554	49.779		-2.24666	0.658393
	2.367	17.523	64.413		-2.08844	0.639984
	5.211	3.978	17.523		-3.13596
	0.954	5.778	31.212		-2.90871	0.761778
	4.167	10.575	7.515		-3.19395	1.42465
	1.818	10.287	6.264		-1.21917	-0.0204516
	0.954	17.523	64.359		-2.82819	1.24361
	0.954	26.586	7.515		-1.91113	1.02428
	0.954	14.202	6.633		-4.03905
	6.849	6.849			-2.99765	0.835627
	3.978	6.264			-2.71683	0.796852
	2.88	4.167			-3.09704	0.619824
	1.251	0.954			-4.03905	1.11441
		4.365			-4.34008	1.24361
		2.367			-1.3451	-0.0204516
		24.399			-1.45556	-0.0204516
		22.365			-2.22781	1.34957
		0.954			-2.71169	1.38737
		23.193			-2.18779	1.36536
		5.364			-3.64111	1.15235
		20.925			-3.43699	1.32067
		1.656			-2.9251	1.15235
		3.978			-3.59971	0.599665
		8.496			-1.15298	0.929215
		0.954			-2.56556
		2.367			-3.16399	0.374198
		4.761			-3.22613	0.677698
		0.954			-2.27938	0.731669
		5.094			-2.99765	0.707059
		11.943			-2.95091
		12.708			-1.03462	1.10408
		0.954			-3.56193	1.01229
		4.869			-2.91683	0.68744
		9.216			-3.86296	0.964542
		5.211			-3.2609	0.716921
		3.555			-1.58573	-0.0204516
		0.954			-3.27938	0.745933
		8.496			-2.61992	0.929215
		5.571			-4.64111
		7.236			-3.34008	0.859499
		0.954			-4.34008
		0.954			-4.34008
		5.391			#NUM!	-0.0204516
		5.391			-4.03905	1.42141
		2.277			-1.90471	0.357363
		3.555			-1.99864
		2.007			-2.68207	0.302547
		26.388			-2.87026	0.731669
		10.053			-3.34008	1.0023
		3.15			-1.90952	0.498311
		4.194			-4.34008
		0.954			-3.52716	0.55084
		2.367			-4.16399
		1.026			-4.34008	0.986055
		12.519			-3.49498	1.09757
		0.954			-3.02832	0.563837
		45.18			-3.03905	1.65495
		2.943			-3.17871	1.07711
		3.141			-3.86296	1.49231
		5.562			-3.20974	1.15235
		3.6			-3.46502	0.556303
		6.606			-2.83493	0.819939
		71.316			-2.81503	0.46879
		11.511			-1.78559
		3.663			-3.12259	1.06111
		0.954			-2.9251	-0.0204516
		4.653			-1.57478	-0.0204516
		7.236			#NUM!	-0.0204516
		26.586			-2.55832	0.0715138
		1.035			-3.73802	1.42465
		1.179			-2.39559	0.0149403
		9.684			-3.41066	0.859499
		31.068			-2.01682	0.0111474
		13.284			-2.70159	0.497068
		16.605			-3.46502	0.991669
		3.051			-2.82819	1.22024
		13.869			-3.17871
		3.15			-2.44245	1.14205
		9.531			-2.53052	0.498311
		0.954			-0.442725	-0.091515
		4.419			-0.354808	-0.0204516
		3.978			-1.91847	0.645324
		0.81			-2.24666	0.979138
		9.81			-3.94214
		0.954			-3.2609	1.32123
		0.954			-0.444793	-0.0204516
		3.051			-2.47085	-0.0204516
		4.077			-2.10963	0.484442
		1.251			-1.06615	0.610341
		10.998			-1.3924	0.0972573
		2.88			-2.31682	1.04131
		20.952			-0.917323	0.459392
		0.954			-2.26636	1.12333
		2.745			-0.927617	-0.0204516
		3.294			-1.89447	0.438542
					-1.84039	0.517724
					-2.37159
					-2.06592	0.21906
					-4.16399	1.85319
					-3.52716
					-1.42919	0.667733
					-3.2609
					-3.13596
					-3.38583
					-2.40306
					-3.94214
					-2.49498
					-3.27938
					-4.16399
					-2.30867
					-3.56193
					-3.29868
					-1.48912
					-4.16399
					-1.28127	0.599665
					-3.43699
					-3.41066
					-4.16399
					-3.14975
					-3.86296
					-3.12259
					-3.41066
					-0.176558	0.484442
					-2.82156
					-2.56193
					-1.76953	0.420616
					-2.64547
					-2.97835
					-1.59618	0.622628
					-1.15227	0.374198
					-2.94214	0.599665
					-0.60205	0.55084
					-2.16399
					-2.11606
					-3.10963
					-3.14975
					-3.64111
					-2.89292
					-2.76029
					-4.03905
					-1.99372
					-1.95003
					-1.16996	0.729489
					-2.45926
					-0.710617
					-2.95091
					-0.841147	-0.0204516
					-2.04341
					-2.56193
					-2.91683
					-1.35645	-0.0204516
					-3.49498
					-2.08844
					-3.02832
					-3.0848
					-4.64111
					-4.64111
					-3.79601
					-1.40913	0.745231
					-2.47974
					-1.93782
					-3.73802
					-2.79601
					-2.5339
					-2.76605
					-3.86296
					-1.12049
					-2.71683
					-3.2609
					-2.64547
					-3.09704
					-2.64988
					-2.65434
					-3.68686
					-3.64111
					-1.3658
					-1.2273
					-2.9251
					-3.0848
					-1.32682
					-3.94214
					-2.58803
					-1.22247
					-3.64111
					-2.87026
					-1.1014
					-3.38583
					-3.46502
					-3.34008
					-3.52716
					-4.03905
					-4.03905
					-3.05004
					-3.52716
					-3.36235
					-1.91438
					-4.16399
					-4.64111
					-3.52716
					-2.04782
					-2.78985
					-2.59971
					-0.593521
					-0.569299
					-3.46502
					-3.49498
					-2.59189
					-2.421
					-3.22613
					-1.31151
					-3.79601
					-1.24648
					-2.63679
					-2.84872
					-3.16399
					-3.34008
					-3.07291
					-0.605797
					-3.73802
					-0.751413
					-1.20718
					-2.47675	1.49432
					-3.14975	1.52758
					-3.59971	1.48661
					-2.29671	0.82171
					-4.03905
					-3.94214	2.0105
					-2.67262	1.47433
					-2.87768	1.80897
					-3.0848	1.80477
					-2.47085
					-2.95987	1.4331
					-4.34008	1.94702
					-3.41066	1.69705
					-2.91683	1.56127
					-2.42362	1.64638
					-4.34008	2.1401
					-2.55832	0.875929
					-3.20974	1.64594
					-2.27375	1.24361
					-2.22447	0.875929
					-3.52716	1.80861
					-3.86296
					-1.72835	0.796852
					#NUM!
					-4.34008	2.06688
					-3.10963
					-4.34008

## Sheet: Fig 1H
IL1b				IL6				viral load
Abx	FMT-S	FMT-D		Abx	FMT-S	FMT-D		Abx	FMT-S	FMT-D
19.93	1.36	20.94		55.96	6.27	57.85		4.90051	4.47027	5.02421
15.16	7.49	26.44		50.93	49.36	54.94		4.70639	5.02147	4.28795
34.55	10.91	15.72		55.96	60.02	62.67		5.14805	5.12023	4.89608
40.88	2.28	14.79		112.3	1.83	62.01		5.09326	4.53025	4.26822
70.39	3.15	14.76		55.04	2.91	46.59		4.72764	4.89836	4.02235
12.02	13.1	17.28		62.29	60.95	97.15		3.99281	4.93383	4.04433
