# Supplementary material
Source: publisher figshare collection journal article supplement (https://springernature.figshare.com/articles/dataset/_/21334422)
Supplement: Supplementary file 5 [file 1 › Source_Data_Figure_2.xlsx]

## Sheet: Fig 2E
Il1b					Il6					Tnfa					Viral load
GF	A. muciniphila	SF	A. muciniphila+SF		GF	A. muciniphila	SF	A. muciniphila+SF		GF	A. muciniphila	SF	A. muciniphila+SF		SF	A. muciniphila+SF
0.69	0.59	13.01	1.89		1	1.79	22.01	2.35		1.15	1.62	1.6	0.73		3.91029	3.30726
1.38	1.09	13.36	7.84		1.08	1	28.25	17.82		1.08	1.19	2.26	1.12		3.57442	2.86481
1.05	1.27	10.6	4.05		0.92	0.61	31.47	10.12		0.8	0.65	1.89	1.35		3.59682	3.25883
		13.23	6.08				28.5	12.28				1.53	1.32		3.61132	2.99258
		16.19	5.74				18.66	5.72				1.39	1.52		3.79082

## Sheet: Fig 2H
IL1b
	PBS								Abx								AKK
3 dpi	16.83	14.34	17.44	16.19	9.81	16.62	24.27	11.63	12.8	9.15	14.61	14.47	14.81	9.05	12.74	13.5	10.52	7.78	7.98	7.85	7.2	8.66	9.7	11.24
5 dpi	33.17	45.41	48.29	37.33	35.58	23.5	8.63	16.63	39.64	28.1	63.66	23.97	69.62	37.81	41.25		21.19	26.88	13.36	20.31	22.73	20.37	29.62	13.63
IL6
	PBS								Abx								AKK
3 dpi	34.02	42.37	29.33	39.68	38.33	40.8	41.22	43.63	47.21	44.28	51.28	55.04	46.64	35.65	41.75	50.93	43.51	34.81	39.55	36.02	38.5	35.06	50.71	35.81
5 dpi	33.37	16.26	73.05	72.1	74.61	31.56	47.92	54.9	62.39	35.69	68.52	95.78	44.59	128.52	46.2		44.32	27.32	56.19	32.57	44.07	41.95	34.6	36.07
Tnfa
	PBS									Abx								AKK
3 dpi	4.29	4.12	3.52	3.95	3.94	4.24	4.23	4.32		4.53	5.22	4.76	6.11	9.07	3.5	6.02	5.39	4.48	4.69	5.27	5.29	5.68	4.48	3.65	5.29
5 dpi	4.47	3.07	4.55	5.35	6.57	3.63	6.83	5.56	3.1	9.12	7.59	5.47	10.58	5.65	9.19	8	6.07	5.49	3.24	5.68	3.27	6.48	5.81	4.68	3.97
