# Supplementary material
Source: publisher figshare collection journal article supplement (https://springernature.figshare.com/articles/dataset/_/21334422)
Supplement: Supplementary file 5 [file 1 › Source_Data_Figure_3.xlsx]

## Sheet: Fig 3A
SF-S vs. Non-SF						SF-S vs. SF-D
Name	log2FC	-log10 adjusted p	Significant			Name	log2FC	-log10 adjusted p	Significant
Taurolithocholic acid sodium salt	2.15011	32.6455	yes			Galactinol	1.86724	3.06162	yes
N-Methylhydantoin	1.50174	14.6897	yes			N-Formylkynurenine	1.71731	2.17017	yes
Mag (18:1)	1.25765	15.0764	yes			Ip7G	1.60395	1.86236	yes
L-Malate	1.18291	39.0604	yes			Glycocholic acid hydrate	1.54942	1.10114	no
2-Hydroxyphenylacetic acid	1.17892	5.70759	yes			Taurohyocholic acid sodium salt	1.43296	2.27383	yes
4-Hydroxy-3-methylbenzoic acid	1.12338	4.11049	yes			Tauro-alpha-Muricholic acid sodium salt	1.3537	2.15161	yes
N-Acetylneuraminic acid	0.889555	0.449096	no			Kynurenic acid	1.18913	2.50593	yes
D-Gluconic acid	0.864153	1.62972	yes			Trehalose	1.10152	2.56706	yes
D-Galactonic acid	0.819979	1.67133	yes			L-Cystathionine	1.01424	2.44789	yes
Succinic anhydride	0.805364	12.0658	yes			Nicotinamide N-oxide	0.963983	69.3395	yes
MAG (18:2)	0.803858	6.72573	yes			Sucrose	0.93361	1.3088	yes
D-3-Phenyllactic acid	0.799355	6.18468	yes			Hydrocortisone 17-butyrate	0.888155	1.64589	yes
Tartaric Acid	0.78824	15.4961	yes			Ureidosuccinic acid	0.861087	7.42621	yes
D-Ribose	0.777679	12.6491	yes			carbamaoyl asparatate	0.804221	5.77246	yes
Tropolone	0.676559	3.32997	yes			Asp-Phe methyl ester	0.771769	3.83083	yes
Nelarabine	0.650125	15.1074	yes			Taurochenodeoxycholic acid sodium salt	0.755766	1.82681	yes
N-lactoyl-phenylalanine	0.606834	5.97397	yes			D-Glucarate	0.727971	7.80423	yes
Linoleic Acid (C18:2N6C)	0.587737	7.6776	yes			Punicic Acid	0.72137	23.768	yes
Lysops 22:6	0.585052	4.97038	yes			Alpha-Linolenic acid	0.710833	19.3571	yes
4-Pyridoxic acid	0.583417	4.44118	yes			Taurodeoxycholic acid sodium salt	0.704148	2.45764	yes
Linolelaidic Acid (C18:2N6T)	0.582922	7.52312	yes			Nitroxoline	0.703918	1.39393	yes
Deoxycholic acid	0.57553	5.11302	yes			L-Kynurenine	0.695361	3.22504	yes
acetoacetate	0.567043	6.26649	yes			N4-Acetylcytidine	0.644582	3.11771	yes
2-Hydroxybutyric acid	0.551163	7.60641	yes			scyllo-Inositol	0.640455	14.7484	yes
Hydroxypyruvic acid	0.548677	5.3808	yes			1,3 bisphopshoglycerate	0.638376	34.7598	yes
Capric acid	0.547805	5.50172	yes			1,3-diphopshateglycerate	0.619704	34.789	yes
Chenodeoxycholic acid	0.536933	8.45977	yes			3-(2-Hydroxyphenyl)propionic acid	0.617084	2.44381	yes
(S)-2-Hydroxybutanoicacid	0.534513	7.40292	yes			2,3-Dinor-TXB2	0.612054	0.650478	no
Tiglic acid	0.526748	5.80453	yes			Phenylbutazone	0.589387	17.3948	yes
Palmitoleic Acid (C16:1)	0.522429	6.14841	yes			L-Normetanephrine	0.582722	2.76623	yes
Hydantoin-5-propionic acid	0.521626	5.35181	yes			Glycochenodeoxycholic acid sodium salt	0.581376	0.81585	no
Hydroquinone	0.515394	0.0375844	no			D-2-Aminoadipic acid	0.576427	19.1302	yes
3beta-Ursodeoxycholic acid	0.50294	9.20415	yes			Glycodeoxycholic acid	0.573428	0.821076	no
3-Indoleacrylic acid	0.502741	1.99465	yes			Glycoursodeoxycholic acid	0.556923	0.770778	no
4-Methyl-2-pentanone	0.482899	2.8481	yes			L-SelenoMethionine	0.555724	16.1824	yes
Cis-4,7,10,13,16,19-Docosahexaenoic Acid(C22:6N3)	0.482577	5.92337	yes			Feruloyl Putrescine	0.540966	1.26896	no
Arachidic acid	0.481872	8.44011	yes			Trans-Cinnamic Acid	0.53004	1.9465	yes
Choline bitartrate	0.463681	5.78443	yes			N alpha-Acetyl-L-Arginine	0.52997	1.22694	no
Oxoadipic Acid	0.455466	4.67177	yes			Lysops 22:6	0.519698	3.07053	yes
Phthalic Acid	0.44453	7.37733	yes			Phthalic Acid	0.517417	1.96605	yes
Ergothioneine	0.438442	4.95453	yes			cis-gondoic acid	0.515525	20.1483	yes
Asp-Phe methyl ester	0.429626	4.77785	yes			7-Methylguanine	0.514707	2.12249	yes
N-Formylkynurenine	0.42641	7.37872	yes			Hydrocortisone acetate	0.511743	2.69467	yes
7-Methylguanine	0.42399	7.33504	yes			Oleamide	0.504798	1.34472	yes
5-Hydroxyhexanoic Acid	0.421633	0.478652	no			MAG (18:2)	0.501668	0.519639	no
Creatine	0.417265	7.50877	yes			Guggulsterone	0.501317	21.2042	yes
Benzamidine Hydrochloride Hydrate	0.417141	7.07249	yes			2-Methylbutyroylcarnitine	0.500594	0.682008	no
gamma-Nonanolactone	0.416722	7.30697	yes			Acetylcholine	0.50006	3.05254	yes
2-(Formylamino)Benzoic Acid	0.415888	7.00743	yes			Niflumic Acid	0.498498	1.04029	no
L-Normetanephrine	0.413256	6.62751	yes			D-Xylulose 5-phosphate	0.496524	7.80454	yes
Trans-Cinnamic Acid	0.411391	6.99336	yes			2,6-Dimethylaniline	0.496471	2.03927	yes
Guanidineacetic acid	0.407517	2.98541	yes			Benzamidine Hydrochloride Hydrate	0.49191	1.97101	yes
Dl-Tropic acid	0.406361	6.91186	yes			Carnitine-C5	0.490529	0.742508	no
2,6-Dimethylaniline	0.405922	6.77637	yes			Glucarate O-Phosphoric Acid	0.487471	1.41862	yes
6-Methylmercaptopurine	0.405648	7.09436	yes			10E,12Z-Octadecadienoic acid	0.486772	2.93756	yes
3-(2-Hydroxyphenyl)propionic acid	0.401959	8.13648	yes			6-Methylmercaptopurine	0.484783	1.97071	yes
Desaminotyrosine	0.398463	6.81663	yes			gamma-Nonanolactone	0.480776	1.87668	yes
Cuminaldehyde	0.391932	6.36838	yes			Dl-Tropic acid	0.480617	2.08189	yes
beta-Hydroxyisobutyrate	0.388075	3.55283	yes			Erucamide	0.479959	31.2041	yes
(R)-3-Hydroxyisobutyric acid	0.384396	3.5517	yes			aminoimidazole carboxamide ribonucleotide	0.475726	28.9089	yes
Purine	0.375446	6.51512	yes			2-(Formylamino)Benzoic Acid	0.472829	2.03458	yes
2-Methylsuccinic Acid	0.37481	7.36878	yes			Desaminotyrosine	0.470882	2.19212	yes
2,6-Dihydroxypurine	0.372702	1.77998	yes			Feruloylcholine	0.467647	2.63192	yes
hydroxyphenylpyruvate	0.348049	3.98074	yes			2-Hydroxy-2-methylbutanoic acid	0.452959	22.5926	yes
2,3-Dinor-TXB2	0.339379	4.72292	yes			N-gamma-Acetyl-N-2-Formyl-5-Methoxykynurenamine	0.440507	0.19634	no
Hexadecanedioic acid	0.33908	4.89803	yes			Purine	0.43737	2.08648	yes
Urocanic acid	0.338402	2.56184	yes			Cuminaldehyde	0.43405	1.58148	yes
23-Norcholic acid	0.334079	5.57611	yes			2-(Dimethylamino)Guanosine	0.422879	2.2234	yes
Cholic acid	0.319488	0.0622011	no			NG,NG-Dimethyl-L-arginine	0.417014	1.3833	yes
3-Guanidinopropanoate	0.299351	4.65012	yes			Menaquinone	0.408854	2.6954	yes
(+,-)-Octopamine HCl	0.296251	1.85756	yes			Sebacic acid	0.394536	0.268397	no
N-Oleoyl Glycine	0.293477	3.5586	yes			4-Hydroxy-3-methylbenzoic acid	0.385446	1.39789	yes
S-Sulfo-L-cysteine	0.292186	1.79472	yes			Meclocycline	0.374064	2.56374	yes
Sodium cholate	0.291765	0.136394	no			Carnitine-C8	0.373262	1.09432	no
L-Gulono-1,4-lactone	0.287082	0.489969	no			N6-Succinyl Adenosine	0.367146	2.13047	yes
Dl-P-Hydroxyphenyl lactic acid	0.286793	2.11081	yes			N-Tetradecanamide	0.366937	2.20098	yes
L-Erythrulose	0.277868	3.93584	yes			Pseudouridine	0.360764	1.40015	yes
D-Phenylalanine	0.276378	6.26761	yes			3-Ureidopropionate	0.36031	0.535379	no
O-Acetyl-L-carnitine	0.272374	3.21129	yes			L-Ornithine	0.354169	0.651847	no
Hydroxyphenyllactic acid	0.268502	2.09438	yes			Pyrrole-2-Carboxylic Acid	0.354159	1.58783	yes
5-Methoxytryptophol	0.266713	1.80151	yes			Myristic acid	0.34983	3.54605	yes
1,4-Dihydro-1-Methyl-4-Oxo-3-Pyridinecarboxamide	0.264081	0.681664	no			D-Phenylalanine	0.347671	2.08688	yes
Acetylcarnitine	0.26356	2.91315	yes			D-Ribose	0.342635	1.49278	yes
Oleoyl-L-alpha-lysophosphatidic acid	0.261364	1.68302	yes			Urea	0.327863	3.08443	yes
N-Acetyl-DL-phenylalanine	0.260682	1.28303	no			D-Myo-inositol 4-monophosohate	0.312553	1.64747	yes
Isonicotinamide	0.240207	2.46758	yes			SDMA	0.310267	0.791295	no
Oxypurinol	0.228008	0.301211	no			D-3-Phenyllactic acid	0.309056	0.564202	no
4-Acetamidobutyric Acid	0.220877	3.36906	yes			Sotalol	0.304298	0.803316	no
N7-Methylguanosine	0.214181	4.44272	yes			7-Ketocholesterol	0.289956	1.15296	no
D-Mannose 6-phosphate	0.213149	1.41671	yes			N-Acetylthreonine	0.286948	1.15533	no
Nicotinamide	0.211006	1.78555	yes			2-Hydroxyphenylacetic acid	0.282173	0.973887	no
2-Phenylbutyric acid	0.207517	1.95108	yes			4-Hydroxyretinoic Acid	0.280588	2.71692	yes
16alpha-Hydroxytestosterone	0.206223	4.08916	yes			1-Methylhistidine	0.273405	0.867606	no
Indolelactic acid	0.203849	1.08141	no			Oxoadipic Acid	0.273284	0.287628	no
D-Glucuronic acid	0.203515	0.435594	no			(+,-)-Octopamine HCl	0.269129	2.44085	yes
Carbamoylphosphate	0.20273	1.42687	yes			L-Homocitrulline	0.266943	0.772655	no
Ethyl myristate	0.202476	4.14393	yes			Creatinine	0.26479	0.956504	no
D-Galactose	0.202197	4.0024	yes			Hexadecanamide	0.263291	0.993212	no
Indoleacetaldehyde	0.197265	1.10882	no			4-Hydroxy-L-Glutamic Acid	0.255428	19.3619	yes
1-Methylguanosine	0.195753	3.92754	yes			Picolinamide	0.248529	2.39211	yes
N-Acetyl-D-glucosamine 6-phosphate	0.195753	1.2698	no			H-Gly-Pro-OH	0.242981	0.584234	no
Hexadecanoic Acid (C16:0)	0.193727	3.97677	yes			N-Acetyl-L-glutamic acid	0.23812	1.27161	no
farensyl diphosphate	0.192849	1.50535	yes			trimethylamine N-oxide	0.236415	0.47988	no
3-Hydroxy-3-Methylpentane-1,5-Dioic Acid	0.192481	6.63194	yes			Enterodiol	0.231372	0.585743	no
N alpha-Acetyl-L-Arginine	0.188371	2.05857	yes			Methionine sulfoxide	0.230926	0.36726	no
Nitroxoline	0.186958	0.245114	no			acetyl phospahte	0.230143	2.08183	yes
L-2-Aminoadipic acid	0.186551	2.80722	yes			Deoxyribose 5-Phosphate	0.228695	1.79724	yes
Picolinamide	0.185076	1.75999	yes			Isobutyryl carnitine	0.221759	0.458299	no
Feruloyl Putrescine	0.183593	0.650645	no			N6-Acetyl-L-Lysine	0.210124	0.832171	no
11-Ketoetiocholanolone	0.181481	2.99988	yes			1-Methylguanosine	0.204094	1.65786	yes
Glucarate O-Phosphoric Acid	0.180875	0.820893	no			Taurocholic acid	0.203188	1.21448	no
Oleamide	0.180142	0.343864	no			Carnitine-C4	0.200286	0.406128	no
O-Acetyl-L-homoserine	0.179682	6.68614	yes			5beta-Androstan-3beta-ol-17-one	0.198047	1.03327	no
D-2-Aminobutyric Acid	0.177574	3.68743	yes			Thioguanine	0.189594	0.81828	no
Methylmalonate	0.176125	1.30495	yes			16alpha-Hydroxytestosterone	0.187098	2.08445	yes
L-Carnitine	0.175562	6.46595	yes			Tryptophanol	0.183727	1.58036	yes
Fructose	0.173658	2.01136	yes			4-Methyl-2-pentanone	0.182126	0.176862	no
Sucrose	0.172411	1.88249	yes			3-N-Methyl-L-histidine	0.175857	0.325629	no
5-oxoproline	0.171142	1.87767	yes			N-lactoyl-phenylalanine	0.175681	1.30529	yes
Propionyl-L-carnitine	0.159799	2.18405	yes			Carnitine-C6	0.170304	1.31017	yes
Niflumic Acid	0.154837	0.483933	no			Isomaltose	0.170039	0.0625691	no
3-(2-Naphthyl)-D-Alanine	0.153983	0.0586221	no			Glycohyocholic acid Sodium salt	0.169902	1.40252	yes
Hydrocortisone	0.153777	1.7122	yes			11-Ketoetiocholanolone	0.161024	2.15376	yes
Ethylmalonate	0.153009	0.140536	no			Pantetheine	0.158111	5.47889	yes
Succinic acid	0.152169	1.14376	no			L-aspartic Acid	0.151633	1.76504	yes
L-Fucose	0.15125	1.14355	no			P-Coumaroyl Agmatine	0.138849	4.30725	yes
L-Pyroglutamic acid	0.149745	1.33243	yes			Choline bitartrate	0.138196	0.258106	no
Kynurenic acid	0.148081	2.53918	yes			3-Hydroxyhippuric Acid	0.133598	3.34985	yes
Deoxyribose 5-Phosphate	0.14789	1.05366	no			Dl-Threitol	0.121344	0.0184711	no
L-cysteine	0.147734	1.69748	yes			Palmitoylethanolamide	0.118564	3.86338	yes
alpha-D-Glucose	0.147342	2.20345	yes			Mexiletine	0.115622	0.837717	no
H-Abu-OH	0.147091	3.2973	yes			6-Hydroxymelatonin	0.114297	2.39682	yes
N4-Acetylcytidine	0.145577	1.47068	yes			Asaraldehyde	0.111622	0.288463	no
Monobutyl phthalate	0.145166	1.40034	yes			Nicotinamide	0.111605	1.56746	yes
Dimethyl fumarate	0.14031	2.89715	yes			Vitamin B2	0.107121	0.149557	no
Tetradecanedioic acid	0.139443	3.08926	yes			7-Methyluric acid	0.105661	7.08298	yes
10-Undecenoic acid	0.138096	2.66568	yes			All-Trans-13,14-Dihydroretinol	0.101357	1.66629	yes
3-Hydroxyisovaleric acid	0.137221	1.71432	yes			1D-chiro-Inositol	0.0990533	0.298579	no
L-Kynurenine	0.134356	1.68493	yes			23-Norcholic acid	0.0875771	0.781808	no
1,3-Dimethyluric Acid	0.127571	1.49527	yes			Pyridoxine O-Glucoside	0.0859631	0.667899	no
Imidazoleacetic acid	0.125912	1.29645	no			L-2-Aminoadipic acid	0.0859345	0.280324	no
(S)-Leucic acid	0.125772	0.0834774	no			Nebularine	0.0848032	1.02125	no
L-Rhamnose monohydrate	0.124791	0.37304	no			5'-Deoxy-5'-(Methylthio)Adenosine	0.0753048	0.662038	no
12,13-EODE	0.123211	1.39734	yes			Isonicotinamide	0.0749224	0.985441	no
Erythronolactone	0.12269	1.47425	yes			LysoPE 18:2	0.071574	0.403447	no
Carnitine-C6	0.121979	1.43166	yes			4-Hydroxy-6-methyl-2-pyrone	0.0715412	0.54297	no
4-Hydroxyretinoic Acid	0.120602	1.41777	yes			N7-Methylguanosine	0.070133	0.601441	no
Vitamin B2	0.120065	2.10096	yes			L-(-)-Glyceric acid	0.0679177	0.924254	no
Carnitine-C3	0.117758	0.844919	no			L-Hydroxylysine	0.0664642	0.235332	no
L-Hydroxylysine	0.117365	1.69795	yes			Cocamidopropyl Betaine	0.0654953	0.786479	no
Citric acid	0.117249	0.252177	no			Dl-3,4-Dihydroxymandelic Acid	0.0619067	0.532547	no
Hydroxyglutaric acid	0.116582	1.51154	yes			trans-2-Methyl-2-pentenoic Acid	0.0618773	3.58906	yes
Sotalol	0.116207	1.50559	yes			Sarcosine	0.0566123	0.436567	no
Aldosterone	0.113549	1.38616	yes			Imidazoleacetic acid	0.053143	0.0724311	no
Feruloylcholine	0.11096	0.418175	no			Trigonelline	0.0512843	0.319775	no
10E,12Z-Octadecadienoic acid	0.110887	0.42315	no			Dl-Norleucine	0.0481355	0.438224	no
Furfural	0.109214	1.5276	yes			Dl-3-Hydroxy-kynurenine	0.04366	2.79489	yes
D-Lactic acid	0.108522	0.30461	no			Choline Chloride	0.041685	0.356514	no
5beta-Androstan-3beta-ol-17-one	0.107618	1.2514	no			trans-Aconitic acid	0.0395416	0.783692	no
Hydroxyhydroquinone	0.105917	1.40366	yes			S-Methyl-5'-thioadenosine	0.0362458	0.297906	no
Creatinine	0.104839	2.02109	yes			N-Acetylglycine	0.0346569	0.384988	no
D-Glucopyranose	0.104714	1.50829	yes			Lipoic acid	0.0345503	0.197356	no
O-Aceyl-L-Serine	0.10221	0.974541	no			3-Methoxytyramine	0.0319913	0.262689	no
Allitol	0.101869	1.73279	yes			Levodopa	0.0314754	0.432044	no
Isomaltose	0.0977471	0.593226	no			Oxymetazoline	0.0307893	0.297782	no
13-HOTrE(r)	0.0917366	2.46967	yes			Cortisone	0.0297504	0.185473	no
13-HPODE	0.0882979	1.14462	no			L-Alanine	0.0293202	0.193172	no
2-Methylbutyroylcarnitine	0.0879923	1.24741	no			alpha-D-Glucose	0.0269004	0.16683	no
L(+)-Asparagine monohydrate	0.0877215	0.460835	no			N-Acetyl-L-histidine	0.0220876	0.10266	no
DL-o-Tyrosine	0.0875883	0.769978	no			Estriol	0.0218995	0.152511	no
L-Asparagine	0.0873667	0.484099	no			Cyprodinil	0.0218561	1.14313	no
L-(-)-Glyceric acid	0.0839882	0.997708	no			p-Mentha-1,3,8-triene	0.0213768	0.296439	no
1D-chiro-Inositol	0.0835184	1.24314	no			Taurohyodeoxycholic acid sodium salt	0.0169852	0.0487649	no
Palmitaldehyde	0.0829811	1.11774	no			Phthalic Anhydride	0.0165321	0.0754577	no
γ-Linolenic Acid(C18:3N6)	0.0821422	0.524411	no			Trimethyllysine	0.0131034	0.0200174	no
Galactinol	0.081533	2.34949	yes			Methylguanidine HCl	0.0107472	0.128759	no
Carnitine-C5	0.0801405	1.11856	no			Capric acid	0.00898659	0.107224	no
Melamine	0.0792424	0.591327	no			Melamine	0.00878025	0.0104324	no
9-HpOTrE	0.0775943	4.75986	yes			Pyridoxine	0.0085412	0.20207	no
SDMA	0.0746016	0.807004	no			Dimethyl fumarate	0.00803366	0.0106611	no
Quinic acid	0.0731981	0.347457	no			5-Methoxyindole-3-Carbaldehyde	0.00796851	0.0154798	no
Sebacic acid	0.0649234	0.837592	no			Tartaric Acid	0.00785563	0.015405	no
Carnitine-C4	0.0637992	0.446734	no			Methyl alpha-D-glucopyranoside	0.0066396	0.323886	no
5beta-Androstane-3,17-dione	0.0615193	2.64117	yes			Methionine	0.00590706	0.416355	no
3-Methyl-2-oxobutanoic acid	0.0599476	0.265305	no			3-Phenoxypropionic acid	0.00453692	0.0506117	no
2-(Dimethylamino)Guanosine	0.0573297	1.1978	no			Choline Hydroxide	0.0041712	0.0803355	no
Ip7G	0.0563108	1.54037	yes			Acetylcarnitine	0.00222661	0.285657	no
4-Hydroxyisoleucine	0.0562735	0.285253	no			Cytarabine	0.000948195	0.0615626	no
DL-3,4-Dihydroxyphenyl glycol	0.053354	0.624268	no			5-Hydroxylysine	-0.00103969	0.054845	no
L-Glutamic acid monosodium salt	0.0518126	0.229624	no			Furfural	-0.00125252	0.0458284	no
9,10-Dihome	0.0512011	0.552199	no			Oxindole	-0.0017906	0.359283	no
Octanedioic acid	0.0506298	0.752873	no			Methyl beta-D-galactopyranoside	-0.00263465	0.240208	no
1,5-Anhydro-D-Glucitol	0.0484316	0.121089	no			Ergothioneine	-0.00356985	0.182282	no
4-Nitrophenol	0.047075	0.654631	no			N,N-Dimethylglycine	-0.00481375	0.0159028	no
Azelaic acid	0.046456	0.275044	no			Allitol	-0.00486603	1.92214	yes
Isobutyryl carnitine	0.0461167	0.413638	no			Hydrocortisone	-0.00564082	0.212097	no
Dl-2-Amino-3-phosphonopropionic acid	0.0458965	0.754891	no			1-Methylhistamine	-0.00849628	0.142814	no
7-Ketocholesterol	0.0453315	0.636624	no			3-Aminoisobutyric acid	-0.00893339	0.0719256	no
N-Tetradecanamide	0.0444698	0.25828	no			Betaine	-0.00978897	0.0870882	no
Glycylglycine	0.0419052	0.135266	no			3-(2-Naphthyl)-D-Alanine	-0.0101104	3.12556	yes
Mexiletine	0.038405	0.471207	no			3-Nitro-L-Tyrosine	-0.0127049	0.00681951	no
Traumatic acid	0.0376007	0.909199	no			Sedoheptulose Anhydride	-0.0156575	0.264448	no
Carnitine-C14	0.0374831	0.392932	no			Isoetharine	-0.0192237	0.00782923	no
Carnosine	0.0329126	0.408331	no			Allantoin	-0.0231698	0.284558	no
4-Hydroxyphenylpyruvic Acid	0.0325425	0.24557	no			Pyridoxamine	-0.0271124	0.0621118	no
Dipicolinic acid	0.031463	0.541948	no			2-Furoylglycine	-0.0289436	0.261343	no
Dl-3,4-Dihydroxymandelic Acid	0.0307308	0.228526	no			Etiocholanolone	-0.0290429	0.027906	no
Shikimic Acid	0.0302158	0.346796	no			Malathion	-0.0315322	0.109684	no
L-Ornithine	0.0299603	0.584952	no			Tryptamine	-0.0325519	0.0427125	no
Hexadecanamide	0.0295308	0.182722	no			4-Acetamidobutyric Acid	-0.0384323	0.151778	no
Undecanedioic acid	0.0286462	0.540256	no			N-Lauryldiethanolamine	-0.0407665	0.129261	no
o-Toluic Acid	0.0273164	0.818629	no			Aldosterone	-0.042347	1.66193	yes
Palmitoylethanolamide	0.0272853	0.174143	no			Kinetin	-0.0488462	0.0626935	no
Cortisone	0.027168	0.445734	no			Hydantoin-5-propionic acid	-0.0513845	0.0588017	no
N6-Acetyl-L-Lysine	0.0254094	0.150813	no			Solvent Red 23	-0.0530203	0.725156	no
acetyl phospahte	0.0244796	0.040599	no			Cystine	-0.0535831	0.124491	no
Pentadecanoic acid	0.024014	0.766413	no			19-Nortestosterone	-0.0588523	0.32817	no
6-Hydroxymelatonin	0.0236401	0.304002	no			O-Acetyl-L-homoserine	-0.0620004	0.365183	no
Nebularine	0.0235295	0.306988	no			5-Hydroxyindole-3-acetic acid	-0.0626197	0.347677	no
3-Aminoisobutyric acid	0.0220196	0.30915	no			Octadeca-11E,13E,15Z-trienoic acid	-0.0658232	0.312517	no
Phthalic Anhydride	0.0190698	0.250946	no			Dl-3-Hydroxynorvaline	-0.0662625	0.223159	no
7-Methyluric acid	0.018152	1.22692	no			O-Acetyl-L-carnitine	-0.0667866	0.20468	no
Homocysteic acid	0.0178396	0.0465333	no			Noradrenaline	-0.0710283	0.307923	no
3-Ureidopropionate	0.0175605	0.627918	no			Isoproterenol	-0.0710767	1.52009	yes
NG,NG-Dimethyl-L-arginine	0.0175044	0.113458	no			(R)-3-Hydroxyisobutyric acid	-0.0715511	0.159194	no
Trehalose	0.0162002	2.75747	yes			6-Phosphogluconic Acid Trisodium Salt	-0.0729947	0.597927	no
1-(4-Methoxyphenyl)-2-propanone	0.0158832	0.0268478	no			Fexofenadine	-0.0745818	0.445308	no
L-Histidine	0.0140927	0.0668667	no			Mag (18:1)	-0.0754715	0.0608817	no
DL-m-Tyrosine	0.0131968	0.0338002	no			4-Amino-5-imidazolecarboxamide	-0.075581	0.1355	no
L-Methionine sulfone	0.0129766	0.00747101	no			N-Methyl-a-aminoisobutyric acid	-0.0771329	0.235265	no
L-Glutamate	0.0109132	0.149223	no			Tauroursodeoxycholic acid Dihydrate	-0.0801595	0.0397268	no
2-(3,4-dimethoxyphenyl)ethanamine	0.0107125	0.0928839	no			Adrenochrome	-0.0808472	0.217798	no
Adipic Acid	0.010618	0.0402884	no			N-Acetyl-DL-phenylalanine	-0.0823781	0.57142	no
Uracil	0.0106101	0.277204	no			3-Guanidinopropanoate	-0.086911	0.236488	no
Methyl beta-D-galactopyranoside	0.010608	1.02583	no			Ergosta-5,7,9(11),22-Tetraen-3-beta-Ol	-0.0879894	0.202221	no
2-Hydroxycinnamic acid	0.0100938	0.000401742	no			1,3-Dimethyluracil	-0.0925567	0.0800977	no
4-Hydroxy-L-Glutamic Acid	0.00945344	0.33665	no			L-Glutamate	-0.0931968	0.311212	no
Nonadecanoic acid	0.00762942	0.252059	no			L-Lactic acid	-0.0957665	0.270947	no
LysoPE 18:0	0.00461785	0.0822753	no			2-(3,4-dimethoxyphenyl)ethanamine	-0.0972556	0.426513	no
L-Tyrosine	0.00413442	0.0668021	no			Hydroquinone	-0.0981329	0.928991	no
L-(-)-alpha-Amino-epsilon-Caprolactam	0.00379015	0.0240323	no			L-beta-Imidazolelactic acid	-0.0998819	0.939034	no
3-Hydroxyhippuric Acid	0.00295497	0.0510966	no			Ergosterol	-0.102779	0.206119	no
L-beta-Imidazolelactic acid	0.00102409	0.0659913	no			O-Desmethylnaproxen	-0.102922	0.592624	no
Deoxycorticosterone	0.000568203	0.156674	no			DL-Norvaline	-0.103928	0.398973	no
L-lysine	-6.50189e-05	0.0286993	no			Nonadecanoic acid	-0.104143	2.46357	yes
Lactic acid	-0.000398228	0.238082	no			2-Hydroxycinnamic acid	-0.109218	0.43405	no
Methyl alpha-D-glucopyranoside	-0.000561443	0.817587	no			Urocanic acid	-0.112772	0.128667	no
D-Fructose 6-phosphate	-0.000860149	0.126939	no			L-Tyrosine	-0.116186	0.374896	no
6-Deoxy-D-glucose	-0.00110399	0.0384998	no			6-Deoxy-D-glucose	-0.116305	0.524349	no
Pimelic acid	-0.00144995	0.107322	no			L-Valine	-0.118742	0.49008	no
Mefenamic acid	-0.00153731	0.0497816	no			Creatine	-0.119974	0.180721	no
Ala-Gln	-0.00190212	0.0768077	no			D-Glucopyranose	-0.120871	0.450504	no
1-Methylhistamine	-0.00260111	0.11861	no			1-(4-Methoxyphenyl)-2-propanone	-0.121091	0.429243	no
trans-2-Methyl-2-pentenoic Acid	-0.00278313	0.0915799	no			5beta-Androstane-3,17-dione	-0.121888	4.3618	yes
CMPF	-0.00289855	0.0202624	no			Hypoxanthine	-0.123081	0.0303317	no
Pyrrole-2-Carboxylic Acid	-0.00351176	1.42628	yes			D-Galactose	-0.123097	0.643236	no
Ala-gly	-0.00394023	0.0513999	no			Uracil	-0.123668	0.0339178	no
Alloxan	-0.00604924	0.0176409	no			Pentadecanoic acid	-0.126426	2.26175	yes
N,N-Dimethylglycine	-0.00616852	0.0492405	no			L-Methionine sulfone	-0.12723	0.427599	no
Oxymetazoline	-0.00707687	0.286469	no			Fructose	-0.12917	0.544814	no
3-Methyladipic acid	-0.00884466	0.0437173	no			L-Carnitine	-0.135006	1.05838	no
Isoproterenol	-0.00901959	0.223108	no			Shikimic Acid	-0.135641	0.47625	no
Guggulsterone	-0.0106348	0.0222332	no			Dibutyl phthalate	-0.136075	0.821225	no
Octadeca-11E,13E,15Z-trienoic acid	-0.0142862	0.162134	no			L-(-)-alpha-Amino-epsilon-Caprolactam	-0.136665	0.673304	no
Inositol	-0.0150581	0.17392	no			L-Citrulline	-0.138353	0.541784	no
D-Glyceraldehyde 3-phosphate	-0.0166173	0.0177852	no			(3-Methoxy-4-hydroxyphenyl)ethylene glycol sulfate	-0.142224	0.692017	no
Fosfomycin	-0.016731	0.0334624	no			3-Hydroxy-3-Methylpentane-1,5-Dioic Acid	-0.14348	1.06092	no
6-Sialyllactose	-0.0173452	1.67777	yes			Homocysteic acid	-0.143891	0.600455	no
Sedoheptulose Anhydride	-0.0174288	0.431324	no			DL-Citrulline	-0.145386	0.593755	no
L-Glutamine O-Hexside	-0.0176493	0.0837074	no			Styrene	-0.14746	0.520617	no
Malathion	-0.0176968	0.438066	no			Lysine Butyrate	-0.147521	0.294694	no
D-glutamine	-0.0182411	0.220428	no			Glycerol-3-phosphate	-0.155059	0.281686	no
DL-Serine	-0.0182502	0.248979	no			Dl-2-Amino-3-phosphonopropionic acid	-0.155843	3.78546	yes
Dl-3-Hydroxy-kynurenine	-0.0187391	0.525666	no			Sulfoacetic acid	-0.155846	0.487216	no
Acetylcholine	-0.0188453	0.0687067	no			L-Hydroxyproline	-0.161278	0.934041	no
Methionine sulfoxide	-0.0199366	0.0217396	no			5,6-Dihydro-5-Methyluracil	-0.165792	1.0608	no
(5-L-Glutamyl)-L-Amino Acid	-0.0199669	0.105916	no			DL-m-Tyrosine	-0.165995	0.865067	no
Cocamidopropyl Betaine	-0.0204938	0.549829	no			2-Methylsuccinic Acid	-0.16779	0.387901	no
5,6-Dihydroxyindole-2-Carboxylic Acid	-0.0229346	0.557099	no			Hippuric acid	-0.175242	0.0616719	no
P-Coumaroyl Agmatine	-0.0231265	0.578378	no			Carnitine-C12	-0.179492	0.668038	no
Calcium D-Panthotenate	-0.0244369	0.043278	no			Inositol	-0.180849	0.0452197	no
Xanthurenic Acid	-0.0262247	0.096263	no			Carnitine-C3	-0.181361	0.367714	no
Urea	-0.027005	0.196858	no			L-Saccharopine	-0.182087	0.734623	no
L-Pipecolate	-0.0276165	0.326116	no			Methyl 3-Hydroxyphenylacetate	-0.183859	0.058573	no
Thioguanine	-0.0277789	0.211893	no			beta-Hydroxyisobutyrate	-0.184224	0.404245	no
(3-Methoxy-4-hydroxyphenyl)ethylene glycol sulfate	-0.0283895	0.145508	no			Phosphoethanolamine	-0.185513	0.113602	no
Sorbitol	-0.031824	0.0921859	no			Oleoyl-L-alpha-lysophosphatidic acid	-0.186183	0.222557	no
N-Lauryldiethanolamine	-0.0320275	0.682244	no			5-Methoxyindole-3-acetic acid	-0.187848	0.924077	no
Uric Acid	-0.0335406	0.299939	no			5,6-Dihydroxyindole-2-Carboxylic Acid	-0.188726	7.94877	yes
D-Glucose 6-phosphate	-0.0337967	0.011209	no			5-oxoproline	-0.190537	0.568822	no
3-Nitro-L-Tyrosine	-0.0346593	0.922027	no			Glu-Glu	-0.198213	1.18582	no
Solvent Red 23	-0.0348155	1.27082	no			Carnosine	-0.202323	1.22418	no
4-Hydroxy-2-Oxoglutaric Acid	-0.0348357	0.102122	no			Hexadecanedioic acid	-0.205693	0.406279	no
2-Hydroxy-3-methylbutanoic acid	-0.0356678	0.290835	no			o-Toluic Acid	-0.20855	5.0447	yes
trans-Aconitic acid	-0.0368801	0.824726	no			D-glutamine	-0.208824	1.8636	yes
Lysope 18:1	-0.0373846	0.463696	no			L-Erythrulose	-0.211467	0.482427	no
Cycloleucine	-0.037582	0.45069	no			Spermidine	-0.214715	0.0381559	no
Carnitine-C18	-0.037733	0.241501	no			Propionyl-L-carnitine	-0.215517	0.536865	no
Kinetin	-0.0378653	0.685386	no			Stachydrine	-0.219561	0.369551	no
Ergosterol	-0.0382461	0.570284	no			Sphinganine	-0.222808	0.570243	no
6-Phosphogluconic Acid Trisodium Salt	-0.0386674	0.750746	no			Dehydrocholic acid	-0.224116	0.731407	no
4-Amino-5-imidazolecarboxamide	-0.0394013	0.177918	no			Nε-(1-Carboxymethyl)-L-lysine	-0.23171	0.750552	no
Pipecolic acid	-0.040314	0.424114	no			Pipecolic acid	-0.233561	1.62644	yes
Stachydrine	-0.0407082	0.903127	no			Serotonin	-0.235164	0.448395	no
cis-gondoic acid	-0.0409004	0.35919	no			L-lysine	-0.237417	2.90235	yes
cis-4-Hydroxy-D-proline	-0.0416523	0.26031	no			L-Pipecolate	-0.245889	1.4148	yes
Ergosta-5,7,9(11),22-Tetraen-3-beta-Ol	-0.0416679	0.63939	no			L-Thyroxine	-0.24711	1.41784	yes
19-Nortestosterone	-0.0423011	0.849324	no			Pipecolinic Acid	-0.249103	2.00282	yes
Butylmalonic acid	-0.042404	0.266616	no			6-Aminohexanoate	-0.250917	1.76847	yes
Dibutyl phthalate	-0.0430833	0.548689	no			H-Abu-OH	-0.252001	2.40157	yes
Noradrenaline	-0.0431581	0.601874	no			Porphobilinogen	-0.265389	1.51748	yes
Pipecolinic Acid	-0.0440476	0.610069	no			Dl-Dihydrosphingosine	-0.269687	0.950892	no
Choline Hydroxide	-0.0440556	0.436218	no			trans-3-Hydroxy-L-proline	-0.272843	1.99446	yes
Cyprodinil	-0.0454195	1.63233	yes			Quinic acid	-0.275164	0.696819	no
Homoarginine	-0.0463494	0.314425	no			Hydroxyhydroquinone	-0.275932	0.875439	no
P–Hydroxyphenyl Acetic Acid	-0.0475597	0.0257695	no			Lysopc 18:2	-0.276527	1.03808	no
5,6-Dihydro-5-Methyluracil	-0.0480621	0.786126	no			Deoxycorticosterone	-0.276579	1.12428	no
PE(18:1(9Z)/0:0)	-0.0483845	0.539887	no			Lactic acid	-0.282	1.32052	yes
Choline Chloride	-0.0496179	0.53381	no			Allo-Isoleucine	-0.282472	2.15097	yes
Pyridoxine O-Glucoside	-0.0509481	0.640314	no			DL-Leucine	-0.284352	2.20574	yes
Cytarabine	-0.0511378	0.526755	no			11-Cis-Retinol	-0.287138	0.901319	no
Sarcosine	-0.0515611	0.853204	no			Propionylcholine	-0.288431	1.31871	yes
2-Pyrrolidinone	-0.0534046	0.570112	no			Isobutyrylglycine	-0.297795	0.21103	no
trimethylamine N-oxide	-0.0538937	0.236548	no			Mefenamic acid	-0.299814	8.20485	yes
Erucamide	-0.0549942	0.445996	no			1-Aminocyclopropane carboxylic acid	-0.301429	2.86729	yes
Isoetharine	-0.0563815	0.922711	no			Cycloleucine	-0.301949	2.40927	yes
N-Acetylalanine	-0.0571828	0.0939685	no			Succinic anhydride	-0.30415	0.399348	no
Sulfoacetic acid	-0.0579736	0.130703	no			Ala-gly	-0.307589	2.38058	yes
Tryptophanol	-0.058157	0.922783	no			Adipic Acid	-0.308818	2.55889	yes
Methylguanidine HCl	-0.0585246	0.593934	no			Glycylglycine	-0.310591	0.980459	no
2-Aminooctanoic acid	-0.0586381	0.37592	no			Glycine	-0.310876	2.00284	yes
L-Alanine	-0.0591114	0.858619	no			(5-L-Glutamyl)-L-Amino Acid	-0.314545	1.20072	no
Allolithocholic acid	-0.0595026	0.336164	no			p-cresol	-0.314863	0.272983	no
3-Phenoxypropionic acid	-0.060012	1.2734	no			Piperidine	-0.315981	2.32062	yes
Isocitrate	-0.0617265	0.928796	no			Isoquinoline	-0.317369	1.57434	yes
aminoimidazole carboxamide ribonucleotide	-0.0624244	0.503675	no			L-Tryptophan	-0.317595	1.67735	yes
lithocholic acid	-0.0631792	0.377618	no			gamma-Glutamylglutamic acid	-0.319988	1.35392	yes
gamma-Muurolene	-0.063645	0.362762	no			3-Methylindole	-0.322269	1.83198	yes
D-2-Aminoadipic acid	-0.0642687	0.116286	no			L-Glutamine O-Hexside	-0.326086	0.535959	no
N-Methyl-a-aminoisobutyric acid	-0.0643854	0.868911	no			L-Leucine	-0.329424	2.50867	yes
Isoquinoline	-0.0648075	0.256717	no			Dipicolinic acid	-0.331836	4.79301	yes
D-Xylonic Acid Lithium Salt	-0.0653976	0.0695642	no			Choline Glycerophosphate	-0.332933	1.28229	no
O-Desmethylnaproxen	-0.0654688	1.31959	yes			5-Aminolevulinate	-0.333251	2.39803	yes
N-Acetylglycine	-0.0663252	1.81697	yes			6-Sialyllactose	-0.337691	0.794243	no
Myristic acid	-0.0676156	0.171956	no			Dl-Indole-3-lactic acid	-0.337965	1.75198	yes
N-Carbamyl-L-glutamicacid	-0.0682783	1.71554	yes			2-Aminooctanoic acid	-0.338889	1.37613	yes
Glycochenodeoxycholic acid sodium salt	-0.069096	0.689812	no			Lysinamide	-0.341722	1.77933	yes
3-Methoxytyramine	-0.0692594	0.965552	no			Tetradecanedioic acid	-0.343068	4.42857	yes
1,3-Dimethyluracil	-0.0693376	0.434309	no			D-Lactic acid	-0.34525	1.65807	yes
Dulcitol	-0.0696438	0.291734	no			2-Pyrrolidinone	-0.345527	2.45608	yes
Carnitine-C16	-0.0696991	0.710542	no			9-HpOTrE	-0.346277	21.0052	yes
20-Carboxy-Leukotriene B4	-0.0701799	0.165881	no			4-Aminobenzoate	-0.34883	0.0639711	no
N-Acetylthreonine	-0.0711893	0.22973	no			Allo-Threonine	-0.350997	2.60209	yes
1-Aminocyclopropane carboxylic acid	-0.0714925	1.10669	no			D-Fructose 6-phosphate	-0.354698	2.06849	yes
Carnitine-C12	-0.0718837	0.148145	no			3-(3-Hydroxyphenyl)propionic Acid	-0.357015	0.900983	no
Pseudouridine	-0.0722402	0.29342	no			2-Piperidinone	-0.357674	0.0419846	no
1-Methylhistidine	-0.0726366	0.2812	no			isoleucine	-0.359339	1.89656	yes
Glycoursodeoxycholic acid	-0.073609	0.656807	no			D-2-Aminobutyric Acid	-0.363209	3.48747	yes
Lipoic acid	-0.0742064	1.6829	yes			Arachidic acid	-0.363251	0.873962	no
L-Valine	-0.07433	0.960485	no			Uridine	-0.3647	1.33519	yes
Dl-Norleucine	-0.0751272	2.11377	yes			gamma-Muurolene	-0.366545	1.92657	yes
5'-Deoxy-5'-(Methylthio)Adenosine	-0.0758231	0.555678	no			Ala-Gln	-0.371809	2.78689	yes
S-Methyl-5'-thioadenosine	-0.0758752	0.5701	no			L-serine	-0.373556	2.65182	yes
gamma-Glutamylglutamic acid	-0.0760613	0.732563	no			L-arginino-succinate	-0.378279	1.22335	no
L-Lactic acid	-0.0774685	0.722929	no			Homoserine	-0.380308	2.22001	yes
Phenylbutazone	-0.0778561	0.979297	no			Azelaic acid	-0.383318	8.79267	yes
Taurochenodeoxycholic acid sodium salt	-0.0780012	0.568693	no			Nelarabine	-0.385699	1.45985	yes
Menaquinone	-0.0792157	1.05927	no			Octanedioic acid	-0.3874	4.72977	yes
Betaine	-0.0812316	2.13226	yes			4-Nitrophenol	-0.388241	11.5355	yes
Glycodeoxycholic acid	-0.0820877	0.676045	no			Uric Acid	-0.40141	0.88001	no
Lysope 16:0	-0.0823026	0.818078	no			Cis-4,7,10,13,16,19-Docosahexaenoic Acid(C22:6N3)	-0.404224	1.0936	no
L-Tryptophan	-0.0843946	0.481326	no			3-Hydroxyisovaleric acid	-0.404357	1.34378	yes
DL-Norvaline	-0.0851142	1.19575	no			N-Methyl-L-arginine hydrochloride	-0.42191	2.28015	yes
Propionylcholine	-0.0858394	0.727659	no			Carnitine-C14	-0.422511	2.05504	yes
Piperidine	-0.0869464	1.02119	no			15-Hete	-0.427093	0.991139	no
Cystine	-0.0871532	0.843574	no			Hexadecanoic Acid (C16:0)	-0.427775	5.44338	yes
D-Myo-inositol 4-monophosohate	-0.0875575	0.611454	no			D-Proline	-0.428603	2.45699	yes
Pyridoxamine	-0.0876128	1.2674	no			Maleic Acid	-0.428961	2.43159	yes
Methionine	-0.0876614	0.382929	no			Glycyl-L-valine	-0.433424	0.425272	no
Dl-Indole-3-lactic acid	-0.0884905	0.66876	no			Dulcitol	-0.433441	0.0486923	no
3-Methylindole	-0.0914514	0.621165	no			Fosfomycin	-0.434689	3.95348	yes
L-serine	-0.0919255	1.48132	yes			L-Pyroglutamic acid	-0.436633	2.25211	yes
Nicotinamide N-oxide	-0.0939367	0.306684	no			γ-Linolenic Acid(C18:3N6)	-0.437061	12.5797	yes
Elaidic Acid (C18:1N9T)	-0.0939474	0.599906	no			Oxypurinol	-0.437635	1.42057	yes
L-Homocitrulline	-0.0944828	0.456669	no			Dl-P-Hydroxyphenyl lactic acid	-0.439374	1.17175	no
Porphobilinogen	-0.0956475	0.662822	no			1,4-Dihydro-1-Methyl-4-Oxo-3-Pyridinecarboxamide	-0.44137	1.4186	yes
Pantetheine	-0.0963652	1.89272	yes			LysoPC 20:2	-0.442713	1.97125	yes
Trimethyllysine	-0.0972239	1.78224	yes			3-Methyladipic acid	-0.444973	7.00831	yes
L-Saccharopine	-0.100208	1.32215	yes			L-Canavanine	-0.455525	1.60019	yes
DL-Leucine	-0.101844	1.26166	no			Ethyl myristate	-0.460387	4.78695	yes
Lysinamide	-0.102133	0.721311	no			Erythronolactone	-0.467218	1.59387	yes
trans-3-Hydroxy-L-proline	-0.102668	1.39811	yes			Cholesterol	-0.469344	7.62425	yes
5-Methoxyindole-3-acetic acid	-0.104347	0.575856	no			Palmitoleic Acid (C16:1)	-0.470858	1.00416	no
L-Cysteinesulfinic acid	-0.104741	0.320374	no			Pimelic acid	-0.472187	8.14263	yes
L-Leucine	-0.104863	1.44367	yes			L-cysteine	-0.47308	1.95391	yes
5-Aminolevulinate	-0.105082	1.53127	yes			5-Methoxytryptophol	-0.473214	0.887972	no
Estriol	-0.106272	1.25177	no			12(S)-HETE	-0.475659	1.22764	no
Phosphoethanolamine	-0.106867	1.15052	no			L-Histidine	-0.479682	4.99635	yes
Aminomalonic acid	-0.106875	0.885087	no			Indolelactic acid	-0.480995	1.03071	no
isoleucine	-0.107521	1.34449	yes			D-Xylonic Acid Lithium Salt	-0.482908	1.89602	yes
All-Trans-13,14-Dihydroretinol	-0.110156	0.997891	no			Diflunisal	-0.484157	33.5469	yes
L-Thyroxine	-0.111429	1.55682	yes			CMPF	-0.493149	0.70581	no
N6-Succinyl Adenosine	-0.112064	0.508598	no			5-Hydroxyhexanoic Acid	-0.498594	0.49055	no
Hydrocortisone acetate	-0.112294	0.982612	no			Asp-Phe	-0.499604	0.394527	no
L-aspartic Acid	-0.115358	2.65308	yes			8(R)-Hydroxy-(5Z,9E,11Z,14Z)-eicosatetraenoic acid	-0.501035	1.3179	yes
Dl-Dihydrosphingosine	-0.116015	1.216	no			5-Aminopentanoate	-0.503198	2.49797	yes
Allo-Isoleucine	-0.116928	1.72656	yes			Linoleic Acid (C18:2N6C)	-0.512289	1.51828	yes
1,3 bisphopshoglycerate	-0.116947	0.848787	no			L-Gulono-1,4-lactone	-0.512894	0.186014	no
L-Threonine	-0.117888	1.31645	yes			Traumatic acid	-0.515476	10.2255	yes
Taurine	-0.118674	1.59206	yes			13-HOTrE(r)	-0.522244	16.9382	yes
1,3-diphopshateglycerate	-0.119553	0.889174	no			N-Acetyl-L-methionine	-0.523024	1.70683	yes
6-Aminohexanoate	-0.120803	1.7067	yes			Methylmalonate	-0.528824	2.46185	yes
Pyridoxine	-0.121744	1.99927	yes			D-Glucose 6-phosphate	-0.533282	2.26538	yes
Dehydrocholic acid	-0.123362	3.028	yes			L-Cysteinesulfinic acid	-0.533862	2.74706	yes
Indoxylsulfuric acid	-0.123702	0.227526	no			hydroxyphenylpyruvate	-0.538371	1.61454	yes
Tryptamine	-0.124451	0.9513	no			N-Oleoyl Glycine	-0.54111	2.44759	yes
Punicic Acid	-0.124531	1.40617	yes			Indoleacetaldehyde	-0.541174	1.38294	yes
Sphinganine	-0.13115	1.51859	yes			Sorbitol	-0.544704	0.420611	no
Etiocholanolone	-0.133454	1.66926	yes			Linolelaidic Acid (C18:2N6T)	-0.545871	1.65907	yes
Gamma-Glu-Leu	-0.138849	0.397529	no			Hydroxyglutaric acid	-0.54998	1.90169	yes
Alpha-Linolenic acid	-0.140776	1.35159	yes			Deoxycholic acid	-0.550527	0.700109	no
carbamaoyl asparatate	-0.141862	1.55843	yes			Hypoxanthine-9-beta-D-Arabinofuranoside	-0.552165	0.491066	no
scyllo-Inositol	-0.142266	0.937382	no			1-Oleoyl-Sn-Glycero-3-Phosphocholine	-0.556087	2.69383	yes
2-Piperidinone	-0.142873	1.09914	no			Lysopc 18:1	-0.556179	2.72925	yes
Allo-Threonine	-0.144066	2.22915	yes			Lysope 14:0	-0.559716	3.06496	yes
13-Hpotre(R)	-0.144104	0.132266	no			Undecanedioic acid	-0.559838	23.8948	yes
N-Acetyl-L-glutamic acid	-0.148454	1.85233	yes			Tiglic acid	-0.561678	1.67138	yes
3-(3-Hydroxyphenyl)propionic Acid	-0.151986	0.653698	no			20-Carboxy-Leukotriene B4	-0.561866	2.14829	yes
12(S)-HETE	-0.154837	0.57836	no			Hydroxypyruvic acid	-0.573917	0.60375	no
Oxindole	-0.156981	0.544236	no			Monobutyl phthalate	-0.576276	3.58004	yes
Hydrocortisone 17-butyrate	-0.164259	0.38137	no			Lysopc 20:4	-0.576789	3.10199	yes
4-Hydroxy-6-methyl-2-pyrone	-0.166197	3.78133	yes			D-Glyceraldehyde 3-phosphate	-0.595427	9.3035	yes
Glycohyocholic acid Sodium salt	-0.167209	0.281913	no			Homoarginine	-0.599194	2.21463	yes
Ureidosuccinic acid	-0.168548	2.56749	yes			Hydroxyphenyllactic acid	-0.609404	2.10588	yes
Glycine	-0.16877	4.0311	yes			Butylmalonic acid	-0.611185	4.774	yes
Methyl 3-Hydroxyphenylacetate	-0.17321	0.180505	no			2-Hydroxybutyric acid	-0.611568	2.0945	yes
Lysine Butyrate	-0.174306	2.75839	yes			Carnitine-C16	-0.616105	3.45133	yes
Dl-3-Hydroxynorvaline	-0.176559	3.88098	yes			Indole-3-acetamide	-0.620662	2.49234	yes
15-Hete	-0.177737	1.10345	no			Lysopc 15:0	-0.624207	2.69439	yes
L-SelenoMethionine	-0.179556	5.32721	yes			Allopurinol	-0.627137	0.103526	no
Asaraldehyde	-0.180546	1.0426	no			(S)-2-Hydroxybutanoicacid	-0.634396	2.27449	yes
D-Glucarate	-0.18498	2.104	yes			N-Carbamyl-L-glutamicacid	-0.642111	0.00366566	no
Carnitine-C8	-0.185852	1.53001	yes			L-arginine	-0.649591	2.59626	yes
8(R)-Hydroxy-(5Z,9E,11Z,14Z)-eicosatetraenoic acid	-0.189481	1.10143	no			Sodium cholate	-0.651742	0.414888	no
Homoserine	-0.189935	2.19103	yes			Tropolone	-0.652454	0.36843	no
L-arginino-succinate	-0.191286	1.30023	no			Carnitine-C18	-0.670853	3.56013	yes
Levodopa	-0.1974	1.83813	yes			Ethyl chrysanthemumate	-0.700418	2.78387	yes
Diflunisal	-0.204847	2.93031	yes			Chenodeoxycholic acid	-0.706334	3.37302	yes
Glu-Glu	-0.217639	5.5696	yes			10-Undecenoic acid	-0.715513	3.68825	yes
N-Acetyl-L-methionine	-0.223479	0.16836	no			DL-3,4-Dihydroxyphenyl glycol	-0.724347	9.21498	yes
Meclocycline	-0.233927	1.42071	yes			N-Acetylalanine	-0.727664	5.50225	yes
N-Methyl-L-arginine hydrochloride	-0.234224	3.577	yes			4-Hydroxyisoleucine	-0.729463	5.11352	yes
Enterodiol	-0.237974	3.46934	yes			D-Glucuronic acid	-0.735503	0.342099	no
Taurocholic acid	-0.238705	0.359909	no			3beta-Ursodeoxycholic acid	-0.74083	4.05732	yes
5-Hydroxyindole-3-acetic acid	-0.252069	1.22527	no			Lysopc 16:2 (2N Isomer)	-0.742759	3.00562	yes
Glycerol-3-phosphate	-0.253516	4.01955	yes			1-Palmitoyl-Sn-Glycero-3-Phosphocholine	-0.745441	3.51613	yes
Nε-(1-Carboxymethyl)-L-lysine	-0.258654	4.53701	yes			Lysopc 18:3	-0.746345	3.73357	yes
L-Citrulline	-0.261598	4.33236	yes			Cholic acid	-0.748744	0.512711	no
Lysope 14:0	-0.261752	4.23594	yes			P–Hydroxyphenyl Acetic Acid	-0.750161	5.81481	yes
DL-Citrulline	-0.264456	4.236	yes			lithocholic acid	-0.750823	3.5381	yes
N-gamma-Acetyl-N-2-Formyl-5-Methoxykynurenamine	-0.271344	1.66491	yes			Allolithocholic acid	-0.758838	3.5449	yes
Ethyl chrysanthemumate	-0.273265	6.21569	yes			farensyl diphosphate	-0.759052	2.67872	yes
Dl-Threitol	-0.28735	2.52621	yes			Lysopc 16:0	-0.761038	3.50093	yes
LysoPE 18:2	-0.293897	3.10086	yes			2-Hydroxy-3-methylbutanoic acid	-0.761659	2.08901	yes
Fexofenadine	-0.295346	4.29604	yes			L-Glutamic acid monosodium salt	-0.764009	5.88863	yes
Serotonin	-0.299758	2.04894	yes			Alloxan	-0.764763	6.5163	yes
Adrenochrome	-0.303531	0.555406	no			D-Mannose 6-phosphate	-0.7827	4.29109	yes
L-arginine	-0.307776	6.94739	yes			Lysopc 16:1	-0.784277	3.25211	yes
D-Proline	-0.308043	6.94206	yes			N-Methylhydantoin	-0.784554	0.227578	no
5-Hydroxylysine	-0.308391	2.83257	yes			L-Malate	-0.79219	5.68323	yes
Maleic Acid	-0.31396	7.04199	yes			Imatinib	-0.797679	3.36941	yes
Taurohyocholic acid sodium salt	-0.319414	0.0390721	no			Taurine	-0.800678	3.36854	yes
N-Acetyl-L-histidine	-0.319534	3.20065	yes			Indoxylsulfuric acid	-0.803657	1.39185	yes
Indole-3-acetamide	-0.320682	7.27402	yes			13-Hpotre(R)	-0.804596	2.37314	yes
L-Canavanine	-0.324148	2.6007	yes			O-Aceyl-L-Serine	-0.80714	6.19756	yes
Tauroursodeoxycholic acid Dihydrate	-0.331218	1.4966	yes			L-Asparagine	-0.807852	6.25038	yes
Taurodeoxycholic acid sodium salt	-0.337301	0.497762	no			Guanidineacetic acid	-0.813511	2.20914	yes
Tauro-alpha-Muricholic acid sodium salt	-0.342642	0.0951029	no			Elaidic Acid (C18:1N9T)	-0.815503	5.29621	yes
Uridine	-0.344066	6.99232	yes			acetoacetate	-0.817853	1.57832	yes
D-Xylulose 5-phosphate	-0.349041	5.53996	yes			L-Threonine	-0.818421	6.21854	yes
Hippuric acid	-0.359036	0.88145	no			S-Sulfo-L-cysteine	-0.823284	3.99577	yes
4-Aminobenzoate	-0.362374	0.191078	no			DL-Serine	-0.829142	4.57786	yes
Lysopc 18:3	-0.370638	13.3531	yes			1,5-Anhydro-D-Glucitol	-0.831172	5.47774	yes
Styrene	-0.381506	11.1019	yes			Gly-Phe	-0.834939	1.98309	yes
Allantoin	-0.395266	8.21309	yes			1-Stearoyl-Sn-Glycerol-3-Phosphocholine	-0.84281	3.68937	yes
1-Palmitoyl-Sn-Glycero-3-Phosphocholine	-0.420477	15.2546	yes			L(+)-Asparagine monohydrate	-0.843006	6.78609	yes
5-Aminopentanoate	-0.43527	5.67689	yes			PAF C-16	-0.843837	3.73127	yes
Taurohyodeoxycholic acid sodium salt	-0.439567	0.373712	no			Glyceraldehyde 3-phosphate diethyl acetal	-0.844952	3.66007	yes
Glyceraldehyde 3-phosphate diethyl acetal	-0.450662	5.24645	yes			D-Galactonic acid	-0.845923	0.396285	no
Lysopc 15:0	-0.451854	9.46193	yes			LysoPC 18:0	-0.846191	3.74133	yes
Lysopc 16:0	-0.465041	15.3397	yes			3-Methyl-2-oxobutanoic acid	-0.850038	4.71918	yes
L-Cystathionine	-0.466356	1.10961	no			9,10-Dihome	-0.854705	9.62307	yes
Lysopc 20:4	-0.469608	12.8069	yes			Inosine	-0.877085	0.31034	no
L-Hydroxyproline	-0.47069	7.16475	yes			4-Hydroxy-2-Oxoglutaric Acid	-0.892933	10.2335	yes
Lysopa 16:0	-0.47778	8.93074	yes			Lysopc 17:0	-0.90409	3.91531	yes
Cholesterol	-0.479928	3.97973	yes			4-Hydroxyphenylpyruvic Acid	-0.909956	3.79789	yes
Inosine 5'-Monophosphate	-0.512409	6.85148	yes			Carbamoylphosphate	-0.920871	2.65536	yes
Lysopc 18:1	-0.513511	13.9841	yes			Isocitrate	-0.927815	2.92826	yes
1-Oleoyl-Sn-Glycero-3-Phosphocholine	-0.522998	14.0318	yes			PE(18:1(9Z)/0:0)	-0.928297	4.29112	yes
Lysopc 18:2	-0.524335	7.47182	yes			Lysope 18:1	-0.93002	4.43318	yes
Trigonelline	-0.535299	5.32093	yes			Aminomalonic acid	-0.932962	8.2207	yes
11-Cis-Retinol	-0.540645	8.21323	yes			Lysopc 14:0	-0.964578	3.52043	yes
p-cresol	-0.543228	0.482	no			Succinic acid	-0.974102	6.15299	yes
2-Furoylglycine	-0.553413	3.34589	yes			Lysopc 20:0	-1.01666	3.82683	yes
PAF C-16	-0.564906	14.0511	yes			D-Gluconic acid	-1.03146	0.0818548	no
Hypoxanthine-9-beta-D-Arabinofuranoside	-0.569721	1.0793	no			DL-o-Tyrosine	-1.0319	8.90126	yes
Lysopc 17:0	-0.571116	13.651	yes			(S)-Leucic acid	-1.03213	5.83709	yes
LysoPC 18:0	-0.572617	14.2027	yes			N-Acetylneuraminic acid	-1.04381	0.312498	no
3-N-Methyl-L-histidine	-0.580155	4.80258	yes			L-Fucose	-1.05898	4.45096	yes
Inosine	-0.582247	2.25537	yes			Ethylmalonate	-1.06421	5.34539	yes
H-Gly-Pro-OH	-0.5829	10.2552	yes			cis-4-Hydroxy-D-proline	-1.08473	7.97882	yes
Allopurinol	-0.583621	1.31112	yes			1,3-Dimethyluric Acid	-1.08762	14.2249	yes
Lysopa 18:0	-0.585722	9.9838	yes			13-HPODE	-1.09002	17.5968	yes
1-Stearoyl-Sn-Glycerol-3-Phosphocholine	-0.588093	14.2377	yes			Palmitaldehyde	-1.10643	19.7344	yes
Lysopg 18:1	-0.589313	10.514	yes			Calcium D-Panthotenate	-1.10866	5.00142	yes
Hypoxanthine	-0.596848	7.67214	yes			L-Rhamnose monohydrate	-1.12585	5.02158	yes
Spermidine	-0.597691	6.48391	yes			Inosine 5'-Monophosphate	-1.13015	3.11009	yes
5-Methoxyindole-3-Carbaldehyde	-0.628236	13.5271	yes			Citric acid	-1.15311	4.54623	yes
Isobutyrylglycine	-0.632113	8.0416	yes			2-Phenylbutyric acid	-1.15824	6.28533	yes
LysoPC 20:2	-0.64008	16.0474	yes			Gamma-Glu-Leu	-1.21091	7.48149	yes
Glycocholic acid hydrate	-0.641209	0.0577357	no			LysoPE 18:0	-1.24053	6.82032	yes
Lysopc 14:0	-0.662169	16.2596	yes			Xanthurenic Acid	-1.30294	7.50763	yes
Choline Glycerophosphate	-0.669693	13.5253	yes			Lysope 16:0	-1.31339	6.83895	yes
p-Mentha-1,3,8-triene	-0.702044	19.592	yes			12,13-EODE	-1.33214	10.0092	yes
Lysopc 20:0	-0.712585	11.0024	yes			2,6-Dihydroxypurine	-1.33436	3.5659	yes
Lysopc 16:1	-0.722264	22.3755	yes			Lysopg 18:1	-1.37143	5.37945	yes
Imatinib	-0.725187	22.5649	yes			3-Indoleacrylic acid	-1.3971	3.68404	yes
Asp-Phe	-0.759866	4.39988	yes			Phe-Phe	-1.40112	2.3269	yes
Lysopc 16:2 (2N Isomer)	-0.90744	17.8901	yes			Lysopa 18:0	-1.41861	5.3553	yes
Glycyl-L-valine	-1.14413	16.4158	yes			N-Acetyl-D-glucosamine 6-phosphate	-1.49555	14.6329	yes
Methyl Benzoate	-1.20516	5.51465	yes			Lysopa 16:0	-1.49641	5.98335	yes
Gly-Phe	-1.25916	24.3633	yes			4-Pyridoxic acid	-1.58346	1.21589	no
2-Hydroxy-2-methylbutanoic acid	-1.2668	46.6987	yes			Methyl Benzoate	-1.60281	5.13501	yes
Phe-Phe	-2.3198	27.9833	yes			Taurolithocholic acid sodium salt	-3.83071	14.3285	yes

## Sheet: Fig 3B
GCDCA					TCDCA					CDCA					TDCA
Non-SF	SF-S	SF-D			Non-SF	SF-S	SF-D			Non-SF	SF-S	SF-D			Non-SF	SF-S	SF-D
2584000	7983000	743500			475800	1216000	93850			208253	158058	163687			172100	103885	10860
821500	11560000	2370000			148100	4532000	1073000			164570	173355	270586			31420	1647000	144700
633400	6677000	699900			89070	1086000	47660			132642	117800	184650			19210	1263000	79861
1549000	7563000	3185000			400000	3113000	647800			46890	314127	220443			126400	573300	40830
4046000	22550000	717300			1026000	5132000	74460			168784	242225	609000			698400	703500	194669
5865000	2813000	4916000			2193000	288200	3474000			28020	243963	191612			158223	81476	168224
1213000	12660000	952200			189600	5897000	86010			187585	196020	186442			64090	1362000	74730
39410	7344000	3000000			16720	1764000	1110000			153655	213946	540600			6711	458600	421700
299500	4062000	1026000			54870	804100	218500			73310	134600	180741			119903	1227000	114600
699000	5882000	2151000			98750	1076000	414200			56210	123700	196300			48780	1109000	386300
1221000	3704000	4024000			113800	254900	633600			210911	2068000	667400			67010	553300	432900
1429000	15020000	6423000			95110	2428000	1909000			218295	136425	241762			39840	1236000	419800
2776000	3644000	778900			1056000	299200	90670			178574	178850	614500			356600	70910	20550
4354000	1325000	5414000			997800	382200	1383000			57410	254700	203934			407200	162900	587200
2828000	49450000	988900			532000	6033000	89320			212491	261943	250275			394900	793400	26550
1953000	7714000	393900			194500	2009000	42390			233418	250928	842000			79587	258902	26960
4634000	26590000	3654000			1453000	9689000	669700			217112	154885	196817			378700	286020	508700
725200	8162000	372100			72060	6198000	38840			214147	139838	153608			74982	1331000	27450
1157000	7879000	158800			149200	1111000	13500			188900	164200	214500			156000	508500	71849
13660000	22660000	146100			1588000	1615000	29900			289300	119100	204202			800400	148212	67685
1044000	1378000	598400			196600	151600	91420			86810	131300	445400			280200	51210	49930
1713000	3744000				332300	635500				234274	119400				115100	47500
1027000	2244000				141400	444300				106800	533800				95542	172400
4456000	9369000				482600	1604000				69010	222606				450100	366300
4913000	7891000				1828000	1159000				95190	606300				761700	439700
2204000	2060000				191500	446800				210600	375800				86690	550200
629600	1650000				149100	215500				260050	228776				107000	60290
873600	3267000				104500	445100				228277	209500				75252	296400
1726000	18730000				211000	6675000				459000	179011				742600	388800
1381000	1915000				211500	514000				243800	232082				352900	170900
1958000	2995000				195000	354500				204231	241210				78022	64530
1280000	1832000				437400	521100				68470	310236				355600	283600
795400	4089000				126800	1028000				233454	1154000				69728	530500
1142000	2181000				94140	280300				267556	504100				37200	176200
2538000	11730000				216100	2781000				111800	259033				257200	214639
512300	7333000				140500	1029000				218676	246300				44950	547100
961200	3972000				143600	373200				238718	508500				79497	200300
1562000	1504000				109200	211500				315914	612500				68940	125500
2611000	12660000				367500	2273000				69470	2115000				148800	1105000
1335000	13630000				35410	1786000				253415	258545				29050	442700
1323000	1253000				290800	545600				264691	295587				73360	148114
564900	4149000				52820	437300				224900	344137				64900	173800
4733000	2728000				528100	356200				174100	239477				281400	243100
3826000	4576000				724300	1436000				111100	337600				317600	436400
2104000	911200				642100	161800				335428	229900				153200	225200
1101000	5051000				262400	796100				253740	413300				73700	1786000
12270000	8645000				2293000	814100				271100	345325				477500	838100
6584000	6385000				810100	1222000				253800	311117				688400	247300
1171000	4574000				95320	1423000				136300	283087				64720	761600
4559000	9063000				2453000	902500				301500	1181000				384900	1192000
1853000	3130000				90760	346700				294600	273240				149014	94520
3829000	1073000				833900	193000				94380	324437				111900	125122
1622000	7131000				413800	1142000				375300	320900				140200	567200
345800	18710000				39150	7279000				78940	455150				4391	2654000
7485000	4592000				907000	861400				519800	401637				273700	437800
2086000	11300000				412800	3721000				171600	638875				85100	406900
921800	13930000				196800	2095000				164300	285265				17930	549200
2936000	6676000				216800	1442000				113100	330437				49830	260700
2335000	1577000				216500	356900				424700	590100				96590	155300
3560000	10580000				274900	2381000				572500	348187				199700	114800
512100	2477000				40970	375900				266513	295090				7711	90180
3266000	844600				165000	137900				389500	335012				38050	79993
2549000	2409000				674900	346100				236500	271748				163200	108900
4084000	6853000				835100	1205000				194100	181000				262800	418900
1724000	238600				282000	30520				111900	353200				255900	103803
2362000	5602000				1581000	1164000				392170	174900				388500	107900
12280000	1710000				1358000	707400				299500	622600				190563	199500
2439000	7490000				399300	1973000				486400	303725				68060	184659
1201000	3033000				60350	408000				243053	1115000				96397	172000
6335000	1826000				1176000	208000				483300	323187				234900	33190
967200	3078000				57810	589700				67790	425000				101068	140300
7345000	4571000				2133000	329600				297600	105500				920000	143700
2893000	1449000				762100	272700				182600	333625				120200	25690
2371000	8014000				361900	1091000				127200	424575				136400	366100
1387000	5586000				196200	309000				124500	324600				21220	94290
11030000	1003000				2226000	74340				141900	194600				443200	58620
728400	2247000				235200	219400				75620	116500				23530	80202
2740000	1674000				275200	135000				175700	648500				91390	107900
2494000	11590000				132000	1195000				981400	697500				59210	843600
3901000	602900				737000	61190				572500	35950				110300	77537
1782000	7228000				762500	2167000				66080	399115				194600	612500
1376000	1345000				269200	193300				171100	267300				106014	5946
5864000	4694000				1674000	316900				103000	408093				638300	100026
3318000	5802000				1010000	1064000				45780	576000				516400	403000
560400	601700				90980	124600				242074	274180				30160	99280
7100000	639600				968700	228000				138100	188700				79800	63120
1409000	507500				145500	72700				124900	317433				92660	59787
3940000	1612000				903200	211700				333637	217100				296900	161100
12260000	5088000				1718000	1469000				179900	63100				279600	571200
545200	5757000				37900	1470000				101700	268837				97100	98200
2399000	9901000				335600	1986000				450600	381934				185207	569300
4103000	23980000				604100	6403000				67810	375600				192300	997200
5264000	853100				490100	255400				56510	613600				145700	320200
2025000	7950000				601500	895500				552600	803500				344000	1216000
1196000	5186000				135100	775700				143500	102000				131500	404600
2633000	2029000				720700	267400				365000	387125				420800	45390
3406000	13800000				495600	1139000				309000	75110				78510	121500
4720000	659300				823100	37800				26840	366100				110287	169981
3713000	5290000				537300	1911000				243838	83140				325700	484100
1583000	607800				207000	214200				344900	270716				40940	79080
15900000	13240000				1776000	1894000				255681	280125				317400	157450
2371000	5547000				203000	1474000				235126	134800				105392	762500
3419000	24810000				476400	4506000				124600	402116				65890	1284000
3680000	1835000				631900	426700				211200	837100				211400	559900
2197000	49620000				126300	11470000				123500	348700				61760	3260000
448300	6357000				71390	1200000				183268	267270				90442	347900
264100	2666000				28090	166000				188095	749900				19580	199000
1617000	4179000				391000	1728000				193802	550300				158200	868600
1310000	3934000				268200	752600				324080	744900				35290	152300
1544000	1773000				126300	251200				153966	342633				94445	98050
295700	5431000				189200	493300				352595	327000				230656	109700
2171000	3758000				318600	500000				590400	549800				219000	368600
9382000	757300				1731000	55000				227146	144400				78630	52910
4025000	17380000				1115000	4031000				220462	271100				207500	716200
477100	31110000				39120	4831000				215911	192600				88947	1538000
12250000	27140000				2306000	6166000				259618	269240				219873	123400
1001000	10150000				109000	1682000				263621	309400				115300	259685
98240	1544000				6559	158200				169250	249200				72684	96990
564800	11880000				57950	2324000				248313	248500				98745	679300
470100	926400				75440	74980				190830	586600				61559	203890
1179000	2449000				177000	653700				186917	909400				26030	594600
847100	1464000				57810	230100				251198	569700				46580	73820
772000	1821000				130600	290200				195987	290955				78381	98000
3500000	9595000				585300	2405000				449200	350514				292700	144970
795400	4292000				410900	395300				177838	190500				75550	39540
2442000	2635000				700200	274200				292100	571900				153500	319800
71460	1660000				8559	321100				215647	793000				87318	410000
4373000	2678000				938900	686400				164000	489275				203600	34280
878000	15040000				272700	2682000				263900	685800				176100	957900
714400	414300				78870	63880				206400	307150				36300	12420
150000	4613000				37220	500800				140200	102200				20410	78780
6941000	1417000				2009000	169900				187646	328655				143796	29710
	15480000					1745000					182400					124700
	8068000					1638000					286100					1076000
	1032000					98060					351200					47550
	28420000					12550000					378113					3889000
	2923000					689700					533100					216000
	2937000					251100					370488					31990
	2095000					304500					317550					81888
	2946000					411500					339912					138500
	9680000					1324000					135400					334500
	7981000					906100					951100					570500
	2996000					413500					320204					73950
	21980000					4266000					318940					269928
	1904000					257000					800000					311600
	5955000					1265000					286705					405800
	4510000					514700					236103					145040
	4454000					635100					317173					168000
	3914000					702300					480000					437600
	6121000					1165000					301400					401800
	4271000					409000					299181					34330
	3913000					1006000					341187					226853
	4243000					704100					285338					1011000
	8582000					2218000					838800					994700
	10480000					3939000					547197					413300
	7778000					1522000					659800					1258000
	257500					69200					188973					25140
	1151000					180000					297300					312200
	981100					911800					168998					152700
	2227000					346200					612400					447900
	680000					79950					244600					113100
	3364000					837800					160300					777000
	417400					82710					156840					26170
	984800					173400					215398					50340
	3909000					3124000					292588					646200
	1285000					355100					127900					220900
	4564000					1371000					201186					74050
	718700					29710					154700					9681
	52340					4569					219122					114635
	1548000					682100					300262					75310
	2580000					360000					168800					295500
	426900					44080					159317					69967
	916600					449400					215155					25120
	664600					239100					250668					100501
	808800					188400					239637					86643
	151800					21140					270500					93105
	8772000					2124000					144000					836500
	3556000					92340					245465					10330
	476900					56420					226960					47940
	3970000					541000					272600					120030
	444100					26140					680600					262877
	661000					101700					224500					30820
	2530000					191400					324600					92460
	543900					163100					227175					102042
	1718000					152200					149900					75170
	1655000					292100					255446					145000
	1288000					141900					260262					120242
	5001000					290700					304450					98864
	14160000					2865000					221084					1047000
	5544000					1337000					273887					235000
	1260000					101000					218300					85110
	7592000					3664000					256212					477700
	308400					43340					239800					152928
	797500					129300					1156000					228900
	4887000					1129000					263480					74650
	5339000					1912000					333675					219500
	745700					150100					233746					57460
	1042000					102300					111100					108000
	13610000					1329000					133900					777800
	1270000					613200					295737					71530
	1255000					201600					123600					41430
	1314000					370500					294820					263100
	20460000					3197000					268275					309600
	358400					56310					947900					136400
	18980000					2974000					1108000					304100
	1448000					474800					265062					50250
	1931000					328700					449650					54360
	44820000					21710000					917700					2712000
	6411000					2256000					311291					67760
	13570000					1527000					852300					850200
	2148000					527500					250937					112000
	4294000					866500					357771					226006
	4960000					945200					279844					105800
	1087000					271200					241300					99950
	80120000					83700000					408237					948200
	2961000					572200					277948					106200
	12880000					5973000					149400					1887000
	27460000					2756000					426212					285729
	989000					49410					255500					109495
	20830000					1504000					386762					70810
	1613000					1070000					378900					127100
	4962000					2080000					359212					335800

## Sheet: Fig 3C
<6	6~7	≥7
9.14014e-05	0.00212508	0.22535
9.14014e-05	0.00427302	0.0839979
0.000525558	0.00402166	0.00150812
2.28504e-05	0.000708361	0.0363321
4.57007e-05	0.00936865	0.0603706
4.57007e-05	0.00319905	0.00191943
0.012065	0.0197199	0.0451751
0.000548408	0.00566689	0.00525558
0.00541553	0.00815758	0.0923383
0.0127505	0.000731211	0.00121107
0.000114252	0.00123392	0.00239929
6.85511e-05	0.00063981	0.0124534
9.14014e-05	0.00148527	0.00207938
0.00904874	0.0122706	0.00134817
0.000319905	0.00100542	0.360807
0.000936864	0.000799762	0.441766
2.28504e-05	4.57007e-05	0.359093
0.0389827	0.0350296	0.00338185
0.00159953	0.00194228	0.00776912
0.00171378	0.0064895	0.12097
0.00191943	0.000228504	0.118136
0.00223933	0.00118822	0.0144414
0.000228504	0.00271919	0.00395311
0.0430729	0.000685511	0.00319905
0.000822613	0.000594109	0.665951
0.000297055	0.00100542	0.00274204
0.00895734	0.00111967	0.250006
0.000685511	0.000274204	0.00685511
	0.000137102	0.0112195
	0.000548408	0.194708
	0.025958	0.144163
	0.000457007	0.000182803
	4.57007e-05	0.000434157
	0	0.254964
	9.14014e-05	0.000319905
	0.0100313	0.00230789
	0.000457007	0.00141672
	0.0123163	0.247858
	0.000297055
	0.000936864
	0.00066266
	0.000342755
	0.00153097
	0.0163837
	0.000754062
	0.00118822
	0.0266207
	0.00276489
	0.000182803
	0.00402166
	0.000388456
	0.00962
	0.00198798
	0.00148527
	0.00066266
	0.0029477
	0.00566689
	0.000114252
	0.0858716
	0.0405137
	0.00482142
	0.00425017
	0.00859173
	6.85511e-05
	0.000297055
	0.0372232
	0.000548408
	0.000731211
	0.000411306
	0.000525558
	0.00491283
	0.000274204
	0.000502708
	0.0324247
	6.85511e-05
	0.0523273
	0.000365606
	0.000388456
	6.85511e-05
	0.000708361
	0.000137102
	0.000754062
	0.000388456
	0.00150812
	0.0170007
	0.00226218
	0.00105112
	0.025341
	0.0704248
	0.00114252
	0.00765487
	0.000776912
	0.000708361
	0.000228504
	0.00127962
	0.00173663
	0.0101456
	0.0676142
	0.00347325
	0.00111967
	0.00274204
	0.000822613
	0.0033133
	0.0115394
	0.000548408
	0.00226218
	0.00221648
	0.0471174
	0.000114252
	0.0599136
	0.000228504
	0.0791765
	0.000411306
	0.000457007
	9.14014e-05
	9.14014e-05
	0.0121792
	6.85511e-05
	2.28504e-05
	0.000297055
	0.00162237
	0.00251354
	0.000342755
	0.00255924
	0.00379316
	0.000594109
	0.0488084
	0.000159952
	0.0566917
	0.000457007
	0.000182803

## Sheet: Fig 3D
IL-1β					IL-6
<6	6~7	≥7			<6	6~7	≥7
7.335	8.793	3.987			6.264	8.622	0.954
7.407	8.856	4.437			13.014	9.576	7.488
5.652	4.752	5.292			12.708	5.787	8.622
5.04	12.735	3.915			5.571	21.726	7.515
11.772	6.111	4.689			5.391	9.81	0.954
10.17	4.896	2.664			9.684	7.515	0.954
4.437	6.57	5.832			4.419	4.554	5.391
10.674	4.896	9.279			20.952	4.365	4.869
9.792	6.111	6.039			13.284	5.778	8.496
5.958	12.042	8.028			2.745	26.586	2.277
21.528	8.865	8.64			71.316	17.523	2.007
3.033	5.427	2.826			0.954	10.575	0.81
	4.896	1.872				6.849	0.954
	6.453	4.617				4.167	0.954
	12.789	4.509				17.523	0.954
	4.293	7.182				0.954	3.051
	6.381	4.68				24.399	2.88
	11.214	2.736				23.193	0.954
	12.456	6.255				14.202	3.294
	7.479	3.825				14.202	3.051
	6.111	4.437				2.367	3.555
	8.028	2.988				4.761	0.954
	5.022					5.094
	5.832					10.287
	8.721					9.216
	8.442					5.211
	5.832					0.954
	5.562					7.236
	2.25					0.954
	9.135					26.388
	7.794					10.053
	7.56					3.15
	4.752					3.555
	7.137					3.663
	6.111					11.943
	7.407					3.6
	7.137					2.943
	9.936					11.511
	5.499					0.954
	3.321					0.954
	6.075					1.179
	10.944					26.586
	4.437					1.035
	5.904					7.236
	9.972					1.026
	15.417					3.141
	11.385					16.605
	5.121					3.15
	5.031					9.531
	3.987					4.077
	4.437					1.251
	8.73					10.998
	4.356					1.656
	3.303					4.653
	4.356					3.978
	3.618					2.634
	3.987					4.194
	5.202					2.367
	7.488					3.978
	3.951					5.364
	5.427					5.562

## Sheet: Fig 3E
IL-1B			IL-6
CDCA	GCDCA		CDCA	GCDCA
2.32	0.64		1.13	0.95
2.35	0.24		1.72	1.68
2.88	0.79		1.74	1.13

## Sheet: Fig 3F
IL-1B							IL-6							Viral load
100μM CDCA	100μM GCDCA	SFTSV	100μM CDCA+SFTSV	100μM GCDCA+SFTSV			100μM CDCA	100μM GCDCA	SFTSV	100μM CDCA+SFTSV	100μM GCDCA+SFTSV			SFTSV	100μM GCDCA+SFTSV
1.77	0.02	21.94	7.78	1.65			1.07	2.13	2.72	1.21	0.69			4.91	5.08021
0.58	0.06	101.6	31.31	15.03			1.69	2.94	3.6	0.49	3.97			5.21	5.09683
0.76	0.11	28.09	32.36	5.07			0.38	1.2	1.88	0.65	0.43			4.99	5.13071
	0.19	79.7		17.89				1.32	2.57		3.05			4.39	4.54448
	0.16	108.04		10.87				2.29	4.37		3.83			5.15	4.26151

## Sheet: Fig 3G
IL-1β						IL-6
MOCK	100μM GCDCA	SFTSV	100μM GCDCA+SFTSV			MOCK	100μM GCDCA	SFTSV	100μM GCDCA+SFTSV
NA	NA	311.08	NA			9.29	5.89	2309.87	99.03
NA	NA	438.65	NA			7.61	4.82	2748.27	125.73
NA	NA	316.95	NA			7.04	3.36	2824.2	86.98
NA	NA	308.56	NA			19.26	8.63	2758.57	102.59
NA	NA	507.47	NA			16.15	5.98	3350.54	95.24

## Sheet: Fig 3H
IL1b				IL6				Viral load
SFTSV	TCDCA+SFTSV	TDCA+SFTSV		SFTSV	TCDCA+SFTSV	TDCA+SFTSV		SFTSV	TCDCA+SFTSV
481.76	260.21	1029.56		13.25	9.5	34.07		6.34999	6.12866
472.13	256.91	987.22		14.72	9.58	27.77		5.76346	6.10836
537.26	247.77	1104.69		15.4	8.04	27.64		5.80638	6.00115
451.06	121.13			11.57	6.32			6.2314	5.63543
501.98	170.29			11.28	9.77			6.22062	5.82624
510.32	210.01			9.53	7.17			6.43342	5.7012
