# Supplementary material
Source: publisher figshare collection journal article supplement (https://springernature.figshare.com/articles/dataset/_/21334422)
Supplement: Supplementary file 5 [file 1 › Source_Data_Figure_4.xlsx]

## Sheet: Fig 4A
MapID	MapTitle	Pvalue	x	y	n	N	EnrichDirect	MetaIDs	kegg_cpd_id
map00410	beta-Alanine metabolism	0.0336989	3	4	35	159	Over	Spermidine, L-Histidine, Uracil	cpd:C00315,cpd:C00135,cpd:C00106
map04977	Vitamin digestion and absorption	0.0424394	4	7	35	159	Over	L-Ascorbate, Nicotinamide, Folic acid, Vitamin A	cpd:C00072,cpd:C00153,cpd:C00504,cpd:C00473
map00480	Glutathione metabolism	0.0424932	5	10	35	159	Over	Pyroglutamic acid, L-Ascorbate, Cys-Gly, Spermidine, glutathione	cpd:C01879,cpd:C00072,cpd:C01419,cpd:C00315,cpd:C00051
map04022	cGMP-PKG signaling pathway	0.0473688	2	2	35	159	Over	Adenosine 5'-monophosphate, Adenosine	cpd:C00020,cpd:C00212
map04971	Gastric acid secretion	0.0473688	2	2	35	159	Over	Acetylcholine, Histamine	cpd:C01996,cpd:C00388
map04979	Cholesterol metabolism	0.0473688	2	2	35	159	Over	Taurocholic acid, Glycochenodeoxycholic acid	cpd:C05122,cpd:C05466
map04976	Bile secretion	0.0608438	7	17	35	159	Over	estrone 3-sulfate, Folic acid, Acetylcholine, Spermidine, glutathione, Taurocholic acid, Glycochenodeoxycholic acid	cpd:C02538,cpd:C00504,cpd:C01996,cpd:C00315,cpd:C00051,cpd:C05122,cpd:C05466
map04924	Renin secretion	0.0713805	3	5	35	159	Over	Adenosine 5'-monophosphate, Adenosine, Adenosine 5'-Diphosphate	cpd:C00020,cpd:C00212,cpd:C00008
map04742	Taste transduction	0.108296	4	9	35	159	Over	Adenosine 5'-monophosphate, Acetylcholine, D-Phenylalanine, Adenosine 5'-Diphosphate	cpd:C00020,cpd:C01996,cpd:C02265,cpd:C00008
map04024	cAMP signaling pathway	0.121133	3	6	35	159	Over	Adenosine 5'-monophosphate, Acetylcholine, Adenosine	cpd:C00020,cpd:C01996,cpd:C00212
map04216	Ferroptosis	0.122194	2	3	35	159	Over	glutathione, Mevalonic acid	cpd:C00051,cpd:C00418
map00970	Aminoacyl-tRNA biosynthesis	0.138611	5	12	35	159	Over	L-Proline, L-Tyrosine, L-Asparagine, Serine, L-Histidine	cpd:C00148,cpd:C00082,cpd:C00152,cpd:C00716;cpd:C00065,cpd:C00135
map04974	Protein digestion and absorption	0.162096	5	13	35	159	Over	L-Proline, Histamine, L-Asparagine, Serine, L-Histidine	cpd:C00148,cpd:C00388,cpd:C00152,cpd:C00716;cpd:C00065,cpd:C00135
map05230	Central carbon metabolism in cancer	0.180154	3	7	35	159	Over	L-Proline, L-Asparagine, L-Histidine	cpd:C00148,cpd:C00152,cpd:C00135
map01523	Antifolate resistance	0.210688	2	4	35	159	Over	Folic acid, Adenosine 5'-monophosphate	cpd:C00504,cpd:C00020
map04068	FoxO signaling pathway	0.210688	2	4	35	159	Over	Adenosine 5'-monophosphate, Adenosine 5'-Diphosphate	cpd:C00020,cpd:C00008
map04071	Sphingolipid signaling pathway	0.210688	2	4	35	159	Over	Adenosine, Serine	cpd:C00212,cpd:C00716;cpd:C00065
map04152	AMPK signaling pathway	0.210688	2	4	35	159	Over	Adenosine 5'-monophosphate, Adenosine 5'-Diphosphate	cpd:C00020,cpd:C00008
map04721	Synaptic vesicle cycle	0.210688	2	4	35	159	Over	Acetylcholine, Histamine	cpd:C01996,cpd:C00388
map04923	Regulation of lipolysis in adipocytes	0.210688	2	4	35	159	Over	Adenosine 5'-monophosphate, Adenosine	cpd:C00020,cpd:C00212
map05012	Parkinson's disease	0.210688	2	4	35	159	Over	Adenosine, Adenosine 5'-Diphosphate	cpd:C00212,cpd:C00008
map00072	Synthesis and degradation of ketone bodies	0.220126	1	1	35	159	Over	acetoacetate	cpd:C00164
map00280	Valine, leucine and isoleucine degradation	0.220126	1	1	35	159	Over	acetoacetate	cpd:C00164
map00670	One carbon pool by folate	0.220126	1	1	35	159	Over	Folic acid	cpd:C00504
map00830	Retinol metabolism	0.220126	1	1	35	159	Over	Vitamin A	cpd:C00473
map04150	mTOR signaling pathway	0.220126	1	1	35	159	Over	Adenosine 5'-monophosphate	cpd:C00020
map04151	PI3K-Akt signaling pathway	0.220126	1	1	35	159	Over	Adenosine 5'-monophosphate	cpd:C00020
map04211	Longevity regulating pathway	0.220126	1	1	35	159	Over	Adenosine 5'-monophosphate	cpd:C00020
map04611	Platelet activation	0.220126	1	1	35	159	Over	Adenosine 5'-Diphosphate	cpd:C00008
map04740	Olfactory transduction	0.220126	1	1	35	159	Over	Adenosine 5'-monophosphate	cpd:C00020
map04810	Regulation of actin cytoskeleton	0.220126	1	1	35	159	Over	Acetylcholine	cpd:C01996
map04972	Pancreatic secretion	0.220126	1	1	35	159	Over	Acetylcholine	cpd:C01996
map05032	Morphine addiction	0.220126	1	1	35	159	Over	Adenosine	cpd:C00212
map05033	Nicotine addiction	0.220126	1	1	35	159	Over	Acetylcholine	cpd:C01996
map00230	Purine metabolism	0.228706	4	10	35	159	Over	Adenosine 5'-monophosphate, Adenine, Adenosine, Adenosine 5'-Diphosphate	cpd:C00020,cpd:C00147,cpd:C00212,cpd:C00008
map04080	Neuroactive ligand-receptor interaction	0.228706	4	10	35	159	Over	Acetylcholine, Adenosine, Histamine, Adenosine 5'-Diphosphate	cpd:C01996,cpd:C00212,cpd:C00388,cpd:C00008
map01100	Metabolic pathways	0.267694	28	113	35	159	Over	L-Ascorbate, Nicotinamide, Folic acid, L-Proline, Adenosine 5'-monophosphate, Adenine, Adenosine, L-Tyrosine, L-Saccharopine, Histamine, Cytidine-5'-monophosphate, Cys-Gly, 5-Aminolevulinate, L-Asparagine, 6-Aminohexanoate, Serine, Spermidine, S-Methyl-5'-thioadenosine, Adenosine 5'-Diphosphate, L-Histidine, L-Hydroxyproline, Uracil, glutathione, Vitamin A, Sarcosine, Taurocholic acid, Mevalonic …	cpd:C00072,cpd:C00153,cpd:C00504,cpd:C00148,cpd:C00020,cpd:C00147,cpd:C00212,cpd:C00082,cpd:C00449,cpd:C00388,cpd:C00055,cpd:C01419,cpd:C00430,cpd:C00152,cpd:C02378,cpd:C00716;cpd:C00065,cpd:C00315,cpd:C00170,cpd:C00008,cpd:C00135,cpd:C01157,cpd:C00106,cpd:C00051,cpd:C00473,cpd:C00213,cpd:C05122,cpd:C00418,cpd:C00164
map00330	Arginine and proline metabolism	0.300457	4	12	35	159	Over	L-Proline, Spermidine, L-Hydroxyproline, Sarcosine	cpd:C00148,cpd:C00315,cpd:C01157,cpd:C00213
map00270	Cysteine and methionine metabolism	0.375344	3	8	35	159	Over	Serine, S-Methyl-5'-thioadenosine, glutathione	cpd:C00716;cpd:C00065,cpd:C00170,cpd:C00051
map00130	Ubiquinone and other terpenoid-quinone biosynthesis	0.392883	1	2	35	159	Over	L-Tyrosine	cpd:C00082
map00640	Propanoate metabolism	0.392883	1	2	35	159	Over	acetoacetate	cpd:C00164
map00770	Pantothenate and CoA biosynthesis	0.392883	1	2	35	159	Over	Uracil	cpd:C00106
map00790	Folate biosynthesis	0.392883	1	2	35	159	Over	Folic acid	cpd:C00504
map00900	Terpenoid backbone biosynthesis	0.392883	1	2	35	159	Over	Mevalonic acid	cpd:C00418
map00920	Sulfur metabolism	0.392883	1	2	35	159	Over	Serine	cpd:C00716;cpd:C00065
map04142	Lysosome	0.392883	1	2	35	159	Over	Adenosine 5'-Diphosphate	cpd:C00008
map04270	Vascular smooth muscle contraction	0.392883	1	2	35	159	Over	Adenosine	cpd:C00212
map04664	Fc epsilon RI signaling pathway	0.392883	1	2	35	159	Over	Histamine	cpd:C00388
map04725	Cholinergic synapse	0.392883	1	2	35	159	Over	Acetylcholine	cpd:C01996
map04750	Inflammatory mediator regulation of TRP channels	0.392883	1	2	35	159	Over	Histamine	cpd:C00388
map04911	Insulin secretion	0.392883	1	2	35	159	Over	Acetylcholine	cpd:C01996
map04970	Salivary secretion	0.392883	1	2	35	159	Over	Acetylcholine	cpd:C01996
map05034	Alcoholism	0.392883	1	2	35	159	Over	Adenosine	cpd:C00212
map05310	Asthma	0.392883	1	2	35	159	Over	Histamine	cpd:C00388
map00190	Oxidative phosphorylation	0.528227	1	3	35	159	Over	Adenosine 5'-Diphosphate	cpd:C00008
map00590	Arachidonic acid metabolism	0.528227	1	3	35	159	Over	12(S)-HETE	cpd:C14777
map00600	Sphingolipid metabolism	0.528227	1	3	35	159	Over	Serine	cpd:C00716;cpd:C00065
map00650	Butanoate metabolism	0.528227	1	3	35	159	Over	acetoacetate	cpd:C00164
map01040	Biosynthesis of unsaturated fatty acids	0.528227	1	3	35	159	Over	Nervonic acid	cpd:C08323
map04066	HIF-1 signaling pathway	0.528227	1	3	35	159	Over	L-Ascorbate	cpd:C00072
map04913	Ovarian steroidogenesis	0.528227	1	3	35	159	Over	12(S)-HETE	cpd:C14777
map04925	Aldosterone synthesis and secretion	0.528227	1	3	35	159	Over	12(S)-HETE	cpd:C14777
map00120	Primary bile acid biosynthesis	0.613685	2	6	35	159	Over	Taurocholic acid, Glycochenodeoxycholic acid	cpd:C05122,cpd:C05466
map04978	Mineral absorption	0.613685	2	6	35	159	Over	L-Proline, L-Asparagine	cpd:C00148,cpd:C00152
map00360	Phenylalanine metabolism	0.649455	2	7	35	159	Over	L-Tyrosine, D-Phenylalanine	cpd:C00082,cpd:C02265
map02010	ABC transporters	1	6	25	35	159	Over	L-Proline, 5-Aminolevulinate, Serine, Spermidine, L-Histidine, glutathione	cpd:C00148,cpd:C00430,cpd:C00716;cpd:C00065,cpd:C00315,cpd:C00135,cpd:C00051
map00260	Glycine, serine and threonine metabolism	1	3	13	35	159	Over	5-Aminolevulinate, Serine, Sarcosine	cpd:C00430,cpd:C00716;cpd:C00065,cpd:C00213
map00310	Lysine degradation	1	2	9	35	159	Over	L-Saccharopine, acetoacetate	cpd:C00449,cpd:C00164
map00340	Histidine metabolism	1	2	9	35	159	Over	Histamine, L-Histidine	cpd:C00388,cpd:C00135
map00730	Thiamine metabolism	1	1	4	35	159	Over	L-Tyrosine	cpd:C00082
map00760	Nicotinate and nicotinamide metabolism	1	1	4	35	159	Over	Nicotinamide	cpd:C00153
map01230	Biosynthesis of amino acids	1	5	22	35	159	Over	L-Proline, L-Saccharopine, L-Asparagine, Serine, L-Histidine	cpd:C00148,cpd:C00449,cpd:C00152,cpd:C00716;cpd:C00065,cpd:C00135

## Sheet: Fig 4B
Compound_ID	Name	Chinese name	RT [min]	Formula	Molecular Weight	Class(Chinese)	Class(English)	all_AKK_3dpi_1	all_AKK_3dpi_2	all_AKK_3dpi_3	all_AKK_3dpi_4	all_AKK_3dpi_5	all_ABX_3dpi_1	all_ABX_3dpi_2	all_ABX_3dpi_3	all_ABX_3dpi_4	all_ABX_3dpi_5	all_ABX_3dpi_6	all_ABX_3dpi_7	all_ABX_3dpi_8	FC	log2FC	Pvalue	ROC	VIP	Up.Down
Com_67_neg	Taurocholic acid	牛磺胆酸	14.08	C26H45NO7S	515.7	胆汁酸	Bile Acids	142100000	117100000	146200000	77740000	114800000	54430	35750	27170	30040	47410	30590	1630000	123600	483.43	8.91716	5.52e-07	1	1.93193	up
Com_17_neg	Taurochenodeoxycholic acid sodium salt	牛磺鹅去氧胆酸钠盐	15.01	C26H44NO6S.Na	521.68	胆汁酸	Bile Acids	40960000	34590000	43540000	17250000	30080000	28110	19410	16060	14210	26960	14610	394100	52920	470.13	8.87691	4.37e-08	1	1.96904	up
Com_145_neg	Taurodeoxycholic acid sodium salt	牛磺脱氧胆酸钠盐	15.25	C26H44NNaO6S	521.69	胆汁酸	Bile Acids	47650000	41140000	50960000	20300000	35030000	26260	25400	18480	23050	27780	20620	472500	63720	460.495	8.84704	3.37e-08	1	2.02567	up
Com_68_neg	Tauro-alpha-Muricholic acid sodium salt	牛磺-阿尔法-鼠胆酸钠盐	12.38	C26H44NO7S.Na	537.69	胆汁酸	Bile Acids	416200000	421100000	396900000	358700000	384700000	251900	197100	149400	199500	316800	148100	15970000	457100	178.868	7.48275	4.32e-06	1	1.85754	up
Com_147_neg	Taurohyocholic acid sodium salt	牛磺猪胆酸钠盐	13.36	C26H44NNaO7S	537.69	胆汁酸	Bile Acids	298100000	316900000	294900000	267700000	291400000	217300	191600	117800	240300	221800	97210	15180000	332600	141.602	7.1457	6.12e-06	1	1.82698	up
Com_107_neg	estrone 3-sulfate	雌酮-3-硫酸盐	8.49	C18H22O5S	349.421	激素	Hormones	159500	75710	119700	56360	96720	4071	3301	1971	3704	2705	2210	2639	5073	31.6579	4.98449	6.78e-07	1	2.0154	up
Com_184_neg	8,15-Dihete	8,15-二羟基二十碳四烯酸	7.72	C20H32O4	336.466	脂肪酸	Fatty Acids	16850	7029	11770	4971	8966	451	321	129	384	276	349	165	524	30.5262	4.93198	5.65e-07	1	2.33972	up
Com_400_pos	Mag (18:1) Isomer1	单酰甘油酯(酰基18:1)异构1	18.14			脂肪酸	Fatty Acids	206200	622200	88350	352700	623200	21320	12080	8515	20940	16450	15050	14440	11840	25.1025	4.64976	0.000698115	1	2.02458	up
Com_403_pos	3'-Aenylic Acid	腺苷-3'-磷酸	0.73	C10H14N5O7P	347.221	核苷酸及其衍生物	Nucleotide And Its Derivates	502300	1049000	1065000	148600	1003000	18050	8237	11200	13080	13430	113493	11810	65915	23.6218	4.56205	6.87e-05	1	1.89782	up
Com_65_neg	Glycodeoxycholic acid	甘氨脱氧胆酸	15.26	C26H43NO5	449.628	胆汁酸	Bile Acids	721700	690900	587900	559700	530200	35990	16000	27760	26810	35680	24170	34680	19440	22.4216	4.48682	8.65e-11	1	1.75305	up
Com_76_neg	Glycochenodeoxycholic acid	甘氨鹅脱氧胆酸钠盐	15.06	C26H43NO5.Na	471.6	胆汁酸	Bile Acids	679400	668000	553300	543000	519300	33780	15210	30050	32660	33460	25140	31370	18170	21.5648	4.4306	2e-10	1	1.7283	up
Com_16_neg	Glycolithocholic acid	甘氨石胆酸	16.01	C26H43NO4	433.629	胆汁酸	Bile Acids	2923000	3943000	4034000	1741000	3316000	311000	126500	156100	105200	254700	142900	227400	55360	18.5121	4.2104	1.09e-07	1	1.63187	up
Com_244_pos	Pro-Leu	脯氨酸-亮氨酸	2.94	C11H20N2O3	228.288	氨基酸及其衍生物	Amino Acid And Its Derivatives	27080	74210	21440	25910	37270	1947	899	784	720	1516	1649	949	8228	17.8203	4.15545	2.53e-06	1	1.9589	up
Com_441_pos	Vitamin A	维生素A	18.24	C20H30O	286.452	维生素	Vitamins	209200	270700	199900	272100	298400	15820	14090	16190	16290	18710	13470	16500	25470	14.6512	3.87295	5.8e-10	1	2.00227	up
Com_353_pos	All-Trans-13,14-Dihydroretinol	反式-13,14-二羟视黄醇	18.25	C20H32O	288.467	维生素	Vitamins	2175000	2765000	2090000	2916000	3175000	183000	149900	169200	177300	188000	150200	196400	275100	14.0982	3.81744	1.58e-09	1	2.00107	up
Com_4_neg	12(S)-HETE	12-羟二十烷四烯酸	15.48	C20H32O3	320.466	氧化脂质	Lipid Peroxides	1953000	2022000	1498000	2408000	1341000	169000	74580	125100	151200	197600	126100	156100	113800	13.2514	3.72808	7.07e-09	1	1.62109	up
Com_183_neg	8(R)-Hydroxy-(5Z,9E,11Z,14Z)-eicosatetraenoic acid	8(R)-羟基二十碳四烯酸	15.9	C20H32O3	320.466	氧化脂质	Lipid Peroxides	1888000	1698000	1140000	1689000	1069000	196400	75450	138000	155300	212400	135200	171000	116500	9.97659	3.31855	5.05e-08	1	1.47243	up
Com_268_pos	All-cis-4,7,10,13,16-docosapentaenoic acid	二十二碳五烯酸	18.29	C22H34O2	330.504	脂肪酸	Fatty Acids	733000	1719000	516700	1552000	1286000	142500	110900	109300	100600	142200	146600	125100	93040	9.57569	3.25938	0.000425654	1	2.23302	up
Com_344_pos	Glycerol 1-hexadecanoate	单棕榈酸甘油酯	17.18	C19H38O4	330.503	脂质和类脂分子	Lipids and lipid-like molecules	104700	258400	44360	165700	175500	16170	13250	39956	27081	12850	12480	9559	7731	8.6129	3.1065	0.000500272	1	1.90264	up
Com_207_pos	Adenosine 5'-monophosphate	5'-腺嘌呤核苷酸	0.73	C10H14N5O7P	347.221	核苷酸及其衍生物	Nucleotide And Its Derivates	286500	623400	642900	72280	577700	88338	69381	66631	73746	78946	11170	74201	47427	6.91285	2.78928	0.00756504	0.9	1.42794	up
Com_392_pos	PC(16:0/16:0)	二棕榈酸磷脂酰胆碱	23.035	C40H80NO8P	734.051	甘油磷脂	Glycerophospholipids	47300000	76000000	57030000	46330000	55630000	9883000	5675000	10640000	7444000	10810000	7432000	6743000	7566000	6.82344	2.7705	2.79e-08	1	2.23964	up
Com_273_pos	9-Hydroxy-(10E,12Z,15Z)-Octadecatrienoic Acid	9-羟基-(10E,12Z,15Z)十八碳三烯酸	15.14	C18H30O3	294.429	脂肪酸	Fatty Acids	14450	24080	10030	11440	21540	4543	1428	2283	2850	1743	2408	5211	5530	5.01862	2.32729	4.38e-05	1	1.9809	up
Com_140_neg	Linolelaidic Acid (C18:2N6T)	反亚油酸	17.06	C18H32O2	280.445	游离脂肪酸	Free Fatty Acid	22920000	41890000	16080000	32970000	35130000	10320000	3615000	5373000	5723000	7232000	3967000	6978000	6280000	4.81701	2.26814	8.08e-05	1	1.74712	up
Com_306_pos	Cytidine-5'-monophosphate	胞苷-5-单磷酸	0.71	C9H14N3O8P	323.197	核苷酸及其衍生物	Nucleotide And Its Derivates	26550	28350	37820	33490	31400	8718	5350	7564	4471	4293	6708	10950	4765	4.77434	2.2553	3.41e-07	1	1.9507	up
Com_175_neg	Lysops 22:6	溶血卵磷脂酰丝氨酸22:6	16.89	C28H44NO9P	569.62	磷脂	Phospholipid	390300	703800	162100	281700	262600	88730	64400	66410	121100	109900	97690	75450	59240	4.21836	2.07668	0.00311835	1	1.63023	up
Com_24_neg	D-Glucoronic Acid	葡萄糖醛酸	0.63	C6H10O7	194.139	糖酸及其衍生物	Sugar Acids And Its Derivatives	49950	41950	40700	42040	39800	16360	11190	11180	7583	5586	9181	5873	15210	4.17589	2.06209	7.34e-06	1	1.9103	up
Com_342_pos	Glycyl-L-Proline	甘氨酰-L-脯氨酸	0.75	C7H12N2O3	172.182	氨基酸及其衍生物	Amino Acid And Its Derivatives	27400	32010	25810	24000	23940	13860	9482	3611	6007	6713	2270	6587	3861	4.06665	2.02384	8.52e-05	1	1.69478	up
Com_293_pos	10E,12Z-Octadecadienoic acid	10E,12Z-十八碳二烯酸	18.26	C18H32O2	280.445	脂肪酸	Fatty Acids	926400	1910000	626000	1380000	1532000	548900	191200	288600	357200	458300	218800	392100	351400	3.63408	1.86159	0.000896556	1	1.63228	up
Com_367_pos	Spermidine	亚精胺	0.63	C7H19N3	145.246	其他	Others	28110	32070	65300	29440	25790	2112	3582	18280	13090	13520	9455	13100	8442	3.54416	1.82544	0.00102067	1	1.31041	up
Com_430_pos	Isobutyrylglycine	2-(异丁基氨基)乙酸	0.6	C6H11NO3	145.156	有机酸及其衍生物	Organic Acid And Its Derivatives	121400	112000	195200	131700	158000	32850	35340	54750	24340	55980	42050	68400	24590	3.39722	1.76436	1.2e-05	1	1.53308	up
Com_210_pos	Adenosine	腺苷	1.02	C10H13N5O4	267.241	核苷酸及其衍生物	Nucleotide And Its Derivates	48300	51650	42210	40450	49440	6815	4039	2791	40721	22335	23158	2890	8700	3.33139	1.73612	0.00261391	0.975	1.0294	up
Com_212_pos	S-(5-Adenosy)-L-Homocysteine	S-(5'-腺苷)-L-高半胱氨酸	0.74	C14H20N6O5S	384.411	氨基酸及其衍生物	Amino Acid And Its Derivatives	5407	9460	14850	3607	14410	903	2702	3178	449	449	4284	6303	4910	3.29512	1.72033	0.0104736	0.9	1.22403	up
Com_47_neg	D-sedoheptulose-1-7-phosphate	1-7-磷酸化-D-景天庚酮糖	0.62			糖类	Carbohydrates	33490	28150	9167	19790	13430	7573	5580	6502	6780	8775	8774	7175	2390	3.10824	1.6361	0.00577292	1	1.13924	up
Com_193_pos	Alpha-Linolenic acid	α-亚麻酸	17.5	C18H30O2	278.435	脂肪酸	Fatty Acids	425000	948900	199700	735700	596500	360800	109300	174300	152500	224600	86070	186100	216300	3.07905	1.62249	0.0110634	0.925	1.35723	up
Com_247_pos	Punicic Acid	石榴酸	17.42	C18H30O2	278.43	脂肪酸	Fatty Acids	711900	1611000	328500	1215000	1019000	609100	186800	299400	249700	382000	147700	331200	374800	3.02888	1.59879	0.0129669	0.9	1.33481	up
Com_276_pos	N7-Methylguanosine	7-甲基鸟苷	1.07	C11H17N5O5	299.28	核苷酸及其衍生物	Nucleotide And Its Derivates	54380	40430	66040	47370	63760	21420	13080	10950	20004	25600	23607	10490	22480	2.94767	1.55958	2.06e-05	1	1.67651	up
Com_260_pos	L-Tyrosine	L-酪氨酸	0.83	C9H11NO3	181.189	氨基酸及其衍生物	Amino Acid And Its Derivatives	1321000	2036000	879400	1076000	1408000	468100	372100	423500	475100	588800	467900	544800	468400	2.82318	1.49732	0.00107908	1	1.75105	up
Com_187_pos	Niflumic Acid	氟尼酸	19.19	C13H9F3N2O2	282.218	苯及其衍生物	Benzene and substituted derivatives	590600	1108000	375400	863300	816900	509800	130200	232600	232900	325900	154800	305200	260700	2.7911	1.48083	0.00196819	0.975	1.38688	up
Com_292_pos	1-(4-Methoxyphenyl)-2-propanone	1-(4-甲氧基苯基)-2-丙酮	1.03	C10H12O2	164.201	苯及其衍生物	Benzene and substituted derivatives	137200	203000	60960	109100	102600	43370	38170	34620	45850	63430	27900	43400	57360	2.76921	1.46947	0.00450379	0.975	1.85046	up
Com_380_pos	N'-Feruloyl Putrescine	N'-阿魏酰腐胺	19.2	-		酚胺	Phenolamides	509900	959000	313300	740500	724400	419600	120900	229700	206400	264100	138300	288800	215200	2.75909	1.46419	0.00276803	0.975	1.36528	up
Com_127_neg	cis-7-Hexadecenoic Acid	顺式-7-十六碳烯酸	16.66	C16H30O2	254.408	脂肪酸	Fatty Acids	8764000	24640000	6239000	22170000	11460000	9765000	3078000	5115000	4494000	6372000	3378000	5915000	5065000	2.71495	1.44092	0.0205634	0.925	1.23466	up
Com_406_pos	L-Methionine sulfone	L-蛋氨酸砜	0.71	C5H11NO4S	181.21	氨基酸及其衍生物	Amino Acid And Its Derivatives	849800	1384000	579300	614200	828400	298700	283600	274600	266700	409400	335300	324600	322100	2.7074	1.43691	0.00230269	1	1.6921	up
Com_440_pos	γ-Glutamylglutamic acid	γ-谷氨酰谷氨酸	0.75	C10H16N2O7	276.243	氨基酸及其衍生物	Amino Acid And Its Derivatives	143500	148700	102400	69180	104900	51070	65330	59230	23800	35750	38020	40930	25460	2.67937	1.42189	0.000372392	1	1.97349	up
Com_398_pos	Carnitine-C12	肉毒碱-C12	12.23			肉碱类	Carnitine	163100	487200	182500	299000	199200	149100	42340	106500	113900	159000	76630	116500	40060	2.64866	1.40526	0.00486767	1	1.14975	up
Com_357_pos	2-(3,4-dimethoxyphenyl)ethanamine	2-(3,4-二甲氧基苯基)乙胺	1.03	C10H15NO2	181.232	苯及其衍生物	Benzene and substituted derivatives	413400	847000	264900	383800	354600	172800	204800	171500	154600	208000	201300	135900	124300	2.63758	1.39921	0.00678601	1	1.65858	up
Com_66_neg	Taurohyodeoxycholic acid sodium salt	牛磺猪脱氧胆酸钠盐	13.65	C26H44NNaO6S	521.69	胆汁酸	Bile Acids	2640000	2746000	2096000	2262000	1680000	922900	885100	909200	860700	895000	908500	780500	895100	2.59011	1.37301	0.000303644	1	2.09457	up
Com_349_pos	Asp-Phe methyl ester	阿斯巴甜	3.79	C14H18N2O5	294.303	有机酸及其衍生物	Organic Acid And Its Derivatives	410900	645400	269100	388200	304200	182700	204000	184700	114200	165800	159100	167900	84480	2.55644	1.35414	0.00111032	1	1.99096	up
Com_261_pos	L-Saccharopine	L-酵母氨酸	0.69	C11H20N2O6	276.286	氨基酸及其衍生物	Amino Acid And Its Derivatives	119300	132100	94590	96100	81090	56370	50820	55400	20370	33320	42450	50770	26800	2.48911	1.31563	9.73e-05	1	1.86717	up
Com_308_pos	Cystine	DL-胱氨酸	0.75	C6H12N2O4S2	240.301	氨基酸及其衍生物	Amino Acid And Its Derivatives	186100	414500	91190	153600	167200	99930	86510	75310	83260	87820	71320	113800	62290	2.38172	1.25201	0.0335877	0.95	1.43527	up
Com_78_neg	Homoarginine	高精氨酸	0.74	C7H16N4O2	188.227	氨基酸及其衍生物	Amino Acid And Its Derivatives	2001	2401	2803	2400	3199	801	401	2800	399	1600	399	1205	1607	2.22388	1.15308	0.00600613	0.925	1.20048	up
Com_208_pos	Adenine	腺嘌呤	1.02	C5H5N5	135.127	核苷酸及其衍生物	Nucleotide And Its Derivates	75190	127400	46540	70900	86410	73230	32050	23420	26930	31290	31190	36040	38610	2.22129	1.1514	0.00388596	0.95	1.6759	up
Com_234_pos	Methionine sulfoxide	蛋氨酸砜	0.8	C5H11NO4S	181.21	氨基酸及其衍生物	Amino Acid And Its Derivatives	53170	41600	49440	29380	45480	13490	25350	17590	10230	25380	17960	15400	33090	2.21157	1.14507	0.000459837	0.975	1.14505	up
Com_49_neg	D-Ribose 5-phophate	D-核糖-5-磷酸	0.58	C5H11O8P	230.11	有机酸及其衍生物	Organic Acid And Its Derivatives	33550	35620	27260	26480	37820	23910	10390	17750	3066	15560	17100	20540	11560	2.14528	1.10117	0.00560448	1	1.28188	up
Com_120_neg	Gamma-Glu-Leu	γ-谷氨酸-亮氨酸	1.68	C11H20N2O5	260.287	有机酸及其衍生物	Organic Acid And Its Derivatives	5055	8736	4318	4391	2490	3369	1112	2395	1271	2369	3602	2978	1637	2.13442	1.09384	0.0163345	0.925	1.31132	up
Com_132_neg	Pyroglutamic acid	焦谷氨酸	0.77	C5H7NO3	129.114	有机酸及其衍生物	Organic Acid And Its Derivatives	2397	2398	3597	3999	2401	1997	2798	399	798	1598	1599	1599	399	2.1156	1.08107	0.00942795	0.925	1.20374	up
Com_252_pos	Nε,Nε,Nε-trimethyllysine	Nε,Nε,Nε-三甲基赖氨酸	0.68	C9H20N2O2	188.267	氨基酸及其衍生物	Amino Acid And Its Derivatives	162600	203400	145200	138600	156900	72240	65860	48050	80730	107200	83640	86020	75560	2.08416	1.05947	2.12e-05	1	1.24096	up
Com_372_pos	L-(-)-α-Amino-ε-Caprolactam	3-氨基六氢-2H-氮杂卓-2-酮	0.78	C6H12N2O	128.172	脂质和类脂分子	Lipids and lipid-like molecules	42920	50030	31910	20950	38440	21380	11920	28940	17270	21560	13680	18420	9896	2.06059	1.04306	0.00443832	0.925	1.46828	up
Com_64_neg	Nervonic acid	神经酸	19.3	C24H46O2	366.621	脂肪酸	Fatty Acids	145200	204500	116300	149000	153100	88800	66890	79770	74470	93370	74480	73570	73130	1.96797	0.976711	0.000703678	1	1.26746	up
Com_432_pos	6-Aminonicotinamide	6-氨基烟酰胺	0.89	C6H7N3O	137.139	吡啶及其衍生物	Pyridine And Its Derivatives	47650	57320	38910	32950	41640	26950	26750	18670	14550	23430	36440	19620	16580	1.91022	0.933742	0.000653467	0.975	1.58907	up
Com_195_pos	L-Proline	L-脯氨酸	0.76	C5H9NO2	115.132	氨基酸及其衍生物	Amino Acid And Its Derivatives	2195000	2799000	1497000	2034000	1936000	942900	1074000	1173000	1045000	1348000	1037000	1056000	1272000	1.87056	0.903472	0.00195503	1	1.66448	up
Com_309_pos	Cys-Gly	半胱氨酰甘氨酸	0.65	C5H10N2O3S	178.21	氨基酸及其衍生物	Amino Acid And Its Derivatives	11950	20760	12060	9921	14070	11310	9905	7564	4597	6284	8291	8570	2700	1.85775	0.893554	0.00786191	0.975	1.25305	up
Com_202_pos	Carnitine-C8	肉毒碱-C8	8.44			肉碱类	Carnitine	46120	138800	52090	98790	62310	39890	28510	50190	39820	66350	37150	50940	30580	1.85475	0.891223	0.0499881	0.875	1.2189	up
Com_423_pos	glutathione	谷胱甘肽	0.78	C10H17N3O6S	307.323	氨基酸及其衍生物	Amino Acid And Its Derivatives	84660	67410	67750	59170	56700	33360	44120	38690	26130	53360	22090	36940	36240	1.84616	0.884529	0.000271662	1	1.34877	up
Com_186_pos	Nicotinamide	烟酰胺	1.02	C6H6N2O	122.125	维生素	Vitamins	106800	159000	81560	114300	78290	70950	74110	66860	37400	66980	58280	44180	50740	1.84009	0.879773	0.00518462	1	1.21065	up
Com_74_neg	3-dehydrocholic acid	3-脱氢胆酸	13.45	C24H38O5	406.562	胆汁酸	Bile Acids	8104	12510	11210	16730	12430	4878	9738	6588	8225	3502	7079	8302	4828	1.83618	0.876704	0.00360764	0.925	1.14101	up
Com_282_pos	DL-Leucine	DL-亮氨酸	1.08	C6H13NO2	131.173	氨基酸及其衍生物	Amino Acid And Its Derivatives	325500	561000	294300	353700	286400	214900	153900	195100	112000	257700	254400	224300	180500	1.82913	0.871158	0.00414009	1	1.6825	up
Com_363_pos	dimethyl-L-arginine	二甲基-L-精氨酸	0.73	C8H18N4O2	202.254	氨基酸及其衍生物	Amino Acid And Its Derivatives	30150	38320	25090	20220	30210	24080	10270	17910	13420	21280	16350	12570	13250	1.78412	0.835216	0.00246625	0.95	1.42977	up
Com_174_neg	Lysope 18:1	溶血卵磷脂酰乙醇胺18:1	18.35	C23H46NO7P	479.588	磷脂	Phospholipid	1417000	2393000	939700	1200000	1190000	998000	639300	625500	955100	797000	805600	678800	943600	1.77304	0.826225	0.0227158	0.925	1.00304	up
Com_351_pos	6-Aminohexanoate	6-氨基己酸	1.26	C6H13NO2	131.173	有机酸及其衍生物	Organic Acid And Its Derivatives	486500	1065000	432500	520600	505400	453600	244200	281300	251100	453200	416800	366000	255000	1.76981	0.823592	0.0230041	0.95	1.60204	up
Com_384_pos	Proline	DL-脯氨酸	0.74	C5H9NO2	115.131	氨基酸及其衍生物	Amino Acid And Its Derivatives	2452000	3098000	1711000	2359000	2362000	1434000	1326000	1368000	1288000	1633000	1271000	1159000	1487000	1.74824	0.805903	0.00256699	1	1.56293	up
Com_216_pos	Dl-Dihydrosphingosine	DL-二氢鞘氨醇	13.31	C18H39NO2	301.508	脂质和类脂分子	Lipids and lipid-like molecules	12070	14910	14630	15690	13110	6707	7269	7445	15520	7663	4820	7519	7528	1.74739	0.805202	0.000833023	0.9	1.25196	up
Com_451_pos	Isoleucine	异亮氨酸	1.1	C6H13NO2	131.173	氨基酸及其衍生物	Amino Acid And Its Derivatives	9097000	15170000	7720000	8448000	8274000	6872000	3759000	5308000	4249000	7584000	6371000	6548000	4642000	1.71915	0.781699	0.00732446	1	1.6066	up
Com_413_pos	Urethane	氨基甲酸乙酯	0.71	C3H7NO2	89.093	有机酸及其衍生物	Organic Acid And Its Derivatives	408700	606800	494900	558100	593700	346300	282700	367200	216300	285300	369000	319700	301500	1.71203	0.775704	0.000293784	1	1.88333	up
Com_153_neg	D-Histidine	D-组氨酸	0.61	C6H9N3O2	155.155	氨基酸及其衍生物	Amino Acid And Its Derivatives	49130	99940	42390	45590	78450	35880	41120	36030	38850	37840	29540	36170	39430	1.712	0.775682	0.0441325	1	1.34372	up
Com_368_pos	S-Methyl-5'-thioadenosine	S-甲基-5'-硫腺嘌呤	2.55	C11H15N5O3S	297.333	核苷酸及其衍生物	Nucleotide And Its Derivates	9089	7823	6682	6171	8526	5976	3097	4187	2293	4399	3869	6269	5785	1.70775	0.772098	0.00225176	0.975	1.5591	up
Com_396_pos	Benzamidine Hydrochloride Hydrate	苯甲脒	1.86	C7H11ClN2O	174.628	苯及其衍生物	Benzene and substituted derivatives	214300	303500	168900	192400	206400	145100	122500	120600	126600	147800	138400	120300	96820	1.70589	0.770524	0.0030582	1	1.70996	up
Com_416_pos	Lysopc 18:2	溶血卵磷脂酰胆碱18:2	14.44	C26H50NO7P	519.65	磷脂	Phospholipid	18170000	31400000	14950000	18410000	15970000	12100000	9536000	10050000	12220000	12130000	10030000	10350000	16660000	1.70012	0.765633	0.013231	0.95	1.02937	up
Com_198_pos	Desaminotyrosine	对羟基苯丙酸	1.82	C9H10O3	166.177	脂肪酸	Fatty Acids	405800	520900	290800	351800	381800	249800	205900	238000	205100	296800	258300	224600	159700	1.69827	0.764066	0.00204914	0.975	1.71652	up
Com_219_pos	Trimethyllysine	三甲基赖氨酸	0.69	C9H21N2O2	189.275	氨基酸及其衍生物	Amino Acid And Its Derivatives	171400	277900	195200	127000	162200	114500	108400	107800	116300	115300	142600	91920	84370	1.69534	0.761578	0.0129414	0.975	1.33251	up
Com_275_pos	7-Methylguanine	7-甲基鸟嘌呤	1.85	C6H7N5O	165.153	核苷酸及其衍生物	Nucleotide And Its Derivates	2588000	3874000	2063000	2298000	2614000	1702000	1542000	1651000	1563000	1820000	1802000	1500000	1137000	1.69059	0.757525	0.00517179	1	1.7028	up
Com_454_pos	D-Isoleucine	D-异亮氨酸	1.02	C6H13NO2	131.173	氨基酸及其衍生物	Amino Acid And Its Derivatives	10800000	18870000	9864000	10320000	10530000	9552000	4967000	6216000	5226000	9728000	8338000	7570000	5656000	1.6875	0.754887	0.00836402	1	1.61686	up
Com_302_pos	D-Phenylalanine	D-苯丙氨酸	1.36	C9H11NO2	165.189	氨基酸及其衍生物	Amino Acid And Its Derivatives	6721000	10320000	5833000	6354000	6867000	5057000	4186000	4529000	4040000	4889000	4617000	3871000	3126000	1.683	0.751032	0.00333303	1	1.6954	up
Com_347_pos	L-Asparagine	L-天冬门酰胺	1.21	C4H8N2O3	132.118	氨基酸及其衍生物	Amino Acid And Its Derivatives	696800	1265000	666900	716100	687600	571600	352000	419900	362900	545100	604100	501500	489500	1.67728	0.746127	0.00961002	1	1.60838	up
Com_329_pos	5-Aminolevulinate	5-氨基乙酰丙酸	1.25	C5H9NO3	131.13	有机酸及其衍生物	Organic Acid And Its Derivatives	34400	66980	31140	40330	24790	26170	12910	23200	27670	26150	29970	20240	23780	1.66355	0.734264	0.0435108	0.9	1.04007	up
Com_278_pos	2-(Formylamino)Benzoic Acid	2-(甲酰氨基)苯甲酸	1.86	C8H7NO3	164.138	苯甲酸及其衍生物	Benzoic Acid And Its Derivatives	1112000	1663000	874900	981700	1097000	769900	685400	709700	670500	823300	712500	725800	496000	1.63876	0.712606	0.00756758	1	1.61792	up
Com_188_pos	N-Methyl-a-aminoisobutyric acid	N-甲基-α-氨基异丁酸	1.02	C5H11NO2	117.146	有机酸及其衍生物	Organic Acid And Its Derivatives	2645000	3617000	2271000	2163000	2401000	1417000	1068000	1310000	1203000	2043000	1882000	2155000	1713000	1.63828	0.712179	0.00286485	1	1.49154	up
Com_287_pos	Guanidineacetic Acid	胍基乙酸	0.79	C3H7N3O2	117.107	有机酸及其衍生物	Organic Acid And Its Derivatives	3143000	4909000	3178000	2769000	2937000	2374000	1396000	1900000	1555000	2312000	2488000	2553000	2080000	1.6267	0.70195	0.00485303	1	1.56904	up
Com_409_pos	L-Hydroxyproline	L-羟脯氨酸	0.72	C5H9NO3	131.13	氨基酸及其衍生物	Amino Acid And Its Derivatives	6925000	12390000	5937000	7740000	6506000	6151000	3447000	4102000	3931000	7049000	5606000	5368000	4059000	1.59134	0.67024	0.0203701	0.9	1.42707	up
Com_386_pos	L-Histidine	L-组氨酸	0.66	C6H9N3O2	155.156	氨基酸及其衍生物	Amino Acid And Its Derivatives	323400	481200	276900	329000	327300	263100	204800	229100	185200	258500	198500	201800	207100	1.59057	0.669546	0.00439601	1	1.65511	up
Com_176_neg	(S)-2-Hydroxybutanoicacid	(S)-2-羟基丁酸	0.77	C4H8O3	104.104	有机酸及其衍生物	Organic Acid And Its Derivatives	6887	11680	11460	12380	16170	7398	6326	3328	8428	8878	12400	7514	4704	1.58918	0.668278	0.0315899	0.8	1.03495	up
Com_383_pos	Dl-Valine	DL-缬氨酸	0.77	C5H11NO2	117.146	氨基酸及其衍生物	Amino Acid And Its Derivatives	2533000	3860000	2604000	2338000	2483000	1694000	1139000	1521000	1334000	2166000	1932000	2500000	1742000	1.57605	0.656311	0.00422221	0.95	1.4884	up
Com_242_pos	Chlorogenic Acid Methyl Ester	绿原酸甲酯	21.88	C17H20O9	368.335	有机酸及其衍生物	Organic Acid And Its Derivatives	402200	342600	395000	399800	431500	230400	223000	285900	288300	277300	249900	255800	198600	1.56966	0.650452	1.1e-05	1	1.51751	up
Com_289_pos	Histidine	组氨酸	0.66	C6H9N3O2	155.15	氨基酸及其衍生物	Amino Acid And Its Derivatives	1216000	1773000	1054000	1176000	1262000	947200	852300	875800	756800	883700	787200	850400	734500	1.5505	0.632735	0.00599342	1	1.68178	up
Com_239_pos	3-O-Feruloylquinic acid	3-O-阿魏酰奎宁酸	21.89	C17H20O9	368.335	有机酸及其衍生物	Organic Acid And Its Derivatives	209400	179200	197200	213400	229600	120100	118600	152200	154900	142100	135200	135400	105300	1.54736	0.629808	2.49e-05	1	1.52158	up
Com_290_pos	Histamine	组胺	0.62	C5H9N3	111.145	氨基酸及其衍生物	Amino Acid And Its Derivatives	37490	42890	46620	35670	29200	28990	19280	26850	24800	29120	20970	34390	16940	1.52474	0.608567	0.0037476	0.975	1.52539	up
Com_364_pos	Serine	丝氨酸	0.71	C3H7NO3	105.093	氨基酸及其衍生物	Amino Acid And Its Derivatives	155700	215500	132000	129400	115200	87540	87940	125400	99450	116800	102100	84960	94560	1.49794	0.58298	0.01891	0.95	1.31731	up
Com_2_neg	13-Hotre(R)	13-羟基十八碳三烯酸	12.19	C18H30O3	294.429	氧化脂质	Lipid Peroxides	96270	99550	100100	112700	105600	55700	70530	66030	71340	70060	65860	75640	78010	1.48734	0.572735	2.85e-06	1	1.48906	up
Com_38_neg	N-Oleoyl Glycine	N-油酰甘氨酸	17.41	C20H37NO3	339.513	有机酸及其衍生物	Organic Acid And Its Derivatives	1961	2490	1572	2061	1893	1398	1271	1275	1348	1238	1489	1143	1598	1.48357	0.569072	0.00321651	0.975	1.54478	up
Com_355_pos	D-glucosamine-1-phosphate	D-葡萄糖胺-1-磷酸	22.05	C6H14NO8P	259.151	其他	Others	2405	1676	2258	2314	2053	1452	1498	2018	1853	1715	1144	1277	692	1.47048	0.556285	0.0110144	0.925	1.09259	up
Com_253_pos	Oxypurinol	羟基嘌呤	0.88	C5H4N4O2	152.11	有机杂环化合物	Organoheterocyclic compounds	77340	69530	83890	57040	95100	40380	81280	51850	33140	30850	83700	48950	46570	1.47015	0.555961	0.0188561	0.85	1.11348	up
Com_108_neg	Lysope 16:0	溶血卵磷脂酰乙醇胺16:0	18.12	C21H44NO7P	453.55	磷脂	Phospholipid	3283000	5587000	2567000	3988000	3661000	3402000	2098000	2338000	3146000	2801000	2842000	2641000	1811000	1.44872	0.53478	0.0473564	0.85	1.32861	up
Com_378_pos	1-Methyladenosine	1-甲基腺苷	0.76	C11H15N5O4	281.268	核苷酸及其衍生物	Nucleotide And Its Derivates	71150	81290	72830	75920	77250	40900	42940	61370	46680	57480	61550	51980	60100	1.43145	0.517479	0.000243917	1	1.17281	up
Com_322_pos	L-Cysteine-glutathione gisulfide	L-半胱氨酸谷胱甘肽二硫化物	0.7	C13H22N4O8S2	426.466	氨基酸及其衍生物	Amino Acid And Its Derivatives	500800	403400	334300	323200	389900	263000	325300	275000	186700	274700	343300	323200	216500	1.4144	0.500185	0.00856119	0.9125	1.0546	up
Com_103_neg	Dl-Tryptophan	DL-色氨酸	4.11	C11H12N2O2	204.225	氨基酸及其衍生物	Amino Acid And Its Derivatives	99900	131300	80850	92580	80100	39970	76680	58120	56710	62480	72200	59420	123000	1.41377	0.499551	0.0247252	0.9	1.05614	up
Com_445_pos	Sarcosine	肌氨酸	0.74	C3H7NO2	89.093	氨基酸及其衍生物	Amino Acid And Its Derivatives	620900	608800	489600	486600	611700	413300	385400	426000	416800	429400	404100	357600	366400	1.40924	0.494918	0.0019133	1	1.57025	up
Com_421_pos	Glu-Glu	谷氨酰-谷氨酸	0.72	C10H16N2O7	276.243	氨基酸及其衍生物	Amino Acid And Its Derivatives	115800	168700	174200	213700	134100	154100	100800	72310	95430	174000	113700	138100	70360	1.40444	0.489996	0.0432652	0.825	1.01098	up
Com_209_pos	Acetylcholine	乙酰胆碱	0.76	C7H15NO2	146.207	胆碱类	Cholines	127900	104000	129600	79670	93660	57990	71860	91100	75410	77810	104300	68550	77420	1.37039	0.454589	0.0250667	0.9	1.07152	up
Com_266_pos	Alanine	丙氨酸	0.74	C3H7NO2	89.09	氨基酸及其衍生物	Amino Acid And Its Derivatives	582200	715600	437700	531700	693200	409400	493500	441800	417400	514800	461000	400100	440100	1.32379	0.40467	0.0377201	0.875	1.20444	up
Com_222_pos	Triethyl phosphate	磷酸三乙酯	29.47	C6H15O4P	182.155	有机酸及其衍生物	Organic Acid And Its Derivatives	131400	196100	153600	143600	149300	118600	97650	127800	122700	112700	129100	116900	150800	1.26853	0.343155	0.0203048	0.925	1.22312	up
Com_192_pos	Folic acid	叶酸	18.88	C19H19N7O6	441.397	维生素	Vitamins	4402	4476	3126	4882	3755	3624	3545	2929	3323	3283	3700	2854	2958	1.25975	0.333137	0.0439029	0.875	1.2251	up
Com_111_neg	Pentadecanoic acid	十五烷酸	16.67	C15H30O2	242.398	脂肪酸	Fatty Acids	1012000	1303000	908000	1265000	1102000	1001000	858600	884300	870200	926400	828900	891900	928200	1.24404	0.315029	0.0329197	0.925	1.52217	up
Com_215_pos	Dl-Alanyl-glycine	DL-丙氨酰甘氨酸	0.7	C5H10N2O3	146.144	氨基酸及其衍生物	Amino Acid And Its Derivatives	8281000	10750000	8155000	9961000	9461000	8090000	8363000	9088000	5173000	8953000	6963000	7132000	6714000	1.2331	0.302287	0.0258417	0.85	1.09492	up
Com_99_neg	acetoacetate	乙酰乙酸	0.72	C4H6O3	102.089	有机酸及其衍生物	Organic Acid And Its Derivatives	166800	152900	164800	176700	156300	221200	202400	201500	201000	211600	203500	176700	216200	0.800441	-0.321134	9.2e-05	0.9875	1.17673	down
Com_30_neg	4-Hydroxy-3-methoxyphenylglycol	4-羟基-3-甲氧基苯乙二醇	0.72			苯及其衍生物	Benzene and substituted derivatives	99300	116300	97720	110300	110700	136800	147000	128500	152600	124600	117400	131200	145900	0.788664	-0.342517	0.00050218	1	1.26963	down
Com_254_pos	PAF C-16	Β-乙酰基-Γ-O-十六烷基-L-Α-卵磷脂	16.51	C26H54NO7P	523.683	甘油磷脂	Glycerophospholipids	114300000	135900000	104900000	121400000	125300000	164600000	141000000	165300000	164600000	163500000	162700000	119500000	142000000	0.787181	-0.345232	0.00285236	0.925	1.52199	down
Com_142_neg	Lysopa 18:0	溶血卵磷脂酸18:0	19.23	C21H43O7P	438.53	磷脂	Phospholipid	10490000	11900000	8816000	10600000	11160000	15350000	12310000	15540000	14230000	14790000	15420000	9656000	13460000	0.765156	-0.386174	0.00566683	0.9	1.34659	down
Com_72_neg	beta-Muricholic acid	贝塔-鼠胆酸	12.52	C24H40O5	408.578	胆汁酸	Bile Acids	263600	255300	328100	372900	380100	440100	412200	436300	430300	419700	443300	418700	439400	0.744186	-0.426265	0.0207493	1	1.96752	down
Com_272_pos	8-Hydroxyguanosine	8-羟基鸟苷	0.78	C10H13N5O6	299.24	核苷酸及其衍生物	Nucleotide And Its Derivates	23970	35720	30090	42540	48160	46480	46160	52160	50850	62580	49460	58130	40510	0.710674	-0.492741	0.0391371	0.9	1.53626	down
Com_415_pos	Uracil	尿嘧啶	1.02	C4H4N2O2	112.087	核苷酸及其衍生物	Nucleotide And Its Derivates	42480	50600	34070	49700	36950	60940	59420	51890	44280	74050	80310	70170	40300	0.710653	-0.492783	0.0176275	0.875	1.10956	down
Com_73_neg	alpha-Muricholic acid	阿尔法-鼠胆酸	12.44	C24H40O5	408.578	胆汁酸	Bile Acids	312700	292900	351900	389200	370200	487800	480400	505400	493900	459800	492100	494600	481200	0.705237	-0.503819	0.00214449	1	2.25844	down
Com_418_pos	Lysopc 20:0	溶血卵磷脂酰胆碱20:0	17.19	C28H58NO7P	551.73	磷脂	Phospholipid	471400	624100	411000	506500	551000	851000	663100	832400	808900	827900	824600	483600	662300	0.689039	-0.537343	0.00400505	0.925	1.43303	down
Com_37_neg	Adenosine 5'-Diphosphate	二磷酸腺苷	0.67	C10H15N5O10P2	427.201	核苷酸及其衍生物	Nucleotide And Its Derivates	10010	7294	12090	6735	7621	17490	15950	12650	15740	9780	13140	13980	10210	0.642556	-0.638107	0.0102731	0.925	1.30988	down
Com_366_pos	Sotalol	索他洛尔	10.35	C12H20N2O3S	272.364	苯及其衍生物	Benzene and substituted derivatives	10030	7526	5657	7889	10170	10560	13380	14260	14120	19710	14930	14430	11890	0.582938	-0.778586	0.00348005	1	1.92629	down
Com_60_neg	Indolelactic acid	3-吲哚乳酸	4.26	C11H11NO3	205.21	吲哚及其衍生物	Indole And Its Derivatives	2003	1694	2706	2308	2493	4546	3389	3032	5323	5245	3806	3727	5123	0.524302	-0.931531	0.000235353	1	1.48954	down
Com_424_pos	5-Hydroxyindole-3-Acetic Acid	5-羟基吲哚-3-乙酸	2.71	C10H9NO3	191.183	吲哚及其衍生物	Indole And Its Derivatives	8303	5570	2219	9104	7367	14600	14510	9590	13270	18950	10790	10880	14850	0.484929	-1.04415	0.0314228	1	1.55917	down
Com_429_pos	5-Methoxyindole-3-acetic acid	5-甲氧基吲哚-3-乙酸	5.6	C11H11NO3	205.21	吲哚及其衍生物	Indole And Its Derivatives	8908	5753	10150	7922	12060	25300	18320	15080	29260	23050	17000	22270	19950	0.421012	-1.24807	0.000546439	1	1.86286	down
Com_134_neg	L-Ascorbate	抗坏血酸	0.7	C6H8O6	176.124	维生素	Vitamins	19920	8496	21360	20170	17540	50770	66160	31390	35460	46740	47980	40330	31480	0.399582	-1.32344	0.00253429	1	1.33752	down
Com_81_neg	deoxyribose-phosphate	脱氧核糖-磷酸	0.65			核苷酸及其衍生物	Nucleotide And Its Derivates	1307	5600	3995	2631	798	7597	6794	7593	9992	6397	7993	5207	5989	0.398346	-1.32791	0.0324295	0.975	1.55648	down
Com_97_neg	Mevalonic acid	甲羟戊酸	0.7	C6H12O4	148.157	脂质和类脂分子	Lipids and lipid-like molecules	3263	5595	3920	4891	3395	6250	10270	7301	9534	23130	4893	10710	24180	0.350089	-1.5142	0.00242024	0.975	1.21334	down
Com_18_neg	Glycoursodeoxycholic acid	甘氨熊脱氧胆酸	13.38	C26H43NO5	449.631	胆汁酸	Bile Acids	47390	25850	35430	37630	27350	214100	106900	175600	319700	154700	220500	228600	162700	0.175537	-2.51015	5.79e-07	1	2.10167	down

## Sheet: Fig 4C
TCDCA
	PBS					Abx					AKK
3 dpi	2.10452	3.94984	1.22908	10.5589	9.39634	1.44635	0.912065	0.638737	1.38609	0.502221	11.9553	11.7114	12.0434	10.7076	11.5099
5 dpi	8.08188	2.07675	5.26965	9.69398	11.4705	3.72014	2.68859	1.55821	3.18526	4.15931	3.47413	11.5619	8.48819	7.85852	7.94588
TCA
	PBS					Abx					AKK
3 dpi	4.31698	6.52775	2.08886	11.2713	10.9876	1.99373	1.38727	0.991342	1.79452	1.16239	13.3439	13.0648	13.385	12.4738	13.0362
5 dpi	8.98548	1.66852	6.78007	9.52621	9.82477	4.56803	2.30116	2.27197	3.39421	7.09695	3.48604	9.90209	8.55338	8.68458	8.75697
TDCA
	PBS					Abx					AKK
3 dpi	0.627094	2.29668	0.625761	7.45934	6.7407	0.602501	0.650539	1.1094	0.521321	0.951323	10.2229	10.011	10.3198	8.9919	9.77901
5 dpi	8.12951	2.24814	5.45755	9.68713	11.2586	3.89223	2.82999	1.66038	3.37292	4.23925	3.55217	11.4776	8.57999	7.97363	7.98067

## Sheet: Fig 4D
IL6 (RNA)
DMSO	TCDCA	GCDCA	TCA	TDCA	T-α-MCA
401.36	143.04	128.78	355.26	454.25	540.96
364.07	217.24	230.89	448.01	237.4	456.45
403.47	230.19	163.7	394.54	229.35	442.54
321.46	201.88	166.79	393.72	179.05	536.12
395.01	224.61	163.94	398.04	205.78	515.51
432.95	222.25	167.09	284.49	175.8	450.27
IL6 (ELISA)
DMSO	TCDCA	GCDCA	TCA	TDCA	T-α-MCA
7.44933	6.42222	5.72057	8.63283	7.73253	8.97849
7.77479	6.83222	5.30634	8.85685	6.75613	8.66926
7.98191	6.62933	5.86851	8.51871	7.2084	8.11264
7.28026	6.71387	6.33345	8.70892	8.19325	7.53835

## Sheet: Fig 4F
IL1b
	Abx						Abx-TCDCA
3 dpi	22.63	11.77	16.35	30.44	24.47	16.51	6.2	5.51	5.06	8.32	24.14
5 dpi	24.88	14	12.7	12.95	15.34	27.49	20.31	19.36	7.24	14.99	21.05	10.36
IL6
	Abx						Abx-TCDCA
3 dpi	72	67.56	81.63	85.13	92.48	71.51	50.49	35.39	37.55	52.58	56.21	35.39
5 dpi	71	89.72	70.3	35.14	36.27	57.11	3.6	3.2	48.31	54.57	33.37	39.46
Tnfa
	Abx						Abx-TCDCA
3 dpi	3.7	4.19	3.99	3.19	4.95	4.32	3.19	4.46	3.09	2.78	3.92	3.83
5 dpi	5.45	3.49	3.12	2.2	2.31	2.29	1.75	1.45	1.33	2.13	2.45	1.92
