# Supplementary material
Source: publisher figshare collection journal article supplement (https://springernature.figshare.com/articles/dataset/_/21334422)
Supplement: Supplementary file 5 [file 1 › Source_Data_Figure_5.xlsx]

## Sheet: Fig 5C
TCDCA Content(ng/ml)
Abx	A. muciniphila	L. reuteri
74.4592	135.729	14.1238
92.5387	120.699	12.8262
39.7856	94.7515	16.74
41.5318	118.767
	105.907
TCDCA Content(ng/ml)
GF	A. muciniphila
10.7292	191.115
9.52376	132.424
21.3358	131.054
14.5428	161.927
18.0814	204.264

## Sheet: Fig 5D
BAAT (Fold change)
DMSO	HAL	Xanthosine	Prolylleucine	Phytic acid	3-Methylcrotonylglycine
0.86	1.33	1.11	0.98	1.24	1.2
1.16	1.39	1	1.01	1.44	0.68
1.16	1.52	1.06	0.92	1.15	0.85
0.87	1.65	1.19	0.8	1.23	1.06

## Sheet: Fig 5F
siNC								siBAAT
TCDCA Content(ng/ml)				CDCA Content(ng/ml)				TCDCA Content(ng/ml)			CDCA Content(ng/ml)
HAL	CDCA	HAL+CDCA		HAL	CDCA	HAL+CDCA		CDCA	HAL+CDCA		CDCA	HAL+CDCA
50.9989	815.623	1215.26		251.16	7829.99	6480.83		738.246	981.824		11188.3	11233.8
288.99	898.09	1175.73		486.664	8456.19	6212.41		592.946	729.024		11089.3	11756.8
283.589	913.915	1242.9		480.506	8835.61	6777.49		597.33	726.247		10406.6	10386.2

## Sheet: Fig 5I
IL1b (Fold change)					IL6 (Fold change)					Tnfa (Fold change)					viral load
GF	HAL	SF	HAL+SF		GF	HAL	SF	HAL+SF		GF	HAL	SF	HAL+SF		SF	HAL+SF
0.69	0.97	13.01	10.85		1	1.17	22.01	17.75		1.15	0.73	1.6	1.18		3.91029	3.04876
1.38	1.81	13.36	1.87		1.08	0.94	28.25	16.04		1.08	0.84	2.26	1.61		3.57442	3.31403
1.05	1.85	13.23	10.95		0.92	0.97	31.47	0.65		0.8	0.79	1.89	0.67		3.59682	3.47376
		16.19	9.55				28.5	10.87				1.53	1.12		3.61132	3.02263
							18.66	12.9				1.39	1.26		3.79082
