# Supplementary material
Source: publisher figshare collection journal article supplement (https://springernature.figshare.com/articles/dataset/_/21334422)
Supplement: Supplementary file 5 [file 1 › Source_Data_Figure_6.xlsx]

## Sheet: Fig 6A
IL1B (Fold change)				IL6 (Fold change)				viral load
100μM GCDCA	SFTSV	100μM GCDCA+SFTSV		100μM GCDCA	SFTSV	100μM GCDCA+SFTSV		SFTSV	100μM GCDCA+SFTSV
2.29	244.77	67.06		3.18449	63.1357	15.6979		5.96	5.59
2.07	203.24	31.44		3.02169	36.9882	18.4802		5.27	5.9
1.31	169.5	22.53		2.87999	80.5263	20.573		5.76	5.68
1.99	184.68	27.32		0.99553	58.5609	7.97701		5.69	5.86
2.16	229.65	50.63		0.979067	40.7582	5.02814		5.64	5.63
1.97	203.71	36.02		1.01126	62.7934	5.30055		5.81	5.86

## Sheet: Fig 6B
IL-1β (Fold change)					IL-6 (Fold change)
MOCK	100μM GCDCA	SFTSV	100μM GCDCA+SFTSV		MOCK	100μM GCDCA	SFTSV	100μM GCDCA+SFTSV
23.7649	21.0175	2919.93	487.503		1.6356	9.6286	5293.25	565.144
25.0578	17.7798	2338.39	442.628		5.4605	7.0405	4621.21	467.84
22.7198	16.9071	1724.53	410.036		0.842	10.7977	6408.56	554.92
34.3613	32.8206	1587.43	346.091		1.5283	2.2504	9128.9	830.601
27.4174	40.1956	1437.4	343.075		3.187	2.4005	8910.85	806.221
25.548	34.0273	1811.8	317.055		5.9037	1.7142	8923.71	636.351

## Sheet: Fig 6G
IL1B (Fold change)								IL-1β (Fold change)
sictrl			siTGR5					MOCK	100μM GCDCA	SFTSV	100μM GCDCA+SFTSV
100μM GCDCA	SFTSV	100μM GCDCA+SFTSV	100μM GCDCA	SFTSV	100μM GCDCA+SFTSV			NA	NA	4275.11	4584.01
0.09	10.82	2.12	0.25	19.2	21.34			NA	NA	4458.09	4397.26
0.16	26.89	6.33	0.35	14.04	21.36			NA	NA	4785.85	3805.88
0.14	13.88	2.16	0.38	26.66	14.93			NA	NA	4292.09	2845.71
0.04	19.42	3.23	0.03	17.41	11.04			NA	NA	5552.19	4075.63
0.03	23.28	2.21	0.08	35.01	15.99			NA	NA	4175.61	3685.15
0.02	23.63	3.48	0.04	15.31	10.31
IL6 (Fold change)								IL-6 (Fold change)
sictrl			siTGR5					MOCK	100μM GCDCA	SFTSV	100μM GCDCA+SFTSV
100μM GCDCA	SFTSV	100μM GCDCA+SFTSV	100μM GCDCA	SFTSV	100μM GCDCA+SFTSV			NA	NA	9185.59	8836.58
0.03	105.53	13.61	0.11	39.19	81.51			NA	NA	7744.65	8916.18
0.03	181.12	59.53	0.1	21.58	56.46			NA	NA	8735.57	7769.14
0.16	140.12	30.51	0.34	101.07	69.08			NA	NA	8307.96	7652.8
0.93	179.99	55.2	0.27	16.2	19.67			NA	NA	6215.94	8844.59
2.34	220.11	67.37	0.25	32.36	15.61			NA	NA	8495.74	8259.19
0.67	214.91	54.47	0.26	15.65	12.24
