# Supplementary material
Source: publisher figshare collection journal article supplement (https://springernature.figshare.com/articles/dataset/_/21334422)

Figure S8H

1. BAAT

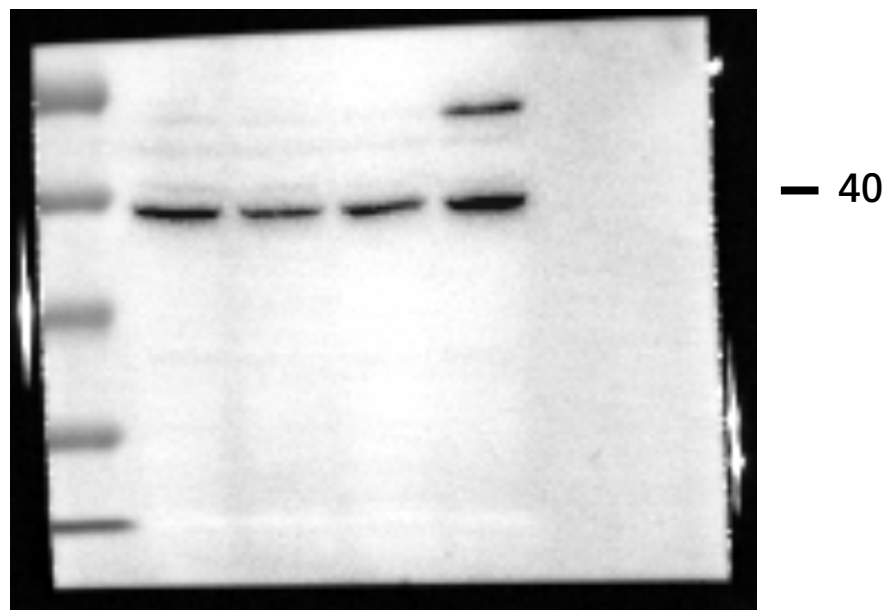

2. Actin

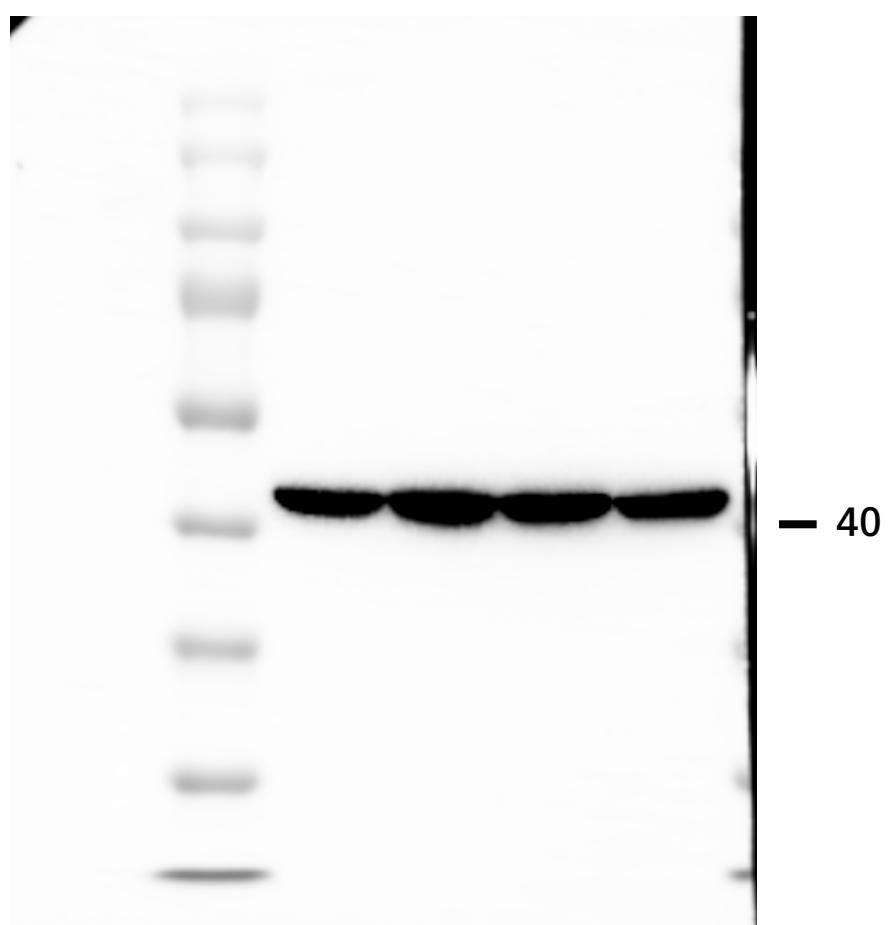

Supplement: Supplementary file 1 [file 1]
